# Supplementary material for: Molecular evolution of WDR62, a gene that regulates neocorticogenesis
Source: PubMed Central journal article supplement — Meta Gene. 2016 Mar 2;9:1–9. doi: 10.1016/j.mgene.2016.02.005 (PMC4833054; doi:10.1016/j.mgene.2016.02.005), 2016-03-02
Supplement: mmc1.pdf [file mmc1.pdf]

# **Supplementary Information**

## **Molecular Evolution of WDR62, a Gene that Regulates Neocortico-genesis**

**Nashaiman Pervaiz and Amir Ali Abbasi\***

National Center for Bioinformatics, Program of Comparative and Evolutionary Genomics,  
Faculty of Biological Sciences, Quaid-i-Azam University, Islamabad 45320, Pakistan.

\*Corresponding author

E-mail: [abbasiam@qau.edu.pk](mailto:abbasiam@qau.edu.pk)

Tel Office: [+92-51-90644109](tel:+92-51-90644109)

Supplementary Fig. 1

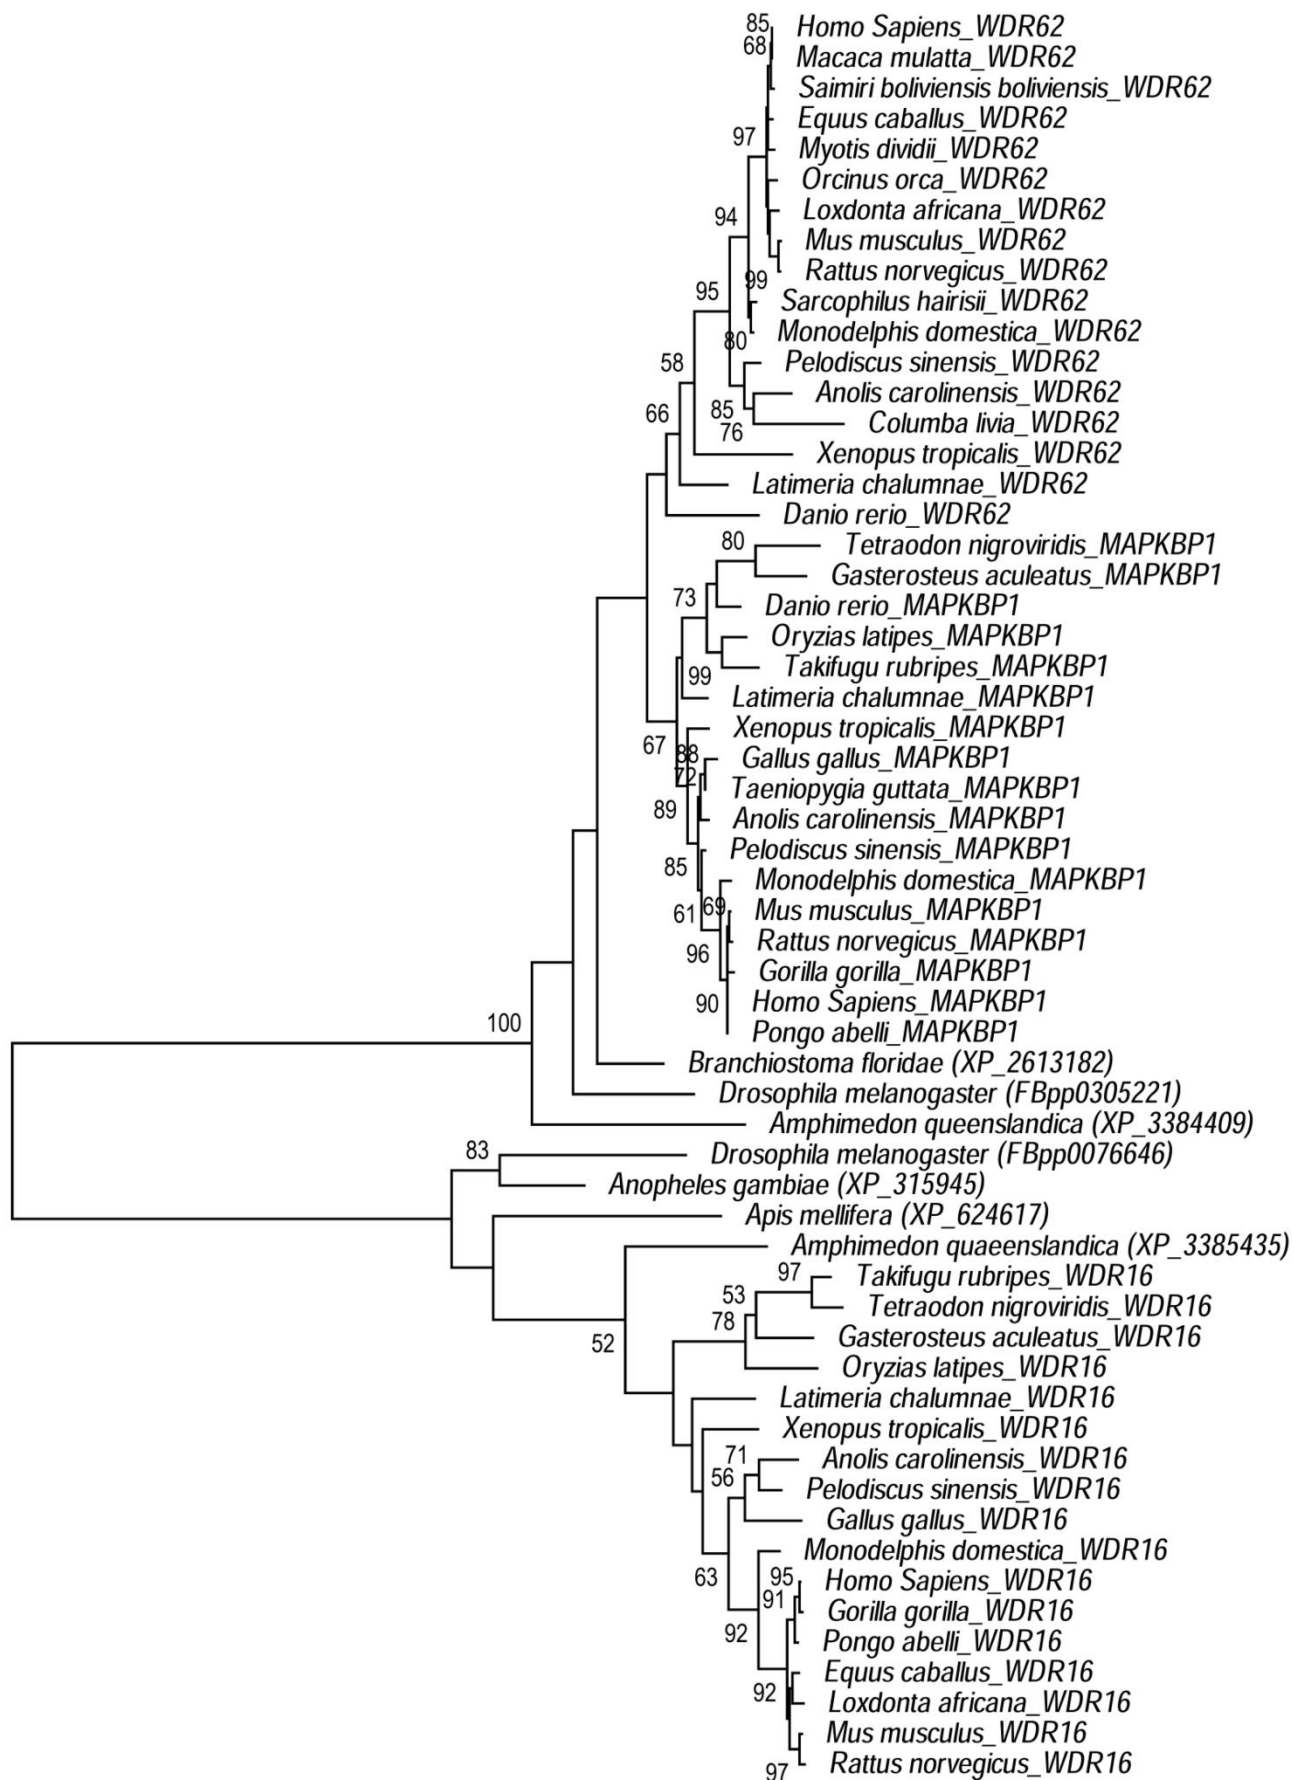

0.5

**Supplementary Fig. 1** Evolutionary history of WDR62 protein.

The evolutionary history was inferred by using the Maximum Likelihood method based on the Whelan And Goldman model. The tree is drawn to scale, with branch lengths measured in the number of substitutions per site. The analysis involved 58 amino acid sequences. All positions containing gaps and missing data were eliminated. There were a total of 386 positions in the final dataset

Supplementary Fig. 2

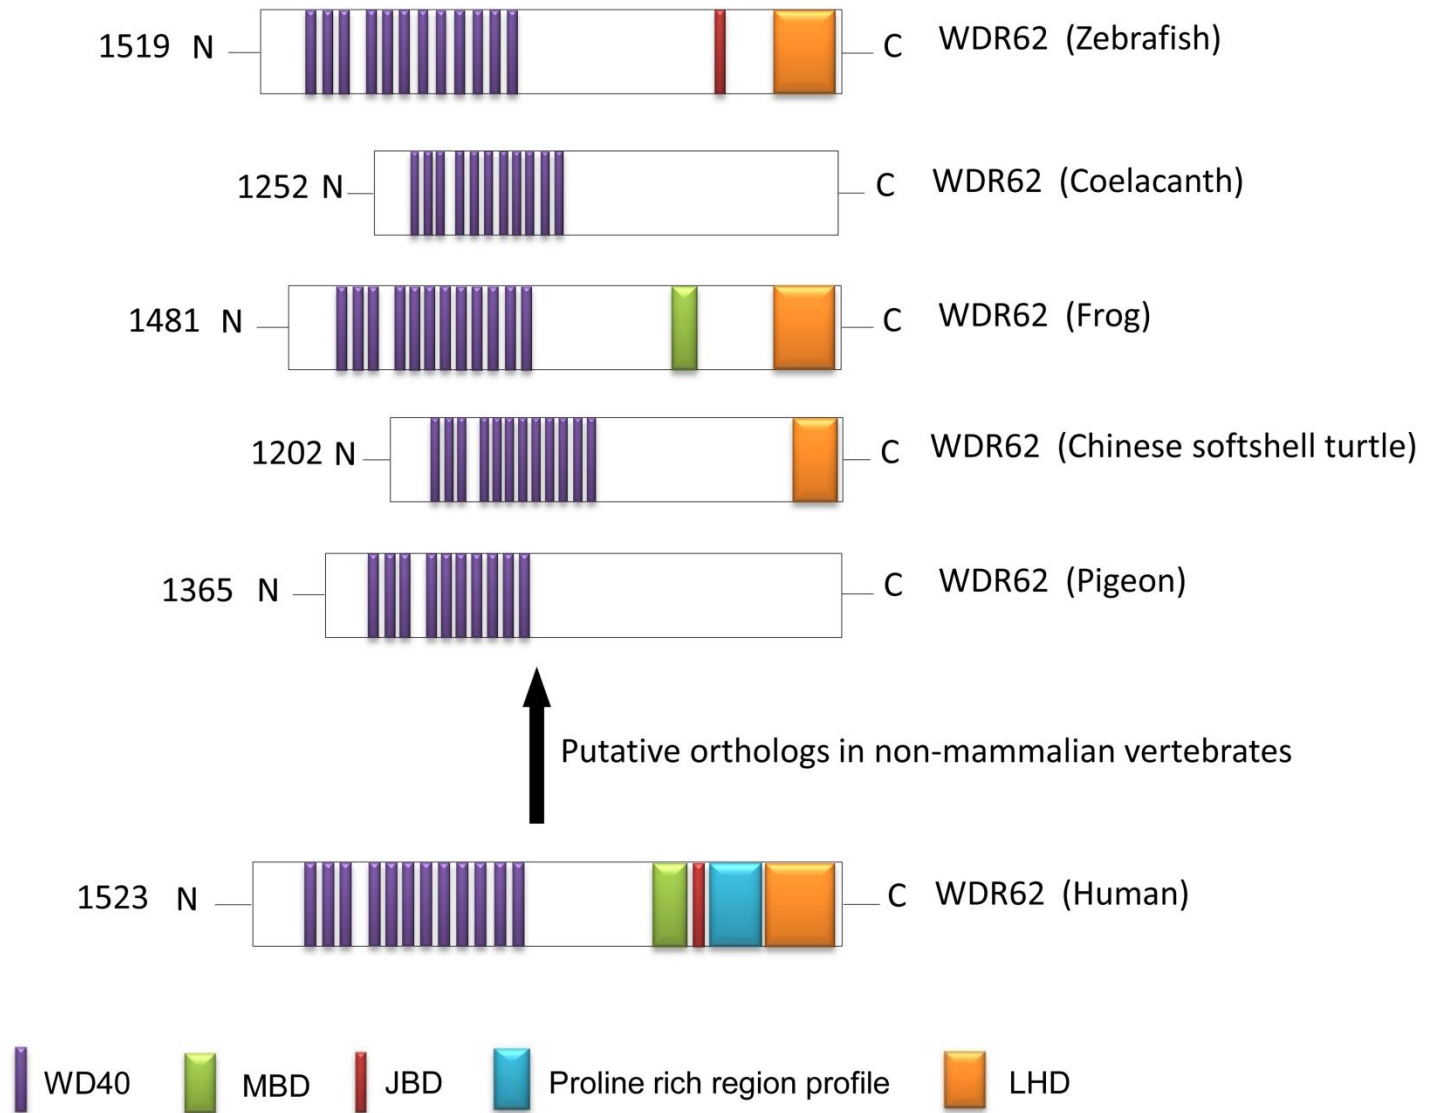

**Supplementary Fig. 2** Domain organization of WDR62 protein.

Schematic illustration of comparative organization of five key functional domains of human WDR62 across its orthologous protein in various non-mammalian vertebrates. MBD; MKK7 $\beta$ 1 binding domain, JBD; JNK binding domain, LHD; Loop helix domain

**Supplementary Table 1** DNA sequence variations in human WDR62

| SNP | dbSNP Number<br>(build 137) | Coding exon<br>(WDR62) | Position (GRCh37) | Nucleotide change | mRNA Position | Amino Acid<br>Position | Codon<br>Change |
|-----|-----------------------------|------------------------|-------------------|-------------------|---------------|------------------------|-----------------|
| 1   | rs61742664                  | 2                      | 36549684-36549684 | G to A (V)        | 215           | 60                     | GTG→GTA         |
| 2   | rs11538454                  | 2                      | 36549690-36549690 | C to T (L)        | 221           | 62                     | CTC→CTG         |
| 3   | rs12327568                  | 7                      | 36558896-36558896 | A (K) to G (R)    | 901           | 289                    | AAG→AGG         |
| 4   | rs75230537                  | 10                     | 36572416-36572416 | T (F) to C (L)    | 1350          | 439                    | TTC→CTC         |
| 5   | rs45567532                  | 11                     | 36574063-36574063 | C to T (D)        | 1505          | 490                    | GAC→GAT         |
| 6   | rs2301734                   | 12                     | 36575645-36575645 | G to A (T)        | 1676          | 547                    | ACG→ACA         |
| 7   | rs114968951                 | 16                     | 36581404-36581404 | C to T (D)        | 2051          | 672                    | GAC→GAT         |
| 8   | rs115453534                 | 17                     | 36582179-36582179 | G to C(S)         | 2147          | 704                    | TCG→TCC         |
| 9   | rs61494900                  | 19                     | 36583651-36583651 | G to A (L)        | 2306          | 757                    | CTG→CTA         |
| 10  | rs61744321                  | 19                     | 36583661-36583661 | C (H) to T (Y)    | 2316          | 761                    | CAC→TAC         |
| 11  | rs61747277                  | 19                     | 36583692-36583692 | A (K) to G (R)    | 2347          | 771                    | AAG→AGG         |
| 12  | rs2285745                   | 22                     | 36590329-36590329 | C (S) to T (L)    | 2584          | 850                    | TCG→TTG         |
| 13  | rs74518295                  | 25                     | 36592569-36592569 | C (S) to T (L)    | 3010          | 992                    | TCG→TTG         |
| 14  | rs77898819                  | 25                     | 36592585-36592585 | C to T (A)        | 3026          | 997                    | GCC→GCT         |
| 15  | rs11817551                  | 25                     | 36592627-36592627 | G to A (P)        | 3068          | 1011                   | CCG→CCA         |
| 16  | rs61741470                  | 28                     | 36593315-36593315 | T (M)to G (R)     | 3436          | 1134                   | ATG→AGG         |
| 17  | rs17851502                  | 29                     | 36594063-36594063 | C to T (L)        | 3503          | 1156                   | CTC→CTT         |
| 18  | rs45470992                  | 30                     | 36594369-36594369 | C to T (S)        | 3674          | 1213                   | TCC→TCT         |
| 19  | rs61743589                  | 30                     | 36594404-36594404 | G (R) to A (H)    | 3709          | 1225                   | CGT→CAT         |
| 20  | rs2074435                   | 30                     | 36594659-36594659 | T (L) to A (Q)    | 3964          | 1310                   | CTG→CAG         |
| 21  | rs17851503                  | 30                     | 36594853-36594853 | G (G) to A (S)    | 4158          | 1375                   | GGC→AGC         |
| 22  | rs1008328                   | 30                     | 36595436-36595436 | C (F) to A (L)    | 4205          | 1390                   | TTC→TTA         |

Variants were filtered by 1000 Genome, HapMap, clustering and frequency to remove the invalidated polymorphisms. Variants filtering identify twenty two validated intraspecific human polymorphisms that are used in neutrality tests. Amino acid replacements are given in parentheses in fifth column

**Supplementary Table 2** Status of rs2285745 in fourteen population of 1000 Genome Project

**CHINESE**

**Han Chinese in Beijing, China. (CHB)**

|         |         |         |         |         |         |
|---------|---------|---------|---------|---------|---------|
| NA18525 | NA18526 | NA18527 | NA18528 | NA18530 | NA18532 |
| NA18534 | NA18535 | NA18536 | NA18537 | NA18538 | NA18539 |
| NA18541 | NA18542 | NA18543 | NA18544 | NA18545 | NA18546 |
| NA18547 | NA18548 | NA18549 | NA18550 | NA18552 | NA18553 |
| NA18555 | NA18557 | NA18558 | NA18559 | NA18560 | NA18561 |
| NA18562 | NA18563 | NA18564 | NA18565 | NA18566 | NA18567 |
| NA18570 | NA18571 | NA18572 | NA18573 | NA18574 | NA18576 |
| NA18577 | NA18579 | NA18582 | NA18592 | NA18593 | NA18595 |
| NA18596 | NA18597 | NA18599 | NA18602 | NA18603 | NA18605 |
| NA18606 | NA18608 | NA18609 | NA18610 | NA18611 | NA18612 |
| NA18613 | NA18614 | NA18615 | NA18616 | NA18617 | NA18618 |
| NA18619 | NA18620 | NA18621 | NA18622 | NA18623 | NA18624 |
| NA18626 | NA18627 | NA18628 | NA18630 | NA18631 | NA18632 |
| NA18633 | NA18634 | NA18635 | NA18636 | NA18637 | NA18638 |
| NA18639 | NA18640 | NA18641 | NA18642 | NA18643 | NA18645 |
| NA18647 | NA18740 | NA18745 | NA18747 | NA18748 | NA18749 |
| NA18757 |         |         |         |         |         |

**Han Chinese South. (CHS)**

|         |         |         |         |         |         |
|---------|---------|---------|---------|---------|---------|
| HG00403 | HG00404 | HG00406 | HG00407 | HG00418 | HG00419 |
| HG00421 | HG00422 | HG00427 | HG00428 | HG00436 | HG00437 |
| HG00442 | HG00443 | HG00445 | HG00446 | HG00448 | HG00449 |
| HG00451 | HG00452 | HG00457 | HG00458 | HG00463 | HG00464 |
| HG00472 | HG00473 | HG00475 | HG00476 | HG00478 | HG00479 |
| HG00500 | HG00501 | HG00512 | HG00513 | HG00524 | HG00525 |
| HG00530 | HG00531 | HG00533 | HG00534 | HG00536 | HG00537 |
| HG00542 | HG00543 | HG00556 | HG00557 | HG00559 | HG00560 |
| HG00565 | HG00566 | HG00577 | HG00578 | HG00580 | HG00581 |
| HG00583 | HG00584 | HG00589 | HG00590 | HG00592 | HG00593 |
| HG00595 | HG00596 | HG00607 | HG00608 | HG00610 | HG00611 |
| HG00613 | HG00614 | HG00619 | HG00620 | HG00625 | HG00626 |
| HG00628 | HG00629 | HG00634 | HG00635 | HG00650 | HG00651 |
| HG00653 | HG00654 | HG00656 | HG00657 | HG00662 | HG00663 |
| HG00671 | HG00672 | HG00683 | HG00684 | HG00689 | HG00690 |
| HG00692 | HG00693 | HG00698 | HG00699 | HG00701 | HG00702 |
| HG00704 | HG00705 | HG00707 | HG00708 |         |         |

**JAPANESE**

**Japanese population in Tokyo, Japan. (JPT)**

|         |         |         |         |         |         |
|---------|---------|---------|---------|---------|---------|
| NA18939 | NA18940 | NA18941 | NA18942 | NA18943 | NA18944 |
| NA18945 | NA18946 | NA18947 | NA18948 | NA18949 | NA18950 |
| NA18951 | NA18952 | NA18953 | NA18954 | NA18956 | NA18957 |
| NA18959 | NA18960 | NA18961 | NA18962 | NA18963 | NA18964 |
| NA18965 | NA18966 | NA18968 | NA18971 | NA18973 | NA18974 |
| NA18975 | NA18976 | NA18977 | NA18978 | NA18980 | NA18981 |
| NA18982 | NA18983 | NA18984 | NA18985 | NA18986 | NA18987 |
| NA18988 | NA18989 | NA18990 | NA18992 | NA18994 | NA18995 |
| NA18998 | NA18999 | NA19000 | NA19002 | NA19003 | NA19004 |
| NA19005 | NA19007 | NA19009 | NA19010 | NA19012 | NA19054 |
| NA19055 | NA19056 | NA19057 | NA19058 | NA19059 | NA19060 |

|         |         |         |         |         |         |
|---------|---------|---------|---------|---------|---------|
| NA19062 | NA19063 | NA19064 | NA19065 | NA19066 | NA19067 |
| NA19068 | NA19070 | NA19072 | NA19074 | NA19075 | NA19076 |
| NA19077 | NA19078 | NA19079 | NA19080 | NA19081 | NA19082 |
| NA19083 | NA19084 | NA19085 | NA19087 | NA19088 |         |

---

**NORTH EUROPEAN**

**Finnish in Finland. (FIN)**

|         |         |         |         |         |         |
|---------|---------|---------|---------|---------|---------|
| HG00171 | HG00173 | HG00174 | HG00176 | HG00177 | HG00178 |
| HG00179 | HG00180 | HG00182 | HG00183 | HG00185 | HG00186 |
| HG00187 | HG00188 | HG00189 | HG00190 | HG00266 | HG00267 |
| HG00268 | HG00269 | HG00270 | HG00271 | HG00272 | HG00273 |
| HG00274 | HG00275 | HG00276 | HG00277 | HG00278 | HG00280 |
| HG00281 | HG00282 | HG00284 | HG00285 | HG00306 | HG00309 |
| HG00310 | HG00311 | HG00312 | HG00313 | HG00315 | HG00318 |
| HG00319 | HG00320 | HG00321 | HG00323 | HG00324 | HG00325 |
| HG00326 | HG00327 | HG00328 | HG00329 | HG00330 | HG00331 |
| HG00332 | HG00334 | HG00335 | HG00336 | HG00337 | HG00338 |
| HG00339 | HG00341 | HG00342 | HG00343 | HG00344 | HG00345 |
| HG00346 | HG00349 | HG00350 | HG00351 | HG00353 | HG00355 |
| HG00356 | HG00357 | HG00358 | HG00359 | HG00360 | HG00361 |
| HG00362 | HG00364 | HG00366 | HG00367 | HG00369 | HG00372 |
| HG00373 | HG00375 | HG00376 | HG00377 | HG00378 | HG00381 |
| HG00382 | HG00383 | HG00384 |         |         |         |

**British in England and Scotland. (GBR)**

|         |         |         |         |         |         |
|---------|---------|---------|---------|---------|---------|
| HG00096 | HG00097 | HG00099 | HG00100 | HG00101 | HG00102 |
| HG00103 | HG00104 | HG00106 | HG00108 | HG00109 | HG00110 |
| HG00111 | HG00112 | HG00113 | HG00114 | HG00116 | HG00117 |
| HG00118 | HG00119 | HG00120 | HG00121 | HG00122 | HG00123 |
| HG00124 | HG00125 | HG00126 | HG00127 | HG00128 | HG00129 |
| HG00130 | HG00131 | HG00133 | HG00134 | HG00135 | HG00136 |
| HG00137 | HG00138 | HG00139 | HG00140 | HG00141 | HG00142 |
| HG00143 | HG00146 | HG00148 | HG00149 | HG00150 | HG00151 |
| HG00152 | HG00154 | HG00155 | HG00156 | HG00158 | HG00159 |
| HG00160 | HG00231 | HG00232 | HG00233 | HG00234 | HG00235 |
| HG00236 | HG00237 | HG00238 | HG00239 | HG00240 | HG00242 |
| HG00243 | HG00244 | HG00245 | HG00246 | HG00247 | HG00249 |
| HG00250 | HG00251 | HG00252 | HG00253 | HG00254 | HG00255 |
| HG00256 | HG00257 | HG00258 | HG00259 | HG00260 | HG00261 |
| HG00262 | HG00263 | HG00264 | HG00265 | HG01334 |         |

---

**ITALIAN**

**Toscani in Italia. (TSI)**

|         |         |         |         |         |         |
|---------|---------|---------|---------|---------|---------|
| NA20502 | NA20503 | NA20504 | NA20505 | NA20506 | NA20507 |
| NA20508 | NA20509 | NA20510 | NA20512 | NA20513 | NA20515 |
| NA20516 | NA20517 | NA20518 | NA20519 | NA20520 | NA20521 |
| NA20522 | NA20524 | NA20525 | NA20527 | NA20528 | NA20529 |
| NA20530 | NA20531 | NA20532 | NA20533 | NA20534 | NA20535 |
| NA20536 | NA20537 | NA20538 | NA20539 | NA20540 | NA20541 |
| NA20542 | NA20543 | NA20544 | NA20581 | NA20582 | NA20585 |
| NA20586 | NA20588 | NA20589 | NA20752 | NA20753 | NA20754 |
| NA20755 | NA20756 | NA20757 | NA20758 | NA20759 | NA20760 |
| NA20761 | NA20765 | NA20766 | NA20768 | NA20769 | NA20770 |
| NA20771 | NA20772 | NA20773 | NA20774 | NA20775 | NA20778 |

---



|         |         |         |         |         |         |
|---------|---------|---------|---------|---------|---------|
| NA20783 | NA20785 | NA20786 | NA20787 | NA20790 | NA20792 |
| NA20795 | NA20796 | NA20797 | NA20798 | NA20799 | NA20800 |
| NA20801 | NA20802 | NA20803 | NA20804 | NA20805 | NA20806 |
| NA20807 | NA20808 | NA20809 | NA20810 | NA20811 | NA20812 |
| NA20813 | NA20814 | NA20815 | NA20816 | NA20818 | NA20819 |
| NA20826 | NA20828 |         |         |         |         |

---

**SPANISH**

**Iberian populations in Spain. (IBS)**

|         |         |         |         |         |         |
|---------|---------|---------|---------|---------|---------|
| HG01515 | HG01516 | HG01518 | HG01519 | HG01521 | HG01522 |
| HG01617 | HG01618 | HG01619 | HG01620 | HG01623 | HG01624 |
| HG01625 | HG01626 |         |         |         |         |

---

**NORTH AMERICAN**

**Utah residents (CEPH) with Northern and Western European ancestry. (CEU)**

|         |         |         |         |         |         |
|---------|---------|---------|---------|---------|---------|
| NA06984 | NA06986 | NA06989 | NA06994 | NA07000 | NA07037 |
| NA07048 | NA07051 | NA07056 | NA07347 | NA07357 | NA10847 |
| NA10851 | NA11829 | NA11830 | NA11831 | NA11843 | NA11892 |
| NA11893 | NA11894 | NA11919 | NA11920 | NA11930 | NA11931 |
| NA11932 | NA11933 | NA11992 | NA11993 | NA11994 | NA11995 |
| NA12003 | NA12004 | NA12006 | NA12043 | NA12044 | NA12045 |
| NA12046 | NA12058 | NA12144 | NA12154 | NA12155 | NA12249 |
| NA12272 | NA12273 | NA12275 | NA12282 | NA12283 | NA12286 |
| NA12287 | NA12340 | NA12341 | NA12342 | NA12347 | NA12348 |
| NA12383 | NA12399 | NA12400 | NA12413 | NA12489 | NA12546 |
| NA12716 | NA12717 | NA12718 | NA12748 | NA12749 | NA12750 |
| NA12751 | NA12761 | NA12763 | NA12775 | NA12777 | NA12778 |
| NA12812 | NA12814 | NA12815 | NA12827 | NA12829 | NA12830 |
| NA12842 | NA12843 | NA12872 | NA12873 | NA12874 | NA12889 |
| NA12890 |         |         |         |         |         |

**Mexican Ancestry in Los Angeles, California. (MXL)**

|         |         |         |         |         |         |
|---------|---------|---------|---------|---------|---------|
| NA19648 | NA19651 | NA19652 | NA19654 | NA19655 | NA19657 |
| NA19660 | NA19661 | NA19663 | NA19664 | NA19672 | NA19675 |
| NA19676 | NA19678 | NA19679 | NA19681 | NA19682 | NA19684 |
| NA19685 | NA19716 | NA19717 | NA19719 | NA19720 | NA19722 |
| NA19723 | NA19725 | NA19726 | NA19728 | NA19729 | NA19731 |
| NA19732 | NA19734 | NA19735 | NA19737 | NA19738 | NA19740 |
| NA19741 | NA19746 | NA19747 | NA19749 | NA19750 | NA19752 |
| NA19753 | NA19755 | NA19756 | NA19758 | NA19759 | NA19761 |
| NA19762 | NA19764 | NA19770 | NA19771 | NA19773 | NA19774 |
| NA19776 | NA19777 | NA19779 | NA19780 | NA19782 | NA19783 |
| NA19785 | NA19786 | NA19788 | NA19789 | NA19794 | NA19795 |

**Puerto Rican in Puerto Rico. (PUR)**

|         |         |         |         |         |         |
|---------|---------|---------|---------|---------|---------|
| HG00553 | HG00554 | HG00637 | HG00638 | HG00640 | HG00641 |
| HG00731 | HG00732 | HG00734 | HG00736 | HG00737 | HG00740 |
| HG01047 | HG01048 | HG01051 | HG01052 | HG01055 | HG01060 |
| HG01061 | HG01066 | HG01067 | HG01069 | HG01070 | HG01072 |
| HG01073 | HG01075 | HG01079 | HG01080 | HG01082 | HG01083 |
| HG01085 | HG01095 | HG01097 | HG01098 | HG01101 | HG01102 |
| HG01104 | HG01105 | HG01107 | HG01108 | HG01167 | HG01168 |
| HG01170 | HG01171 | HG01173 | HG01174 | HG01176 | HG01183 |
| HG01187 | HG01188 | HG01190 | HG01191 | HG01197 | HG01198 |

---

HG01204

---

**SOUTH AMERICAN**

**Colombian in Medellin, Colombia. (CLM)**

|         |         |         |         |         |         |
|---------|---------|---------|---------|---------|---------|
| HG01112 | HG01113 | HG01124 | HG01125 | HG01133 | HG01134 |
| HG01136 | HG01137 | HG01140 | HG01148 | HG01149 | HG01250 |
| HG01251 | HG01257 | HG01259 | HG01271 | HG01272 | HG01274 |
| HG01275 | HG01277 | HG01278 | HG01342 | HG01344 | HG01345 |
| HG01350 | HG01351 | HG01353 | HG01354 | HG01356 | HG01357 |
| HG01359 | HG01360 | HG01365 | HG01366 | HG01374 | HG01375 |
| HG01377 | HG01378 | HG01383 | HG01384 | HG01389 | HG01390 |
| HG01437 | HG01440 | HG01441 | HG01455 | HG01456 | HG01461 |
| HG01462 | HG01465 | HG01488 | HG01489 | HG01491 | HG01492 |
| HG01494 | HG01495 | HG01497 | HG01498 | HG01550 | HG01551 |

---

**AFRICAN-AMERICAN**

**African Ancestry in Southwest US. (ASW)**

|         |         |         |         |         |         |
|---------|---------|---------|---------|---------|---------|
| NA19625 | NA19700 | NA19701 | NA19703 | NA19704 | NA19707 |
| NA19711 | NA19712 | NA19713 | NA19818 | NA19819 | NA19834 |
| NA19835 | NA19900 | NA19901 | NA19904 | NA19908 | NA19909 |
| NA19914 | NA19916 | NA19917 | NA19920 | NA19921 | NA19922 |
| NA19923 | NA19982 | NA19984 | NA19985 | NA20126 | NA20127 |
| NA20276 | NA20278 | NA20281 | NA20282 | NA20287 | NA20289 |
| NA20291 | NA20294 | NA20296 | NA20298 | NA20299 | NA20314 |
| NA20317 | NA20322 | NA20332 | NA20334 | NA20336 | NA20339 |
| NA20340 | NA20341 | NA20342 | NA20344 | NA20346 | NA20348 |
| NA20351 | NA20356 | NA20357 | NA20359 | NA20363 | NA20412 |
| NA20414 |         |         |         |         |         |

---

**AFRICAN**

**Luhya in Webuyo, Kenya. (LWK)**

|         |         |         |         |         |         |
|---------|---------|---------|---------|---------|---------|
| NA19020 | NA19028 | NA19035 | NA19036 | NA19038 | NA19041 |
| NA19044 | NA19046 | NA19307 | NA19308 | NA19309 | NA19310 |
| NA19311 | NA19312 | NA19313 | NA19315 | NA19316 | NA19317 |
| NA19318 | NA19319 | NA19321 | NA19324 | NA19327 | NA19328 |
| NA19331 | NA19332 | NA19334 | NA19338 | NA19346 | NA19347 |
| NA19350 | NA19351 | NA19352 | NA19355 | NA19359 | NA19360 |
| NA19371 | NA19372 | NA19373 | NA19374 | NA19375 | NA19376 |
| NA19377 | NA19379 | NA19380 | NA19381 | NA19382 | NA19383 |
| NA19384 | NA19385 | NA19390 | NA19391 | NA19393 | NA19394 |
| NA19395 | NA19396 | NA19397 | NA19398 | NA19399 | NA19401 |
| NA19403 | NA19404 | NA19428 | NA19429 | NA19430 | NA19431 |
| NA19434 | NA19435 | NA19436 | NA19437 | NA19438 | NA19439 |
| NA19440 | NA19443 | NA19444 | NA19445 | NA19446 | NA19448 |
| NA19449 | NA19451 | NA19452 | NA19453 | NA19455 | NA19456 |
| NA19457 | NA19461 | NA19462 | NA19463 | NA19466 | NA19467 |
| NA19468 | NA19469 | NA19470 | NA19471 | NA19472 | NA19473 |
| NA19474 |         |         |         |         |         |

**Yoruba in Ibadan, Nigeria. (YRI)**

|         |         |         |         |         |         |
|---------|---------|---------|---------|---------|---------|
| NA18486 | NA18487 | NA18489 | NA18498 | NA18499 | NA18501 |
| NA18502 | NA18504 | NA18505 | NA18507 | NA18508 | NA18510 |
| NA18511 | NA18516 | NA18517 | NA18519 | NA18520 | NA18522 |
| NA18523 | NA18853 | NA18856 | NA18858 | NA18861 | NA18867 |

---

|         |         |         |         |         |         |
|---------|---------|---------|---------|---------|---------|
| NA18868 | NA18870 | NA18871 | NA18873 | NA18874 | NA18907 |
| NA18908 | NA18909 | NA18910 | NA18912 | NA18916 | NA18917 |
| NA18923 | NA18924 | NA18933 | NA18934 | NA19093 | NA19095 |
| NA19096 | NA19098 | NA19099 | NA19102 | NA19107 | NA19108 |
| NA19113 | NA19114 | NA19116 | NA19117 | NA19118 | NA19119 |
| NA19121 | NA19129 | NA19130 | NA19131 | NA19137 | NA19138 |
| NA19146 | NA19147 | NA19149 | NA19150 | NA19152 | NA19160 |
| NA19171 | NA19172 | NA19175 | NA19185 | NA19189 | NA19190 |
| NA19197 | NA19198 | NA19200 | NA19204 | NA19207 | NA19209 |
| NA19213 | NA19222 | NA19223 | NA19225 | NA19235 | NA19236 |
| NA19247 | NA19248 | NA19256 | NA19257 |         |         |

---

## STATISTICS

Mutation ID: rs2285745

Ancestral Allele: C

Ancestral Amino Acid: S

Mutations Type: (C/T)

Amino acid change: S → L

Overall, 509 individuals have mutation at (36590329). Highlighted (yellow) individuals have derived allele (homozygous (0|0) genotype).

### Total individuals of corresponding populations

**CHB + CHS + JPT + FIN + GBR + TSI + IBS + CEU + CLM + MXL + PUR + ASW + LWK + YRI**  
 97 + 100 + 89 + 93 + 89 + 98 + 14 + 85 + 60 + 66 + 55 + 61 + 97 + 88 = 1092

**CHB + CHS + JPT + FIN + GBR + TSI + IBS + CEU + CLM + MXL + PUR + ASW + LWK + YRI**  
 39 + 44 + 29 + 41 + 39 + 42 + 4 + 43 + 30 + 33 + 25 + 25 + 66 + 49 = 509 1/1

**CHB + CHS + JPT + FIN + GBR + TSI + IBS + CEU + CLM + MXL + PUR + ASW + LWK + YRI**  
 17 + 17 + 7 + 6 + 5 + 13 + 1 + 8 + 10 + 8 + 5 + 2 + 5 + 4 = 108 0/0

**CHB + CHS + JPT + FIN + GBR + TSI + IBS + CEU + CLM + MXL + PUR + ASW + LWK + YRI**  
 41 + 39 + 53 + 46 + 45 + 43 + 9 + 34 + 20 + 25 + 25 + 34 + 26 + 35 = 475 1/0, 0/1

**Supplementary Table 3** Status of rs2074435 in fourteen population of 1000 Genome Project

---

**CHINESE**

**Han Chinese in Beijing, China. (CHB)**

|         |         |         |         |         |         |
|---------|---------|---------|---------|---------|---------|
| NA18525 | NA18526 | NA18527 | NA18528 | NA18530 | NA18532 |
| NA18534 | NA18535 | NA18536 | NA18537 | NA18538 | NA18539 |
| NA18541 | NA18542 | NA18543 | NA18544 | NA18545 | NA18546 |
| NA18547 | NA18548 | NA18549 | NA18550 | NA18552 | NA18553 |
| NA18555 | NA18557 | NA18558 | NA18559 | NA18560 | NA18561 |
| NA18562 | NA18563 | NA18564 | NA18565 | NA18566 | NA18567 |
| NA18570 | NA18571 | NA18572 | NA18573 | NA18574 | NA18576 |
| NA18577 | NA18579 | NA18582 | NA18592 | NA18593 | NA18595 |
| NA18596 | NA18597 | NA18599 | NA18602 | NA18603 | NA18605 |
| NA18606 | NA18608 | NA18609 | NA18610 | NA18611 | NA18612 |
| NA18613 | NA18614 | NA18615 | NA18616 | NA18617 | NA18618 |
| NA18619 | NA18620 | NA18621 | NA18622 | NA18623 | NA18624 |
| NA18626 | NA18627 | NA18628 | NA18630 | NA18631 | NA18632 |
| NA18633 | NA18634 | NA18635 | NA18636 | NA18637 | NA18638 |
| NA18639 | NA18640 | NA18641 | NA18642 | NA18643 | NA18645 |
| NA18647 | NA18740 | NA18745 | NA18747 | NA18748 | NA18749 |
| NA18757 |         |         |         |         |         |

**Han Chinese South. (CHS)**

|         |         |         |         |         |         |
|---------|---------|---------|---------|---------|---------|
| HG00403 | HG00404 | HG00406 | HG00407 | HG00418 | HG00419 |
| HG00421 | HG00422 | HG00427 | HG00428 | HG00436 | HG00437 |
| HG00442 | HG00443 | HG00445 | HG00446 | HG00448 | HG00449 |
| HG00451 | HG00452 | HG00457 | HG00458 | HG00463 | HG00464 |
| HG00472 | HG00473 | HG00475 | HG00476 | HG00478 | HG00479 |
| HG00500 | HG00501 | HG00512 | HG00513 | HG00524 | HG00525 |
| HG00530 | HG00531 | HG00533 | HG00534 | HG00536 | HG00537 |
| HG00542 | HG00543 | HG00556 | HG00557 | HG00559 | HG00560 |
| HG00565 | HG00566 | HG00577 | HG00578 | HG00580 | HG00581 |
| HG00583 | HG00584 | HG00589 | HG00590 | HG00592 | HG00593 |
| HG00595 | HG00596 | HG00607 | HG00608 | HG00610 | HG00611 |
| HG00613 | HG00614 | HG00619 | HG00620 | HG00625 | HG00626 |
| HG00628 | HG00629 | HG00634 | HG00635 | HG00650 | HG00651 |
| HG00653 | HG00654 | HG00656 | HG00657 | HG00662 | HG00663 |
| HG00671 | HG00672 | HG00683 | HG00684 | HG00689 | HG00690 |
| HG00692 | HG00693 | HG00698 | HG00699 | HG00701 | HG00702 |
| HG00704 | HG00705 | HG00707 | HG00708 |         |         |

---

**JAPANESE**

**Japanese population in Tokyo, Japan. (JPT)**

|         |         |         |         |         |         |
|---------|---------|---------|---------|---------|---------|
| NA18939 | NA18940 | NA18941 | NA18942 | NA18943 | NA18944 |
| NA18945 | NA18946 | NA18947 | NA18948 | NA18949 | NA18950 |
| NA18951 | NA18952 | NA18953 | NA18954 | NA18956 | NA18957 |
| NA18959 | NA18960 | NA18961 | NA18962 | NA18963 | NA18964 |
| NA18965 | NA18966 | NA18968 | NA18971 | NA18973 | NA18974 |
| NA18975 | NA18976 | NA18977 | NA18978 | NA18980 | NA18981 |
| NA18982 | NA18983 | NA18984 | NA18985 | NA18986 | NA18987 |
| NA18988 | NA18989 | NA18990 | NA18992 | NA18994 | NA18995 |
| NA18998 | NA18999 | NA19000 | NA19002 | NA19003 | NA19004 |
| NA19005 | NA19007 | NA19009 | NA19010 | NA19012 | NA19054 |
| NA19055 | NA19056 | NA19057 | NA19058 | NA19059 | NA19060 |

---

|         |         |         |         |         |         |
|---------|---------|---------|---------|---------|---------|
| NA19062 | NA19063 | NA19064 | NA19065 | NA19066 | NA19067 |
| NA19068 | NA19070 | NA19072 | NA19074 | NA19075 | NA19076 |
| NA19077 | NA19078 | NA19079 | NA19080 | NA19081 | NA19082 |
| NA19083 | NA19084 | NA19085 | NA19087 | NA19088 |         |

---

## NORTH EUROPEAN

### Finnish in Finland. (FIN)

|         |         |         |         |         |         |
|---------|---------|---------|---------|---------|---------|
| HG00171 | HG00173 | HG00174 | HG00176 | HG00177 | HG00178 |
| HG00179 | HG00180 | HG00182 | HG00183 | HG00185 | HG00186 |
| HG00187 | HG00188 | HG00189 | HG00190 | HG00266 | HG00267 |
| HG00268 | HG00269 | HG00270 | HG00271 | HG00272 | HG00273 |
| HG00274 | HG00275 | HG00276 | HG00277 | HG00278 | HG00280 |
| HG00281 | HG00282 | HG00284 | HG00285 | HG00306 | HG00309 |
| HG00310 | HG00311 | HG00312 | HG00313 | HG00315 | HG00318 |
| HG00319 | HG00320 | HG00321 | HG00323 | HG00324 | HG00325 |
| HG00326 | HG00327 | HG00328 | HG00329 | HG00330 | HG00331 |
| HG00332 | HG00334 | HG00335 | HG00336 | HG00337 | HG00338 |
| HG00339 | HG00341 | HG00342 | HG00343 | HG00344 | HG00345 |
| HG00346 | HG00349 | HG00350 | HG00351 | HG00353 | HG00355 |
| HG00356 | HG00357 | HG00358 | HG00359 | HG00360 | HG00361 |
| HG00362 | HG00364 | HG00366 | HG00367 | HG00369 | HG00372 |
| HG00373 | HG00375 | HG00376 | HG00377 | HG00378 | HG00381 |
| HG00382 | HG00383 | HG00384 |         |         |         |

### British in England and Scotland. (GBR)

|         |         |         |         |         |         |
|---------|---------|---------|---------|---------|---------|
| HG00096 | HG00097 | HG00099 | HG00100 | HG00101 | HG00102 |
| HG00103 | HG00104 | HG00106 | HG00108 | HG00109 | HG00110 |
| HG00111 | HG00112 | HG00113 | HG00114 | HG00116 | HG00117 |
| HG00118 | HG00119 | HG00120 | HG00121 | HG00122 | HG00123 |
| HG00124 | HG00125 | HG00126 | HG00127 | HG00128 | HG00129 |
| HG00130 | HG00131 | HG00133 | HG00134 | HG00135 | HG00136 |
| HG00137 | HG00138 | HG00139 | HG00140 | HG00141 | HG00142 |
| HG00143 | HG00146 | HG00148 | HG00149 | HG00150 | HG00151 |
| HG00152 | HG00154 | HG00155 | HG00156 | HG00158 | HG00159 |
| HG00160 | HG00231 | HG00232 | HG00233 | HG00234 | HG00235 |
| HG00236 | HG00237 | HG00238 | HG00239 | HG00240 | HG00242 |
| HG00243 | HG00244 | HG00245 | HG00246 | HG00247 | HG00249 |
| HG00250 | HG00251 | HG00252 | HG00253 | HG00254 | HG00255 |
| HG00256 | HG00257 | HG00258 | HG00259 | HG00260 | HG00261 |
| HG00262 | HG00263 | HG00264 | HG00265 | HG01334 |         |

---

## ITALIAN

### Toscani in Italia. (TSI)

|         |         |         |         |         |         |
|---------|---------|---------|---------|---------|---------|
| NA20502 | NA20503 | NA20504 | NA20505 | NA20506 | NA20507 |
| NA20508 | NA20509 | NA20510 | NA20512 | NA20513 | NA20515 |
| NA20516 | NA20517 | NA20518 | NA20519 | NA20520 | NA20521 |
| NA20522 | NA20524 | NA20525 | NA20527 | NA20528 | NA20529 |
| NA20530 | NA20531 | NA20532 | NA20533 | NA20534 | NA20535 |
| NA20536 | NA20537 | NA20538 | NA20539 | NA20540 | NA20541 |
| NA20542 | NA20543 | NA20544 | NA20581 | NA20582 | NA20585 |
| NA20586 | NA20588 | NA20589 | NA20752 | NA20753 | NA20754 |
| NA20755 | NA20756 | NA20757 | NA20758 | NA20759 | NA20760 |
| NA20761 | NA20765 | NA20766 | NA20768 | NA20769 | NA20770 |
| NA20771 | NA20772 | NA20773 | NA20774 | NA20775 | NA20778 |

---

|         |         |         |         |         |         |
|---------|---------|---------|---------|---------|---------|
| NA20783 | NA20785 | NA20786 | NA20787 | NA20790 | NA20792 |
| NA20795 | NA20796 | NA20797 | NA20798 | NA20799 | NA20800 |
| NA20801 | NA20802 | NA20803 | NA20804 | NA20805 | NA20806 |
| NA20807 | NA20808 | NA20809 | NA20810 | NA20811 | NA20812 |
| NA20813 | NA20814 | NA20815 | NA20816 | NA20818 | NA20819 |
| NA20826 | NA20828 |         |         |         |         |

---

**SPANISH**

**Iberian populations in Spain. (IBS)**

|         |         |         |         |         |         |
|---------|---------|---------|---------|---------|---------|
| HG01515 | HG01516 | HG01518 | HG01519 | HG01521 | HG01522 |
| HG01617 | HG01618 | HG01619 | HG01620 | HG01623 | HG01624 |
| HG01625 | HG01626 |         |         |         |         |

---

**NORTH AMERICAN**

**Utah residents (CEPH) with Northern and Western European ancestry. (CEU)**

|         |         |         |         |         |         |
|---------|---------|---------|---------|---------|---------|
| NA06984 | NA06986 | NA06989 | NA06994 | NA07000 | NA07037 |
| NA07048 | NA07051 | NA07056 | NA07347 | NA07357 | NA10847 |
| NA10851 | NA11829 | NA11830 | NA11831 | NA11843 | NA11892 |
| NA11893 | NA11894 | NA11919 | NA11920 | NA11930 | NA11931 |
| NA11932 | NA11933 | NA11992 | NA11993 | NA11994 | NA11995 |
| NA12003 | NA12004 | NA12006 | NA12043 | NA12044 | NA12045 |
| NA12046 | NA12058 | NA12144 | NA12154 | NA12155 | NA12249 |
| NA12272 | NA12273 | NA12275 | NA12282 | NA12283 | NA12286 |
| NA12287 | NA12340 | NA12341 | NA12342 | NA12347 | NA12348 |
| NA12383 | NA12399 | NA12400 | NA12413 | NA12489 | NA12546 |
| NA12716 | NA12717 | NA12718 | NA12748 | NA12749 | NA12750 |
| NA12751 | NA12761 | NA12763 | NA12775 | NA12777 | NA12778 |
| NA12812 | NA12814 | NA12815 | NA12827 | NA12829 | NA12830 |
| NA12842 | NA12843 | NA12872 | NA12873 | NA12874 | NA12889 |
| NA12890 |         |         |         |         |         |

**Mexican Ancestry in Los Angeles, California. (MXL)**

|         |         |         |         |         |         |
|---------|---------|---------|---------|---------|---------|
| NA19648 | NA19651 | NA19652 | NA19654 | NA19655 | NA19657 |
| NA19660 | NA19661 | NA19663 | NA19664 | NA19672 | NA19675 |
| NA19676 | NA19678 | NA19679 | NA19681 | NA19682 | NA19684 |
| NA19685 | NA19716 | NA19717 | NA19719 | NA19720 | NA19722 |
| NA19723 | NA19725 | NA19726 | NA19728 | NA19729 | NA19731 |
| NA19732 | NA19734 | NA19735 | NA19737 | NA19738 | NA19740 |
| NA19741 | NA19746 | NA19747 | NA19749 | NA19750 | NA19752 |
| NA19753 | NA19755 | NA19756 | NA19758 | NA19759 | NA19761 |
| NA19762 | NA19764 | NA19770 | NA19771 | NA19773 | NA19774 |
| NA19776 | NA19777 | NA19779 | NA19780 | NA19782 | NA19783 |
| NA19785 | NA19786 | NA19788 | NA19789 | NA19794 | NA19795 |

**Puerto Rican in Puerto Rico. (PUR)**

|         |         |         |         |         |         |
|---------|---------|---------|---------|---------|---------|
| HG00553 | HG00554 | HG00637 | HG00638 | HG00640 | HG00641 |
| HG00731 | HG00732 | HG00734 | HG00736 | HG00737 | HG00740 |
| HG01047 | HG01048 | HG01051 | HG01052 | HG01055 | HG01060 |
| HG01061 | HG01066 | HG01067 | HG01069 | HG01070 | HG01072 |
| HG01073 | HG01075 | HG01079 | HG01080 | HG01082 | HG01083 |
| HG01085 | HG01095 | HG01097 | HG01098 | HG01101 | HG01102 |
| HG01104 | HG01105 | HG01107 | HG01108 | HG01167 | HG01168 |
| HG01170 | HG01171 | HG01173 | HG01174 | HG01176 | HG01183 |
| HG01187 | HG01188 | HG01190 | HG01191 | HG01197 | HG01198 |

---

HG01204

---

**SOUTH AMERICAN**

**Colombian in Medellin, Colombia. (CLM)**

|         |         |         |         |         |         |
|---------|---------|---------|---------|---------|---------|
| HG01112 | HG01113 | HG01124 | HG01125 | HG01133 | HG01134 |
| HG01136 | HG01137 | HG01140 | HG01148 | HG01149 | HG01250 |
| HG01251 | HG01257 | HG01259 | HG01271 | HG01272 | HG01274 |
| HG01275 | HG01277 | HG01278 | HG01342 | HG01344 | HG01345 |
| HG01350 | HG01351 | HG01353 | HG01354 | HG01356 | HG01357 |
| HG01359 | HG01360 | HG01365 | HG01366 | HG01374 | HG01375 |
| HG01377 | HG01378 | HG01383 | HG01384 | HG01389 | HG01390 |
| HG01437 | HG01440 | HG01441 | HG01455 | HG01456 | HG01461 |
| HG01462 | HG01465 | HG01488 | HG01489 | HG01491 | HG01492 |
| HG01494 | HG01495 | HG01497 | HG01498 | HG01550 | HG01551 |

---

**AFRICAN-AMERICAN**

**African Ancestry in Southwest US. (ASW)**

|         |         |         |         |         |         |
|---------|---------|---------|---------|---------|---------|
| NA19625 | NA19700 | NA19701 | NA19703 | NA19704 | NA19707 |
| NA19711 | NA19712 | NA19713 | NA19818 | NA19819 | NA19834 |
| NA19835 | NA19900 | NA19901 | NA19904 | NA19908 | NA19909 |
| NA19914 | NA19916 | NA19917 | NA19920 | NA19921 | NA19922 |
| NA19923 | NA19982 | NA19984 | NA19985 | NA20126 | NA20127 |
| NA20276 | NA20278 | NA20281 | NA20282 | NA20287 | NA20289 |
| NA20291 | NA20294 | NA20296 | NA20298 | NA20299 | NA20314 |
| NA20317 | NA20322 | NA20332 | NA20334 | NA20336 | NA20339 |
| NA20340 | NA20341 | NA20342 | NA20344 | NA20346 | NA20348 |
| NA20351 | NA20356 | NA20357 | NA20359 | NA20363 | NA20412 |
| NA20414 |         |         |         |         |         |

---

**AFRICAN**

**Luhya in Webuyo, Kenya. (LWK)**

|         |         |         |         |         |         |
|---------|---------|---------|---------|---------|---------|
| NA19020 | NA19028 | NA19035 | NA19036 | NA19038 | NA19041 |
| NA19044 | NA19046 | NA19307 | NA19308 | NA19309 | NA19310 |
| NA19311 | NA19312 | NA19313 | NA19315 | NA19316 | NA19317 |
| NA19318 | NA19319 | NA19321 | NA19324 | NA19327 | NA19328 |
| NA19331 | NA19332 | NA19334 | NA19338 | NA19346 | NA19347 |
| NA19350 | NA19351 | NA19352 | NA19355 | NA19359 | NA19360 |
| NA19371 | NA19372 | NA19373 | NA19374 | NA19375 | NA19376 |
| NA19377 | NA19379 | NA19380 | NA19381 | NA19382 | NA19383 |
| NA19384 | NA19385 | NA19390 | NA19391 | NA19393 | NA19394 |
| NA19395 | NA19396 | NA19397 | NA19398 | NA19399 | NA19401 |
| NA19403 | NA19404 | NA19428 | NA19429 | NA19430 | NA19431 |
| NA19434 | NA19435 | NA19436 | NA19437 | NA19438 | NA19439 |
| NA19440 | NA19443 | NA19444 | NA19445 | NA19446 | NA19448 |
| NA19449 | NA19451 | NA19452 | NA19453 | NA19455 | NA19456 |
| NA19457 | NA19461 | NA19462 | NA19463 | NA19466 | NA19467 |
| NA19468 | NA19469 | NA19470 | NA19471 | NA19472 | NA19473 |
| NA19474 |         |         |         |         |         |

**Yoruba in Ibadan, Nigeria. (YRI)**

|         |         |         |         |         |         |
|---------|---------|---------|---------|---------|---------|
| NA18486 | NA18487 | NA18489 | NA18498 | NA18499 | NA18501 |
| NA18502 | NA18504 | NA18505 | NA18507 | NA18508 | NA18510 |
| NA18511 | NA18516 | NA18517 | NA18519 | NA18520 | NA18522 |
| NA18523 | NA18853 | NA18856 | NA18858 | NA18861 | NA18867 |

---

|         |         |         |         |         |         |
|---------|---------|---------|---------|---------|---------|
| NA18868 | NA18870 | NA18871 | NA18873 | NA18874 | NA18907 |
| NA18908 | NA18909 | NA18910 | NA18912 | NA18916 | NA18917 |
| NA18923 | NA18924 | NA18933 | NA18934 | NA19093 | NA19095 |
| NA19096 | NA19098 | NA19099 | NA19102 | NA19107 | NA19108 |
| NA19113 | NA19114 | NA19116 | NA19117 | NA19118 | NA19119 |
| NA19121 | NA19129 | NA19130 | NA19131 | NA19137 | NA19138 |
| NA19146 | NA19147 | NA19149 | NA19150 | NA19152 | NA19160 |
| NA19171 | NA19172 | NA19175 | NA19185 | NA19189 | NA19190 |
| NA19197 | NA19198 | NA19200 | NA19204 | NA19207 | NA19209 |
| NA19213 | NA19222 | NA19223 | NA19225 | NA19235 | NA19236 |
| NA19247 | NA19248 | NA19256 | NA19257 |         |         |

---

## STATISTICS

Mutation ID: rs2074435

Ancestral Allele: T

Ancestral Amino Acid: L

Mutations Type: (T/A)

Amino acid change: L→Q

Overall, 581 individuals have mutation at (36594659). Highlighted (yellow) individuals have derived allele (homozygous (0|0) genotype).

### **Total individuals of corresponding populations**

**CHB + CHS + JPT + FIN + GBR + TSI + IBS + CEU + CLM + MXL + PUR + ASW + LWK + YRI**  
 97 + 100 + 89 + 93 + 89 + 98 + 14 + 85 + 60 + 66 + 55 + 61 + 97 + 88 = 1092

**CHB + CHS + JPT + FIN + GBR + TSI + IBS + CEU + CLM + MXL + PUR + ASW + LWK + YRI**  
 64 + 65 + 57 + 27 + 38 + 42 + 4 + 34 + 30 + 37 + 20 + 32 + 70 + 61 = 581 1/1

**CHB + CHS + JPT + FIN + GBR + TSI + IBS + CEU + CLM + MXL + PUR + ASW + LWK + YRI**  
 4 + 8 + 1 + 11 + 5 + 16 + 1 + 13 + 9 + 4 + 2 + 0 + 1 + 1 = 76 0/0

**CHB + CHS + JPT + FIN + GBR + TSI + IBS + CEU + CLM + MXL + PUR + ASW + LWK + YRI**  
 29 + 27 + 31 + 55 + 46 + 40 + 9 + 38 + 21 + 25 + 33 + 29 + 26 + 26 = 435 1/0, 0/1



**Supplementary Table 4** Status of rs1008328 in fourteen population of 1000 Genome Project

---

**CHINESE****Han Chinese in Beijing, China. (CHB)**

|         |         |         |         |         |         |
|---------|---------|---------|---------|---------|---------|
| NA18525 | NA18526 | NA18527 | NA18528 | NA18530 | NA18532 |
| NA18534 | NA18535 | NA18536 | NA18537 | NA18538 | NA18539 |
| NA18541 | NA18542 | NA18543 | NA18544 | NA18545 | NA18546 |
| NA18547 | NA18548 | NA18549 | NA18550 | NA18552 | NA18553 |
| NA18555 | NA18557 | NA18558 | NA18559 | NA18560 | NA18561 |
| NA18562 | NA18563 | NA18564 | NA18565 | NA18566 | NA18567 |
| NA18570 | NA18571 | NA18572 | NA18573 | NA18574 | NA18576 |
| NA18577 | NA18579 | NA18582 | NA18592 | NA18593 | NA18595 |
| NA18596 | NA18597 | NA18599 | NA18602 | NA18603 | NA18605 |
| NA18606 | NA18608 | NA18609 | NA18610 | NA18611 | NA18612 |
| NA18613 | NA18614 | NA18615 | NA18616 | NA18617 | NA18618 |
| NA18619 | NA18620 | NA18621 | NA18622 | NA18623 | NA18624 |
| NA18626 | NA18627 | NA18628 | NA18630 | NA18631 | NA18632 |
| NA18633 | NA18634 | NA18635 | NA18636 | NA18637 | NA18638 |
| NA18639 | NA18640 | NA18641 | NA18642 | NA18643 | NA18645 |
| NA18647 | NA18740 | NA18745 | NA18747 | NA18748 | NA18749 |
| NA18757 |         |         |         |         |         |

**Han Chinese South. (CHS)**

|         |         |         |         |         |         |
|---------|---------|---------|---------|---------|---------|
| HG00403 | HG00404 | HG00406 | HG00407 | HG00418 | HG00419 |
| HG00421 | HG00422 | HG00427 | HG00428 | HG00436 | HG00437 |
| HG00442 | HG00443 | HG00445 | HG00446 | HG00448 | HG00449 |
| HG00451 | HG00452 | HG00457 | HG00458 | HG00463 | HG00464 |
| HG00472 | HG00473 | HG00475 | HG00476 | HG00478 | HG00479 |
| HG00500 | HG00501 | HG00512 | HG00513 | HG00524 | HG00525 |
| HG00530 | HG00531 | HG00533 | HG00534 | HG00536 | HG00537 |
| HG00542 | HG00543 | HG00556 | HG00557 | HG00559 | HG00560 |
| HG00565 | HG00566 | HG00577 | HG00578 | HG00580 | HG00581 |
| HG00583 | HG00584 | HG00589 | HG00590 | HG00592 | HG00593 |
| HG00595 | HG00596 | HG00607 | HG00608 | HG00610 | HG00611 |
| HG00613 | HG00614 | HG00619 | HG00620 | HG00625 | HG00626 |
| HG00628 | HG00629 | HG00634 | HG00635 | HG00650 | HG00651 |
| HG00653 | HG00654 | HG00656 | HG00657 | HG00662 | HG00663 |
| HG00671 | HG00672 | HG00683 | HG00684 | HG00689 | HG00690 |
| HG00692 | HG00693 | HG00698 | HG00699 | HG00701 | HG00702 |
| HG00704 | HG00705 | HG00707 | HG00708 |         |         |

---

**JAPANESE****Japanese population in Tokyo, Japan. (JPT)**

|         |         |         |         |         |         |
|---------|---------|---------|---------|---------|---------|
| NA18939 | NA18940 | NA18941 | NA18942 | NA18943 | NA18944 |
| NA18945 | NA18946 | NA18947 | NA18948 | NA18949 | NA18950 |
| NA18951 | NA18952 | NA18953 | NA18954 | NA18956 | NA18957 |
| NA18959 | NA18960 | NA18961 | NA18962 | NA18963 | NA18964 |
| NA18965 | NA18966 | NA18968 | NA18971 | NA18973 | NA18974 |
| NA18975 | NA18976 | NA18977 | NA18978 | NA18980 | NA18981 |
| NA18982 | NA18983 | NA18984 | NA18985 | NA18986 | NA18987 |
| NA18988 | NA18989 | NA18990 | NA18992 | NA18994 | NA18995 |
| NA18998 | NA18999 | NA19000 | NA19002 | NA19003 | NA19004 |
| NA19005 | NA19007 | NA19009 | NA19010 | NA19012 | NA19054 |
| NA19055 | NA19056 | NA19057 | NA19058 | NA19059 | NA19060 |

---

|                |         |         |         |         |                |
|----------------|---------|---------|---------|---------|----------------|
| NA19062        | NA19063 | NA19064 | NA19065 | NA19066 | NA19067        |
| <b>NA19068</b> | NA19070 | NA19072 | NA19074 | NA19075 | NA19076        |
| NA19077        | NA19078 | NA19079 | NA19080 | NA19081 | <b>NA19082</b> |
| NA19083        | NA19084 | NA19085 | NA19087 | NA19088 |                |

---

## NORTH EUROPEAN

### Finnish in Finland. (FIN)

|                |         |                |                |                |         |
|----------------|---------|----------------|----------------|----------------|---------|
| HG00171        | HG00173 | HG00174        | HG00176        | HG00177        | HG00178 |
| HG00179        | HG00180 | HG00182        | HG00183        | <b>HG00185</b> | HG00186 |
| HG00187        | HG00188 | HG00189        | HG00190        | HG00266        | HG00267 |
| HG00268        | HG00269 | HG00270        | HG00271        | HG00272        | HG00273 |
| HG00274        | HG00275 | <b>HG00276</b> | <b>HG00277</b> | HG00278        | HG00280 |
| HG00281        | HG00282 | HG00284        | HG00285        | HG00306        | HG00309 |
| HG00310        | HG00311 | HG00312        | HG00313        | HG00315        | HG00318 |
| HG00319        | HG00320 | HG00321        | HG00323        | HG00324        | HG00325 |
| HG00326        | HG00327 | HG00328        | HG00329        | HG00330        | HG00331 |
| HG00332        | HG00334 | HG00335        | HG00336        | HG00337        | HG00338 |
| HG00339        | HG00341 | HG00342        | HG00343        | HG00344        | HG00345 |
| HG00346        | HG00349 | HG00350        | HG00351        | HG00353        | HG00355 |
| HG00356        | HG00357 | HG00358        | HG00359        | HG00360        | HG00361 |
| HG00362        | HG00364 | HG00366        | HG00367        | HG00369        | HG00372 |
| HG00373        | HG00375 | HG00376        | HG00377        | HG00378        | HG00381 |
| <b>HG00382</b> | HG00383 | HG00384        |                |                |         |

### British in England and Scotland. (GBR)

|         |                |         |                |                |         |
|---------|----------------|---------|----------------|----------------|---------|
| HG00096 | HG00097        | HG00099 | HG00100        | HG00101        | HG00102 |
| HG00103 | HG00104        | HG00106 | <b>HG00108</b> | HG00109        | HG00110 |
| HG00111 | HG00112        | HG00113 | HG00114        | HG00116        | HG00117 |
| HG00118 | HG00119        | HG00120 | HG00121        | HG00122        | HG00123 |
| HG00124 | HG00125        | HG00126 | HG00127        | <b>HG00128</b> | HG00129 |
| HG00130 | HG00131        | HG00133 | HG00134        | HG00135        | HG00136 |
| HG00137 | HG00138        | HG00139 | HG00140        | HG00141        | HG00142 |
| HG00143 | HG00146        | HG00148 | HG00149        | HG00150        | HG00151 |
| HG00152 | HG00154        | HG00155 | HG00156        | HG00158        | HG00159 |
| HG00160 | <b>HG00231</b> | HG00232 | HG00233        | HG00234        | HG00235 |
| HG00236 | HG00237        | HG00238 | HG00239        | HG00240        | HG00242 |
| HG00243 | HG00244        | HG00245 | HG00246        | HG00247        | HG00249 |
| HG00250 | HG00251        | HG00252 | HG00253        | HG00254        | HG00255 |
| HG00256 | HG00257        | HG00258 | HG00259        | HG00260        | HG00261 |
| HG00262 | HG00263        | HG00264 | HG00265        | HG01334        |         |

---

## ITALIAN

### Toscani in Italia. (TSI)

|         |                |                |         |                |         |
|---------|----------------|----------------|---------|----------------|---------|
| NA20502 | NA20503        | NA20504        | NA20505 | NA20506        | NA20507 |
| NA20508 | NA20509        | NA20510        | NA20512 | NA20513        | NA20515 |
| NA20516 | NA20517        | NA20518        | NA20519 | NA20520        | NA20521 |
| NA20522 | <b>NA20524</b> | NA20525        | NA20527 | NA20528        | NA20529 |
| NA20530 | NA20531        | <b>NA20532</b> | NA20533 | NA20534        | NA20535 |
| NA20536 | NA20537        | NA20538        | NA20539 | NA20540        | NA20541 |
| NA20542 | NA20543        | <b>NA20544</b> | NA20581 | NA20582        | NA20585 |
| NA20586 | NA20588        | NA20589        | NA20752 | <b>NA20753</b> | NA20754 |
| NA20755 | NA20756        | NA20757        | NA20758 | NA20759        | NA20760 |
| NA20761 | NA20765        | NA20766        | NA20768 | NA20769        | NA20770 |
| NA20771 | NA20772        | NA20773        | NA20774 | NA20775        | NA20778 |

---

|         |         |         |         |         |         |
|---------|---------|---------|---------|---------|---------|
| NA20783 | NA20785 | NA20786 | NA20787 | NA20790 | NA20792 |
| NA20795 | NA20796 | NA20797 | NA20798 | NA20799 | NA20800 |
| NA20801 | NA20802 | NA20803 | NA20804 | NA20805 | NA20806 |
| NA20807 | NA20808 | NA20809 | NA20810 | NA20811 | NA20812 |
| NA20813 | NA20814 | NA20815 | NA20816 | NA20818 | NA20819 |
| NA20826 | NA20828 |         |         |         |         |

---

**SPANISH**

**Iberian populations in Spain. (IBS)**

|         |         |         |         |         |         |
|---------|---------|---------|---------|---------|---------|
| HG01515 | HG01516 | HG01518 | HG01519 | HG01521 | HG01522 |
| HG01617 | HG01618 | HG01619 | HG01620 | HG01623 | HG01624 |
| HG01625 | HG01626 |         |         |         |         |

---

**NORTH AMERICAN**

**Utah residents (CEPH) with Northern and Western European ancestry. (CEU)**

|         |         |         |         |         |         |
|---------|---------|---------|---------|---------|---------|
| NA06984 | NA06986 | NA06989 | NA06994 | NA07000 | NA07037 |
| NA07048 | NA07051 | NA07056 | NA07347 | NA07357 | NA10847 |
| NA10851 | NA11829 | NA11830 | NA11831 | NA11843 | NA11892 |
| NA11893 | NA11894 | NA11919 | NA11920 | NA11930 | NA11931 |
| NA11932 | NA11933 | NA11992 | NA11993 | NA11994 | NA11995 |
| NA12003 | NA12004 | NA12006 | NA12043 | NA12044 | NA12045 |
| NA12046 | NA12058 | NA12144 | NA12154 | NA12155 | NA12249 |
| NA12272 | NA12273 | NA12275 | NA12282 | NA12283 | NA12286 |
| NA12287 | NA12340 | NA12341 | NA12342 | NA12347 | NA12348 |
| NA12383 | NA12399 | NA12400 | NA12413 | NA12489 | NA12546 |
| NA12716 | NA12717 | NA12718 | NA12748 | NA12749 | NA12750 |
| NA12751 | NA12761 | NA12763 | NA12775 | NA12777 | NA12778 |
| NA12812 | NA12814 | NA12815 | NA12827 | NA12829 | NA12830 |
| NA12842 | NA12843 | NA12872 | NA12873 | NA12874 | NA12889 |
| NA12890 |         |         |         |         |         |

**Mexican Ancestry in Los Angeles, California. (MXL)**

|         |         |         |         |         |         |
|---------|---------|---------|---------|---------|---------|
| NA19648 | NA19651 | NA19652 | NA19654 | NA19655 | NA19657 |
| NA19660 | NA19661 | NA19663 | NA19664 | NA19672 | NA19675 |
| NA19676 | NA19678 | NA19679 | NA19681 | NA19682 | NA19684 |
| NA19685 | NA19716 | NA19717 | NA19719 | NA19720 | NA19722 |
| NA19723 | NA19725 | NA19726 | NA19728 | NA19729 | NA19731 |
| NA19732 | NA19734 | NA19735 | NA19737 | NA19738 | NA19740 |
| NA19741 | NA19746 | NA19747 | NA19749 | NA19750 | NA19752 |
| NA19753 | NA19755 | NA19756 | NA19758 | NA19759 | NA19761 |
| NA19762 | NA19764 | NA19770 | NA19771 | NA19773 | NA19774 |
| NA19776 | NA19777 | NA19779 | NA19780 | NA19782 | NA19783 |
| NA19785 | NA19786 | NA19788 | NA19789 | NA19794 | NA19795 |

**Puerto Rican in Puerto Rico. (PUR)**

|         |         |         |         |         |         |
|---------|---------|---------|---------|---------|---------|
| HG00553 | HG00554 | HG00637 | HG00638 | HG00640 | HG00641 |
| HG00731 | HG00732 | HG00734 | HG00736 | HG00737 | HG00740 |
| HG01047 | HG01048 | HG01051 | HG01052 | HG01055 | HG01060 |
| HG01061 | HG01066 | HG01067 | HG01069 | HG01070 | HG01072 |
| HG01073 | HG01075 | HG01079 | HG01080 | HG01082 | HG01083 |
| HG01085 | HG01095 | HG01097 | HG01098 | HG01101 | HG01102 |
| HG01104 | HG01105 | HG01107 | HG01108 | HG01167 | HG01168 |
| HG01170 | HG01171 | HG01173 | HG01174 | HG01176 | HG01183 |
| HG01187 | HG01188 | HG01190 | HG01191 | HG01197 | HG01198 |

---

HG01204

---

**SOUTH AMERICAN**

**Colombian in Medellin, Colombia. (CLM)**

|         |         |         |         |                |                |
|---------|---------|---------|---------|----------------|----------------|
| HG01112 | HG01113 | HG01124 | HG01125 | HG01133        | HG01134        |
| HG01136 | HG01137 | HG01140 | HG01148 | HG01149        | HG01250        |
| HG01251 | HG01257 | HG01259 | HG01271 | HG01272        | HG01274        |
| HG01275 | HG01277 | HG01278 | HG01342 | HG01344        | HG01345        |
| HG01350 | HG01351 | HG01353 | HG01354 | HG01356        | HG01357        |
| HG01359 | HG01360 | HG01365 | HG01366 | HG01374        | HG01375        |
| HG01377 | HG01378 | HG01383 | HG01384 | HG01389        | <b>HG01390</b> |
| HG01437 | HG01440 | HG01441 | HG01455 | <b>HG01456</b> | HG01461        |
| HG01462 | HG01465 | HG01488 | HG01489 | HG01491        | HG01492        |
| HG01494 | HG01495 | HG01497 | HG01498 | HG01550        | HG01551        |

---

**AFRICAN-AMERICAN**

**African Ancestry in Southwest US. (ASW)**

|         |                |         |         |         |                |
|---------|----------------|---------|---------|---------|----------------|
| NA19625 | NA19700        | NA19701 | NA19703 | NA19704 | NA19707        |
| NA19711 | NA19712        | NA19713 | NA19818 | NA19819 | NA19834        |
| NA19835 | NA19900        | NA19901 | NA19904 | NA19908 | NA19909        |
| NA19914 | NA19916        | NA19917 | NA19920 | NA19921 | <b>NA19922</b> |
| NA19923 | NA19982        | NA19984 | NA19985 | NA20126 | NA20127        |
| NA20276 | NA20278        | NA20281 | NA20282 | NA20287 | NA20289        |
| NA20291 | NA20294        | NA20296 | NA20298 | NA20299 | NA20314        |
| NA20317 | NA20322        | NA20332 | NA20334 | NA20336 | NA20339        |
| NA20340 | NA20341        | NA20342 | NA20344 | NA20346 | NA20348        |
| NA20351 | <b>NA20356</b> | NA20357 | NA20359 | NA20363 | NA20412        |
| NA20414 |                |         |         |         |                |

---

**AFRICAN**

**Luhya in Webuyo, Kenya. (LWK)**

|                |                |                |                |                |                |
|----------------|----------------|----------------|----------------|----------------|----------------|
| NA19020        | NA19028        | NA19035        | NA19036        | NA19038        | NA19041        |
| <b>NA19044</b> | NA19046        | NA19307        | NA19308        | NA19309        | NA19310        |
| NA19311        | NA19312        | NA19313        | NA19315        | NA19316        | NA19317        |
| NA19318        | NA19319        | NA19321        | NA19324        | NA19327        | NA19328        |
| NA19331        | NA19332        | NA19334        | NA19338        | NA19346        | NA19347        |
| NA19350        | NA19351        | NA19352        | NA19355        | <b>NA19359</b> | NA19360        |
| NA19371        | NA19372        | NA19373        | NA19374        | NA19375        | NA19376        |
| NA19377        | <b>NA19379</b> | <b>NA19380</b> | <b>NA19381</b> | <b>NA19382</b> | NA19383        |
| NA19384        | <b>NA19385</b> | NA19390        | NA19391        | NA19393        | NA19394        |
| NA19395        | NA19396        | NA19397        | NA19398        | NA19399        | NA19401        |
| NA19403        | NA19404        | NA19428        | NA19429        | NA19430        | NA19431        |
| NA19434        | NA19435        | NA19436        | NA19437        | NA19438        | <b>NA19439</b> |
| NA19440        | NA19443        | NA19444        | NA19445        | NA19446        | NA19448        |
| NA19449        | NA19451        | NA19452        | NA19453        | NA19455        | <b>NA19456</b> |
| <b>NA19457</b> | NA19461        | NA19462        | NA19463        | NA19466        | NA19467        |
| NA19468        | NA19469        | NA19470        | NA19471        | NA19472        | NA19473        |
| NA19474        |                |                |                |                |                |

**Yoruba in Ibadan, Nigeria. (YRI)**

|                |         |         |                |         |         |
|----------------|---------|---------|----------------|---------|---------|
| <b>NA18486</b> | NA18487 | NA18489 | NA18498        | NA18499 | NA18501 |
| NA18502        | NA18504 | NA18505 | NA18507        | NA18508 | NA18510 |
| NA18511        | NA18516 | NA18517 | <b>NA18519</b> | NA18520 | NA18522 |
| NA18523        | NA18853 | NA18856 | NA18858        | NA18861 | NA18867 |

---

|         |         |         |         |         |         |
|---------|---------|---------|---------|---------|---------|
| NA18868 | NA18870 | NA18871 | NA18873 | NA18874 | NA18907 |
| NA18908 | NA18909 | NA18910 | NA18912 | NA18916 | NA18917 |
| NA18923 | NA18924 | NA18933 | NA18934 | NA19093 | NA19095 |
| NA19096 | NA19098 | NA19099 | NA19102 | NA19107 | NA19108 |
| NA19113 | NA19114 | NA19116 | NA19117 | NA19118 | NA19119 |
| NA19121 | NA19129 | NA19130 | NA19131 | NA19137 | NA19138 |
| NA19146 | NA19147 | NA19149 | NA19150 | NA19152 | NA19160 |
| NA19171 | NA19172 | NA19175 | NA19185 | NA19189 | NA19190 |
| NA19197 | NA19198 | NA19200 | NA19204 | NA19207 | NA19209 |
| NA19213 | NA19222 | NA19223 | NA19225 | NA19235 | NA19236 |
| NA19247 | NA19248 | NA19256 | NA19257 |         |         |

---

## STATISTICS

Mutation ID: rs1008328

Ancestral Allele: C

Ancestral Amino Acid: F

Mutations Type: (C/A)

Amino acid change: F→L

Overall, 639 individuals have mutation at (36595436). Highlighted (yellow) individuals have derived allele (homozygous (0|0) genotype).

### Total individuals of corresponding populations

**CHB + CHS + JPT + FIN + GBR + TSI + IBS + CEU + CLM + MXL + PUR + ASW + LWK + YRI**  
 97 + 100 + 89 + 93 + 89 + 98 + 14 + 85 + 60 + 66 + 55 + 61 + 97 + 88 = 1092

**CHB + CHS + JPT + FIN + GBR + TSI + IBS + CEU + CLM + MXL + PUR + ASW + LWK + YRI**  
 62 + 62 + 56 + 50 + 56 + 59 + 9 + 57 + 37 + 40 + 30 + 29 + 53 + 39 = 639 1/1

**CHB + CHS + JPT + FIN + GBR + TSI + IBS + CEU + CLM + MXL + PUR + ASW + LWK + YRI**  
 7 + 5 + 3 + 4 + 3 + 4 + 1 + 6 + 2 + 5 + 2 + 2 + 10 + 6 = 60 0/0

**CHB + CHS + JPT + FIN + GBR + TSI + IBS + CEU + CLM + MXL + PUR + ASW + LWK + YRI**  
 28 + 33 + 30 + 39 + 30 + 35 + 4 + 22 + 21 + 21 + 23 + 30 + 34 + 43 = 393 1/0, 0/1

# Supplementary Material Data 1

## Complete list of protein sequences used in this study

>Homo Sapiens\_WDR62

MAAVGSGGYARNNDAGEKLPVSMAGVPARRGQSSPPPPAPPICLRRRTRLSTASEETVQNRV  
SLEKVLGITAQNSSGLTCDPGTGHVAYLAGCVVILDPKENKQQHIFNTARKSLSALAFS  
PDGKYIVTGENGHRPAVRIWDVEEKNQVAEMLGHKYGVACVAFSPNMKHIVSMGYQHDMV  
LNVVDWKKDIVVASNKVSCRVIALLSFSEDSSYFVTVGNRHVRVFWFLEVSTETKVTSTVPL  
VGRSGILGELHNNIFCGVACGRGRMAGSTFCVSYSGLLCQFNEKRVLEKWINLKVSLSSC  
LCVSQLIFCGCTDGIIVRIFQAHSLHYLANLPKPHYLGVDAQGLEPSFLFHRKAEAVYP  
DTVALTFDPIHQWLSVYKDHISIYIWDVKDINRVGKVVSELFHSSYVWNVEVYPEFEDQR  
ACLPSGSFLTCSNDNTIRFWNLDSPPDSHWQKNIFSNLTKLVVYVENDIQHLQDMSHFDP  
RGENGTPMDVKAGVRVMQVSPDGQHLASGDRSGNLRHELHFMDELVKVEAHDAEVLCL  
EYSKPETGLTLLASASRDRLIHVLNVEKNYNLEQTLDDHSSSITAIFAGNRDIQMISCG  
ADKSIYFRSAQQGSDGLHFVVRTHHVAEKTTLTYDMDIDITQKYVAVACQDRNVRVYNTVNG  
KQKKCYKGSQDDEGSLKLVHVDPSGTFLATSCSDKSI SVIDFYSGECIAKMFHSEIITS  
MKFTYDCHHLITVSGDSCVFIWHLGPEITNCMKQHLLLEIDHRQQQHTNDKKRSGHPRQD  
TYVSTPSEIHSLSPEQTEDDLEEECEPEEMLKTPSKDSLDPDRCLLTNGKLPWAKRL  
LGDDDDVADGLAFHAKRSYQPHGRWAERAGQEPLKTIILDAQDLDCYFTPMKPESLENSILD  
SLEPQSLASLLSESESPQEAGRHPGFPLPQKESSEASELILYSLEAEVTVTGTDSQYCR  
KEVEAGPGDQQGDSYLRVSSDSPKDQSPPEDSGESEADLECSFAAIHSPAPPPDPAPRFA  
TSLPHFPGCAGPTEDELSLPEGPSVPSSSLPQTPEQEKFLRHHFETLTESPCRELFPAAL  
GDVEASEAEDHFFNPRLSISTQFLSSLQKASRFTHTFPPRATQCLVKSPPEVKLMDRGGSQ  
PRAGTGYASPDTRTHVLAAGKAEETLEAWRPPPPCLTSLASCVPASSVLPTDRNLPTPTSA  
PTPGLAQGVHAPSTCSYMEATASSRARI SRSISLGDSEGP IVATLAQPLRRPSSVGE LAS  
LGQELQAITTATTPSLDSEGQEPALRSWGNHEARANLRLTLSSACDGLLQPPVDTQPGVT  
VPAVSFPAPSPVEESALRLHGSAPRPSLPAPESPGLPAHPSNPQLPEARPGIPGGTASLL  
EPTSGALGLLQGSAPRWSEPVVPEALPPSPLELSRVGNILHRLQTTTFQEALDLYRVLVS  
SGQVDTGQQQARTELVSTFLWIHSQLEAECLVGTSVAPAQALPSPGPPSPPTLYPLASPD  
LQALLEHYSELLVQAVRRKARGH

>Neandertals\_WDR62

MAAVGSGGYARNNDAGEKLPVSMAGVPARRGQSSPPPPAPPICLRRRTRLSTASEETVQNRV  
SLEKVLGITAQNSSGLTCDPGTGHVAYLAGCVVILDPKENKQQHIFNTARKSLSALAFS  
PDGKYIVTGENGHRPAVRIWDVEEKNQVAEMLGHKYGVACVAFSPNMKHIVSMGYQHDMV  
LNVVDWKKDIVVASNKVSCRVIALLSFSEDSSYFVTVGNRHVRVFWFLEVSTETKVTSTVPL  
VGRSGILGELHNNIFCGVACGRGRMAGSTFCVSYSGLLCQFNEKRVLEKWINLKVSLSSC  
LCVSQLIFCGCTDGIIVRIFQAHSLHYLANLPKPHYLGVDAQGLEPSFLFHRKAEAVYP  
DTVALTFDPIHQWLSVYKDHISIYIWDVKDINRVGKVVSELFHSSYVWNVEVYPEFEDQR  
ACLPSGSFLTCSNDNTIRFWNLDSPPDSHWQKNIFSNLTKLVVYVENDIQHLQDMSHFDP  
RGENGTPMDVKAGVRVMQVSPDGQHLASGDRSGNLRHELHFMDELVKVEAHDAEVLCL  
EYSKPETGLTLLASASRDRLIHVLNVEKNYNLEQTLDDHSSSITAIFAGNRDIQMISCG  
ADKSIYFRSAQQGSDGLHFVVRTHHVAEKTTLTYDMDIDITQKYVAVACQDRNVRVYNTVNG  
KQKKCYKGSQDDEGSLKLVHVDPSGTFLATSCSDKSI SVIDFYSGECIAKMFHSEIITS  
MKFTYDCHHLITVSGDSCVFIWHLGPEITNCMKQHLLLEIDHRQQQHTNDKKRSGHPRQD  
TYVSTPSEIHSLSPEQTEDDLEEECEPEEMLKTPSKDSLDPDRCLLTNGKLPWAKRL  
LGDDDDVADGLAFHAKRSYQPHGRWAERAGQEPLKTIILDAQDLDCYFTPMKPESLENSILD  
SLEPQSLASLLSESESPQEAGRHPGFPLPQKESSEASELILYSLEAEVTVTGTDSQYCR  
KEVEAGPGDQQGDSYLRVSSDSPKDQSPPEDSGESEADLECSFAAIHSPAPPPDPAPRFA  
TSLPHFPGCAGPTEDELSLPEGPSVPSSSLPQTPEQEKFLRHHFETLTESPCRELFPAAL  
GDVEASEAEDHFFNPRLSISTQFLSSLQKASRFTHTFPPRATQCLVKSPPEVKLMDRGGSQ  
PRAGTGYASPDTRTHVLAAGKAEETLEAWRPPPPCLTSLASCVPASSVLPTDRNLPTPTSA  
PTPGLAQGVHAPSTCSYMEATASSRARI SRSISLGDSEGP IVATLAQPLRRPSSVGE LAS

LGQELQAITTATTPSLDSEGQEPALRSWGNHEARANLRLTLSSACDGLLLPPVDTQPGVT  
VPAVSFPAPSPVEESALRLHGSAFRPSLPAPESPGLPAHPSNPQLPEARPGIPGGTASLL  
EPTSGALGLFQGSPARWSEPWPVEALPPSPLELSRVGNILHRLQTTTFQEALDLYRVLVS  
SGQVDTGQQQARTELVSTFLWIHSQLEAECLVGTSVAPAQALPSPGPPSPPTLYPLASPD  
LQALLEHYSELLVQAVRRKARGH

>Denisovans\_WDR62

MAAVGSGGYARNNDAGEKLPVSMAGVPARRGQSSPPPAPPICLRRRTRLSTASEETVQNRV  
SLEKVLGITAQNSSGLTCDPGTGHVAYLAGCVVILDPKENKQQHIFNTARKSL SALAFS  
PDGKYIVTGENGHRPAVRIWDVEEKNQVAEMLGHKYGVACVAFSPNMKHIVSMGYQHDMV  
LNVWDWKKDIVVASNKVSCRVI ALSFSEDSSYFVTVGNRHVRFWFLEVSTETKVTSTVPL  
VGRSGILGELHNNIFCGVACGRGRMAGSTFCVSYSGLLCQFNEKRVLEKWINLKVSLSSC  
LCV SQELIFCGCTDGIVRIFQAHS LHYLANLPKPHYLGVDVAQGLEPSFLFHRKAEAVYP  
DTVALTFDPIHQWLS CVYKDHSIYIWDVKDINRVGKVVSELFHSSYVWNVEVYPEFEDQR  
ACLPSGSFLTCSNDNTIRFWNLDS SPDSHWQKNIFSNTLLKVVYVENDIQHLQDMSHFDP  
RGENGT PMDVKAGVRVMQVSPDGQH LASGDRSGNLR IHELHFMDLVKVEAHDAEVLCL  
EYKSKPETGLTLLASASRDRLIHVLNVEKNYNLEQTLDDHSSSITAIKFAGNRDIQMISCG  
ADKSIYFRSAQQGSDGLHFVVRTHHVAEKTTLYDMDIDITQKYVAVACQDRNVRVYNTVNG  
KQKKCYKGSQGD EGSLKVVHVDPSGTFLATSCSDKSI SVIDFYSGECIAKMFHSEIITS  
MKFTYDCHHLITVSGDSCVFIWHLGPEITNCMKQHLL EIDHRQQQHTNDKKRSGHPRQD  
TYVSTPSEIHSLS PGEQTEDDLEEECEPEEMLKTPSKDSLDPDPRCLLTNGKLP LWAKRL  
LGDDD VADGLAFHAKRSYQPHGRWAERAGQEPLKTI LDAQDLDCYFTPMKPESLENSILD  
SLEPQSLASLLSESESPQEAGRGHPSFLPQQKESSEASELILYSLEAEVTVTGTDSQYCR  
KEVEAGPGDQQGDSYLRVSSDSPKDQSPPEDSGESEADLECSFAAIHSPAPPPDPAPRFA  
TSLPHFPGCAGPTEDEL SLPEGPSVPSSSLPQTPEQEKFLRHHFETLTESPCRELFPAAL  
GDVEASEAEDHFFNRLSISTQFLSSLQKASRFTHTFPPRATQCLVKSPPEVKLMDRGGSQ  
PRAGTGYASPDRTHVLAAGKAEETLEAWRPPPPCLTSLASCVPASSVLP TDRNLPTPTSA  
PTPGLAQGVHAPSTCSYMEATASSRARI SRSISLGDSEGP IVATLAQPLRRPSSV GELAS  
LGQELQAITTATTPSLDSEGQEPALRSWGNHEARANLRLTLSSACDGLLLPPVDTQPGVT  
VPAVSFPAPSPVEESALRLHGSAFRPSLPAPESPGLPAHPSNPQLPEARPGIPGGTASLL  
EPTSGALGLFQGSPARWSEPWPVEALPPSPLELSRVGNILHRLQTTTFQEALDLYRVLVS  
SGQVDTGQQQARTELVSTFLWIHSQLEAECLVGTSVAPAQALPSPGPPSPPTLYPLASPD  
LQALLEHYSELLVQAVRRKARGH

>Pan paniscus\_WDR62

MAAVGSGGYARNNDAGEKLPVSMAGVPARRGQSSPPPAPPICLRRRTRLSTASEETVQNRV  
SLEKVLGITAQNSSGLTCDPSTGHVAYLAGCVVILDPKENKQQHIFNTARKSL SALAFS  
PDGKYIVTGENGHRPAVRIWDVEEKNQVAEMLGHKYGVACVAFSPNMKHIVSMGYQHDMV  
LNVWDWKKDIVVASNKVSCRVI ALSFSEDSSYFVTVGNRHVRFWFLEVSTETKVTSTVPL  
VGRSGILGELHNNIFCGVACGRGRMAGSTFCVSYSGLLCQFNEKRVLEKWINLKVSLSSC  
LCV SQELIFCGCTDGIVRIFQAHS LHYLANLPKPHYLGVDVAQGLEPSFLFHRKAEAVYP  
DTVALTFDPIHQWLS CVYKDHSIYIWDVKDINGVGVVSELFHSSYVWNVEVYPEFEDQR  
ACLPSGSFLTCSNDNTIRFWNLDS SPDSHWQKNIFSNTLLKVVYVENDIQHLQDMSHFDP  
RGENGT PMDVKAGVRVMQVSPDGQH LASGDRSGNLR IHELHFMDLVKVEAHDAEVLCL  
EYKSKPETGLTLLASASRDRLIHVLNVEKNYNLEQTLDDHSSSITAIKFAGNRDIQMISCG  
ADKSIYFRSAQQGSDGLHFVVRTHHVAEKTTLYDMDIDITQKYVAVACQDRNVRVYNTVNG  
KQKKCYKGSQGD EGSLKVVHVDPSGTFLATSCSDKSI SVIDFYSGECIAKMFHSEIITS  
MKFTYDCHHLITVSGDSCVFIWHLGPEITNCMKQHLL EIDHRQQQHTNDKKRSGHPRQD  
TYVSTPSEIHSLS PGEQTEDDLEEECEPEEMLKTPSKDSLDPDPRCLLTNGKLP LWAKRL  
LGDDD VADGSAFSAFHAKRSYQPHGRWAERAGQEPLKTI LDAQDLDCYFTPMKPESLENSILD  
SLEPQSLASLLSESESPQEAGRGHPSFLPQQKESSEASELILYSLEAEVTVTGTDSQYCR  
KEVEAGPGDQQGDSYLRVSSDSPKDQSPPEDSGESEADLECSFAAIHSPAPPPDPAPRFA  
TSLPHFPGCAGPTEDEL SLPEGPSVPSSSLPQTPEQEKFLRHHFETLTESPCRELFPAAL  
GDVEASEAEDYFFNRLSISTQFLSSLQKASRFTHTFPPRATQCLVKSPPEVKLMDRGGSQ  
PRAGTGYASPDSTHVLAAGKAEETLEAWHPPPPCLTSLASCVPASSVLP TDRNLPTPTSA  
PTPGLAQGVHAPSTCSYMEATASSRARI SRSISLGDSEGP IVATLAQPLRRPSSV GELAS

LGQELQAITTATPPSLDSEGQEPALRSWGNHEARANLRLTLSSVCDGLLLLPPVDTQPGVT  
VPAVSFPAPSPVEESALRLHGSAFHPSLPAPESPGLPAHPSNPQLPEAGPGVPGGTASLL  
EPTSGALGLFQGSPARWSEPWPVEALSPSPLELSRVGNILHRLQTTTFQEALDLYRVLVS  
SGQVDTGQQQARTELVSTFLWIHSQLEAECLVGTSVAPAQALPSGPPTPPTLYPLASPD  
LQALLEHYSELLVQAVRRKARGH

>Pan troglodytes\_WDR62

MAAVGSGGYARNNDAGEKLPVSMAGVPARRGQSSPPPAPPICLRRRTRLSTASEETVQNRV  
SLEKVLGITAQNSSGLTCDPSTGHVAYLAGCVVILDPKENKQQHIFNTARKSLSALAFS  
PDGKYIVTGENGHRPAVRIWDVEEKNQVAEMLGHKYGVACVAFSPNMKHIVSMGYQHDMV  
LNVVDWKKDIVVASNKVSCRVIALSFSSESSYFVTVGNRHVRFWFLEVSTETKVTSTVPL  
VGRSGILGELHNNIFCGVACGRGRMAGSTFCVSYSGLLCQFNEKRVLEKWINLKVLSLSSC  
LCVSEQELIFCGCTDGIIVRIFQAHSLSHYLANLPKPHYLGVDAQGLEPSFLFHRKAEAVYP  
DTVALTFDPIHQWLSVYKDHSIYIWDVKDINGVGKVVSELFHSSYVWVVEVYPEFEDQR  
ACLPSGSFLTCCSSDNTIRFWNLDSPPDSHWQKNIFSNLTKVYVENDIQHLQDMSHFDP  
RGENGTMPMDVKAGVRVMQVSPDGQHLASGDRSGNLRRIHELHFMDLVKVEAHDAEVLCL  
EYSKPETGLTLLASASRDRLIHVLNVEKNYNLEQTLDDHSSSITAIKFAGNRDIQMISCG  
ADKSIYFRSAQQGSDGLHFVVRTHHVAEKTTLTDMDIDITQKYVAVACQDRNVRVYNTVNG  
KQKKCYKGSQGDGSLKLVHVDPSGTFLATSCSDKSI SVIDFYSGECIAKMFHSEIITS  
MKFTYDCHHLITVSGDSCVFIWHLGPEITNCMKQHLLLEIDHRQQQHTNDKKRSGHPRQD  
TYVSTPSEIRSLSPGEQTEDDLEEECEPEEMLKTPSKDSLDPDRCLLTNGKLPWAKRL  
LGDDDVADGSAFHAKRSYQPHGRWAERAGQEPLKTIILDAQDLDCYFTPMKPELENSILD  
SLEPQSLASLLSESESPQEAGRGHPSFLPQQKESSEASELILYSLEAEVTVTGTDSQYCR  
KEVEAGPGDQQGDSYLRVSSDSPKDQSPPEDSGESEADLECSFAAIHSPAPPPDPAPRFA  
TSLPHFPGCAGPTEDELSPPEGSPVSSSLPQTPEQEKFLRHHFETLTESPCRELFPAAL  
GDVEASEAEDYFFNPRLSISTQFLSSLQKASRFTHTFPPRATQCLVKSPKVEKLMDRGGSQ  
PRAGTGYASPDTRTHVLAAGKAEETLEAWHPPPPCLTSLASCVPASSVLPTDRNLPTPTSA  
PTPGLAQGVHAPSTCSYMEATASSRARISRSISLGDSEGPVATLAQPLRRPSSVGLAS  
LGQELQAITTATPPSLDSEGQEPALRSWGNHEARANLRLTLSSVCDGLLLLPPVDTQPGVT  
VPAVSFPAPSPVEESTLRLHGSAFHPSLPAPESPGLPAHPSNPQLPEAGPGVPGGTASLL  
EPTSGALGLFQGSPARWSEPWPVEALSPSPLELSRVGNILHRLQTTTFQEALDLYRVLVS  
SGQVDTGQQQAQTELVSTFLWIHSQLEAECLVGTSVAPAQALPSGPPTPPTLYPLASPD  
LQALLEHYSELLVQAVRRKARGH

>Gorilla gorilla\_WDR62

MAAVGSGGYARNNDAGEKLPVSMAGVPARRGQSSPPPAPPICLRRRTRLSTASEETVQNRV  
SLEKVLGITAQNSSGLTCDPGAGHVAYLAGCVVILDPKENKQQHIFNTARKSLSALAFS  
PDGKYIVTGENGHRPAVRIWDVEEKNQVAEMLGHKYGVACVAFSPNMKHIVSMGYQHDMV  
LNVVDWKKDIVVASNKVSCRVIALSFSSESSYFVTVGNRHVRFWFLEVSTETKVTSTVPL  
VGRSGILGELHNNIFCGVACGRGRMAGSTFCVSYSGLLCQFNEKRVLEKWINLKVLSLSSC  
LCVSEQELIFCGCTDGIIVRIFQAHSLSHYLANLPKPHYLGVDAQGLEPSFLFHRKAEAVYP  
DTVALTFDPIHQWLSVYKDHSIYIWDVKDINKVGKVVSELFHSSYVWVVEVYPEFEDQR  
ACLPSGSFLTCCSSDNTIRFWNLDSPPDSHWQKNIFSNLTKVYVENDIQHLQDMSHFDP  
RGENGTMPMDVKAGVRVMQVSPDGQHLASGDRSGNLRRIHELHFMDLVKVEAHDAEVLCL  
EYSKPETGLTLLASASRDRLIHVLNVEKNYNLEQTLDDHSSSITAIKFAGNRDIQMISCG  
ADKSIYFRSAQQGSDGLHFVVRTHHVAEKTTLTDMDIDITQKYVAVACQDRNVRVYNTVNG  
KQKKCYKGSQGDGSLKLVHVDPSGTFLATSCSDKSI SVIDFYSGECIAKMFHSEIITS  
MKFTYDCHHLITVSGDSCVFIWHLGPEITNCMKQHLLLEIDHRQQQHTKDKKRSKHPRQD  
TYVSTPSEIRSLSPGEQTEDDLEEECEPEEMLKTPSKDSLDPDRCLLTNGKLPWAKRL  
LGDDDVADGSAFHAKRSYQPHGRWAERAGQEPLKTIILDAQDLDCYFTPMKPELENSILD  
SLEPQSLASLLSESESPQEAGRGHPSFLPQQKESSEASELILYSLEAEVTVTGTDSQYCR  
KEVEAGPGDQQGDSYLRVSSDSPKDQSPPEDSGESEADLECSFAAIHSPAPPPDPAPRFA  
TSLPHFPGCAGPTEDELSPPEGSPVSSSLPQTPEQEKFLRHHFETLTESPCRELFPAAL  
GDTEASEAEDYFFNPRLSISTQFLSSLQKASRFTHTFPPRATQCLVKSPKVEKLMDRGGSQ  
PRAGTGYASQDRTHVLAAGKAEETLEAWRLPPPCLTSLVSCVPASSVLSTDRKLPPTPTSA  
PTPGLAQGVHAPSTCSYMEATASSRARISRSISLGDSEGPVATLAQPLRRPSSVGLAS



LGQELQAITTATTPSLDSEGQEPALRSWGNHEARANLRLTLSSVCDGLLLPPVDAQPGVT  
VPAVSFPAPSPVEESALRLHGSAFRPSLPAPESPGLPAHPSNPQLPEAGPGVPGGTASLL  
EPTSGALGLFQGSPARWSEPWPVEALPPSPLELSRVGNILHRLQTTTFQEALDLYRVLVS  
SGQVDTGQQQARTELVSTFLWIHSQLEAECLVGTSVAPAQALPSPGPPSPPTLYPLASPD  
LQALLEHYSELLVQAVRRKARGH

>Macaca mulatta\_WDR62

MAAVGSGGCARNNDAGEKLPVSMAGVPARRGQSSPPPAPPLCLRRRTRLSTASEETVQNRV  
SLEKVLGITAQNSSGLTCDPGTGHVAYLAGCVVILDPKENKQQHIFNTARKSLSALAFS  
PDGKYIVTGENGHRPAVRIWDVEEKNQVAEMLGHKYGVACVAFSPNMKHIIVSMGYQHDMV  
LNVWDWKKDIVVASNKVSCRVIASFSEDSYFVTVGNRHVRFWFLEVSTETKVTSTVPL  
VGRSILGELHNNIFCGVACGRGRMAGSTFCVSYSGLLCQFNEKRVLEKWINLKVSLSSC  
LCVSQLIFCGCTDGIIVRIFQAHS�HYLANLPKPHYLGVDVAQGLEPSFLFHRKAEAVYP  
DTVALTFDPIHQWLSVYKDHISIYIWDVKDINRVGKVVSELFHSSYVWVVEVYPEFEDQR  
ACLPSGSFLTCSNDNTIRFWNLDSPPDSHWQKNIFSNLTKVYVENDIQHLQDMSHFDP  
RGENGTTPMDVKAGVRVMQVSPDGQHLASGDRSGNLRRIHELHFMDLVKVEAHDAEVLCL  
EYKSKPETGLTLLASASRDRLIHVLNVEKNYNLEQTLDDHSSSITAIKFAGNRDIQMISCG  
ADKSIYFRSAQQGSGLHFVVRTHHVAEKTTLYDMDIDITQKYVAVACQDRNVRVYNTVNG  
KQKKCYKGSQDEGSLKVVHVDPSGTFLATSCSDKISVIDFYSGECIAKMFHSEIITS  
MKFTYDCHHLITVSGDSCVFIWHLGPEITNCMKQHLLLEIDHQEQQHTKDRKQNSHPRQD  
TYVSTPSEIRSLSPGEQTEDDLEEECEPEEMLKTPSKDSLDPDRCLLTNGKLPWAKRL  
LGDDDVADGSFAHAKRSYQPHGRWAERAGQEPLKTIILDAQDLDCYFTPMKPESLENSILD  
SLEPQSLASLLSESESPQEAGRGHPSFLPQQRESSEASELILYSLEAEVTVTGTDSQYCG  
KEAEARPGDQQGDSYLRVSSNSPKDQSPPEDSGESEADLECSFAAVHSPAPPPDPAPRFA  
TLLPHFPGCAGPTEDELSLPEGPSVPSSSLPQTPEQEKFLRHHFETLTESPCRELFPAAL  
GDVEASEAEYFFNPRLSISTQFLSSLQKASRFTHTLPPRATQHLVKSPEVKPMDQVGSQ  
PRADTGYASPDGTHVLAAGKAEETLEAWRPPPPCLTSLASCVPASSVLPTDRKLPPTPTSV  
STPGLAQAVHTPSTCSYMEATASSHARI SRSISVGDSEGP IVATLAQPLRRPSSVGEAS  
LGQELQAITAAATPNLGSQEPALHSWGNHEARANLRLTLSSVCDGLLLPPVDAQPGVT  
IPAVSFPAPSPVDETLRLHGSAFRPGLPAPESPGLPAHPSNPQLPEAGPGIPGGTASLL  
EPTSGALGLFQGSPARWSEPWPVPAEALPPSPLELNRVGNILHRLQTTTFQEALDLYRVLIS  
SGQVDTRQQQARTELVSTFLWIHSQLEAECLVGTSVAPAQTLPSGPPSPPTLCPLASPD  
LQALLEHYSELLVQAVRRKARGH

>Saimiri boliviensis boliviensis\_WDR62

MAAVGSGGYARNNDAGEKLTSMAGVPARRGQSSPPPAPPLCLRRRTRFSTAPEETVQNRV  
SLEKVLGITAQNSSGLTCDPGTGHVAYLAGCVVILDPKENKQQHIFNTARKSLSALAFS  
PDGKYIVTGENGHRPAVRIWDVEEKNQVAEMLGHKYGVACVAFSPNMKHIIVSMGYQHDMV  
LNVWDWKKDIVVASNKVSCRVIASFSEDSYFVTVGNRHVRFWFLEVSTETKVTGTVPL  
VGRSILGELHNNIFCGVACGRGRMAGSTFCVSYSGLLCQFNEKRVLEKWINLKVSLSSC  
LCVSQLIFCGCTDGIIVRIFQAHS�HYLANLPKPHYLGVDVAQGLEPSFLFHRKAEAVYP  
DTVALTFDPIHQWLSVYKDHISIYIWDIKDINRVGKVVSELFHSSYVWVVEVYPEFEDQR  
ACLPSGSFLTCSNDNTIRFWNLDSPPDSHWQKNIFSNLTKVYVENDIQHLQDMSHFDP  
RGENGTTPMDVKAGVRVMQVSPDGQHLASGDRSGNLRRIHELHFMDLVKVEAHDAEVLCL  
EYKSKPETGMTLLASASRDRLIHVLNVEKNYNLEQTLDDHSSSITAIKFAGNRDIQMISCG  
ADKSIYFRSAQSGDGLHFVVRTHHVAEKTTLYDMDIDITQKYVAVACQDRNVRVYNTVNG  
KQKKCYKGSQDEGSLKVVHVDPSGTFLATSCSDKISVIDFYSGECIAKMFHSEIITS  
MKFTYDCHHLITVSGDSCVFIWHLGPEITNCMKQHLLLEIDRREQQHTKDRKWSGHPRQD  
TYVSTPSEIRSLSPGEQTEDDLEEECEPEEMLKTPSKDSMNPDRCLLTNGKLPWAKRL  
LGDDVDPDGSFAHAKRSYQPHGRWAERAGQEPLKTIILDAQDLDCYFTPMKPENLENSVLD  
SLEPQSLAGLLSESESPQEAGHGHSFLPQQRESSNEASELILYSLEAEVTVTGTDSQYC  
GKEAEVGPQDQQGDSYLRVSSISPDKQSPPEDSGESEADLECSFEAVHSPVPPPHPTPQF  
VTLLPHFPGCTGPTTEDELSLPEGPSIPSSSLPQTPEQEKFLRHHFETLTESPCRELFPTA  
LGDTEASETEDYFFNPRLSISTQFLSSLQKASRFTHTFSPRATQHLVKSPEVKPTDRGGS  
QPRAGTGYTSQDGHVLTAGKAQETLEAWRPPPPCLTGLVPCVPASSVLPTDGKLPPTPTS  
ALTGLPAQGVHAPSTCSYMEAPANSRARI SRSISLGDSKGP IVAELARPLCRPSSVGDLA  
SLGQELQITITTTVTPNLDSEGQEPALHSWGNHEARANLRLTLSSVCDGLLLPTVDAQPGV

TVPEASFSAPNPIDGSALRLHGS AFLPLSPVSESPGIPAH PSSPQLPEAGPGVPGATASL  
LEPTSGALGLIEGSPACWSEPWVPAEALSPSPLELSRVGNILHRLQTAFQEALDLYRVLV  
SSGQVDTRQQARNELVSTFLWIHSQLEANCLVGT SVAPAQALPSPGPPSPPTLYPLASP  
DLQALLEHYSELLVQAVRRKARGH

>Mus musculus\_WDR62

MMAALAAGGYTRSDTIEKLS SVMAGVPARRNQSSPPPAPPLCLRRRTR LAAAPEDTVQNR  
VTLEKVLGITAQNSSGLTCDPGTGHVAYLAGCVVVV LNPKENKQQHIFNTTRKSL SALAF  
SPDGKYIVTGENGHRPAVRIWDVEEKTQVAEMLGHKYGVACVAFSPNMKHIVSMGYQHDM  
VLNVWDWKKDIVVASNKVSCRVI ALSFSEDSSYFVTVGNRHVRFWFLEASTEAKVTSTVP  
LVGRSGILGELHNNIFCGVACGRGRMAGNTFCVSYSGLLCQFNEKRVLDKWINLKVSLSS  
CLCVSDELIFCGCTDGI VRI FQAHSLLYL TNLPKPHYLGVDVAHGLDSSFLFHRKAEAVY  
PDTVALTFDIPVHQWLS CVYKDHSIYIWDVKD IDEVSKIWSELFHSSFVWNVEVYPEFEDQ  
RACLPSGTFLTCS SNTIRFWNLDSASDTRWQKNIFSDSLLKV VYVENDIQHLQDL SHFP  
DRGSENGT PDMKAGVRVMQVSPDGQHLASGDRSGNLR IHELHFMD ELIKVEAHDAEVL C  
LEYSKPETGVTLLASASRDRLIHVLNVEKNYNLEQTLDDHSSSITAIKFAGTRDVQMISC  
GADKSIYFRSAQQASDGLHFVRTHHVAEKT TLYDMDIDITQKYVAVACQDRNVRVYNTVS  
GKQKCKYKGSQGD EGSLLKVHVDPSGTFLATSCSDKSI SLIDFYSGECVAKMFGHSEIVT  
GMKFTYDCRHLITVSGDSCVFIWHLGPEITTCMKQHLL EINHQEQQQPKDQKWSGPPSQ  
ETYASTPSEIRSLSPGEQTEDEMEEECEPEELLKTPSKDSLDPDPRCLLTNGKLP LWAKR  
LLGDDDVDASSAFHAKRSYQPHGRWAERAEQEPLKTI LDAWSLDSYFTPMK PENLQDSVL  
DSVEPQNLAGLLSECSLNGHTSPG EGLVSYLLHPELGS PKEDNRGHPSYLP LQREATEA  
SELILCSPEAEVSLTGMHREYEEETEAGPEDQQGDTYLRVSSVSSKDQSPPEDSGESEA  
ELECSFAAAHSSAPQTDPGPHLTMTAGKPEY PSTEELS QPELPGLGNGSLPQTPEQEKFL  
RHHFETLTDAPTEELFHGSLGDIK ISETEDYFFNPRLSI STQFLSRLQKTSRCPRLPLH  
LMKSPEAQVPGQGGNQP KAGPLRAGTGYMSSDGTNVL SGQKAEETQEALSL LDRKPPTPT  
SVLTTGREQSI SAPSSCSYLESTTSSHAKTTRSISLGDSEGPVTAELPQSLHKPLSPGQE  
LQAIPTTVALTSSIKDHEPAPLSWGNHEARASLKLTLSSVCEQLLSPPPQEPPI THVWSQ  
EPVDVPPSMAVTVASF CAPSPVDMSTLGLHSSMFLPKTSASGPLTPPAHLQLLETRSRVP  
GSTAALLEPTPDASGFIADSPGHWDTEVPTPELLGSVSVLHRLQTAFQEALDLYRMLVS  
SSQLGPEQQQAQTELASTFHWILNQLEASNCMAAANLAPPQTLPSDPDPLSLPTLCPLASP  
NLQALLEHYSELLVQAVRRKARGD

>Rattus norvegicus\_WDR62

MMAALAAGGYARS DTIEKLS SVMAGVPARRNQSSPPPAPPLCLRRRTR LAAAPEDTVQNR  
VTLEKVLGITAQNSSGLTCDPGTGHVAYLAGCVVVV LNPKENKQQHIFNTTRKSL SALAF  
SPDGKYIVTGENGHRPAVRIWDVEEKTQVAEMLGHKYGVACVAFSPNMKHIVSMGYQHDM  
VLNVWDWKKDIVVASNKVSCRVI ALSFSEDSSYFVTVGNRHVRFWFLEASTEAKVTSTMP  
LVGRSGILGELHNNIFCGVACGRGRMAGNTFCVSYSGLLCQFNEKRVLDKWINLKVSLSS  
CLCVSDELIFCGCTDGI VRI FQAHSLLYL TNLPKPHYLGIDVAQGLDSSFLFHRKAEAVY  
PDTVALTFDIPHQWLS CVYKDHSVYIWDVKD INEVSKIWSELFHSSFVWNVEVYPEFEDQ  
RACLPSGTFLTCS SNTIRFWNMDSGSDTQWRKNIFSDSLLKV VYVENDIQHLQDMSHFP  
DRGSENGT PDMKAGVRVMQVSPDGQHLASGDRSGNLR IHELHFMD ELIKVEAHDAEVL C  
LEYSKPETGVTLLASASRDRLIHVLNVEKNYNLEQTLDDHSSSITAIKFAGTRDVQMISC  
GADKSIYFRSAQQTS DGLHFVRTHHVAEKT TLYDMDIDITQKYVAVACQDRNVRVYNTVS  
GKQKCKYKGSQGD EGSLLKVHVDPSGTFLATSCSDKSI SVIDFYSGECVAKMFGHSEIVT  
GMKFTYDCRHLITVSGDSCVFIWHLGPEITTCMKQHLM EINHQEQQHLPKDQKWSGPPSQ  
ETSASTPSEIRSLSPGEQTEDEMEEECEPEETLKTPSKESLDPDPRCLLTNGKLP LWAKR  
LLGDDVDVTDSSAFHAKRSYQPHGRWAERAEQEPLKTI LDAWALDSYFTPMK PGNLEDSVL  
DSVEPQNLAGLLSECS PENHTAPG EGLVSYLCHSESGSPKEDSRGHPSYLP LQREGTET  
RELILCSPEVEVTVTGMHREYEEAEAGPEDQQGDSYLRVSSVSSKDQSPPEDSGESEA  
LECSFAAAHV SAPRTDPGPHLTMTGKPEHSSTDELAQPGVPGLGNGSLPQTPEQEKFLRH  
HFETLTDAPAEELFP GSLGDIK ISETDDYFFNPRLSI STQFLSRLQKTSRFPRLPLHLM  
KSPEVQVPGQGGNQP KAGPLRAGTGYMSSDGTNVL SGQMAEETPEASCLPTPPITGLASC  
VPPSSVIPTDRKPPTPTSGLTTGREQSI PAPSPCSYLESTTSSHAKMTRSTSLGDSEGPV  
TGELPRPLHKPVSPGQEPQAVPTTVALTSSVKGHEPALPAWGNHEARASLRLTLSSVCEQ  
LLSPPQLEPPTTPVWSQEAVDVPPSMAVTVASF SAPSPEDMSTLGLHSSVFLPKTSASGP

LTPPAHPNSLQLETRSRMPGSTPALLEPTPDASSGSPDSPGHCGEPGRRAEVPPPGLLE  
LDSVESVLYRLQTAFOEALDLYRMLASSNQLGAEQQQAQTELASAFHWIHHQLEASNCVG  
AASVAPPLTLPSGPPSPPTLCPLASPNLQALLEHYSELLVQAVRRKVRGD

>Equus caballus\_WDR62

MAAIGPGGFARNDAVEKLPVSMAGVSARRSQSSPPPAPPVCLRRRTRPLAAPEDTMQNRV  
SLEKVLGITAQNSNGLTCDPGTGHVAYLAGCVVILNPKENKQQHIFNTARKSLALAFS  
PDGKYIVTGENGHRPAVRIWDVDEKSQVAEMLGHKYGVACVAFSPNMKHIVSMGYQHDMV  
LNVVDWKKGILVASNKVSCRVIALLSFSEDSSYFVTVGNRHVRVFWFLEVSTEAKVTGTVP  
VGRSGILGELHNNVFCGVACGRGRMAGNAFCVSYSGLLCQFNEKRVLEKWINLKVSLSSC  
LCVQSQELIFCGCTDGIVRIFQAHSLHYLANLKPBYLGVQVVAQGLEPSFLFHRKAEAVYP  
DTVALTFDPIHQWLSVCYKDHISIYIWDVKDINKVGKMWSELFHSSYVWVVEVYPEFEDQR  
ACLPSGSFLTCSNDNTIRFWNMDSPPDSHWQKNIFSNLTKVYVENDIQHLQDMSHFDP  
RGENGTPLDVKAGVRVMQVSPDGQHLASGDRSGNLRQLHFMDELVKVEAHDAEVLCLLEY  
SKPETGLTLLASASRDRLIHVLNVEKNYNLEQTLDDHSSSITAIKFAGTRDIQMISCGAD  
KSIYFRSAQQASDGLHFVVRTHHVAEKTTLYDMDIDITQKYVAVACQDRNVRVYNTVNGKQ  
KKCYKGSQDEGSLLKVHVDPSTGFLATSCSDKISVIDFYSGECIAKMFHSEIVTSMK  
FTYDCRHLITVSGDSCVFIWHLGPELTNCMKQHLLLEIDRREQRQETKDGWSSQPRQET  
YVSMPSSETCSLSPGEQTEDELEDECEPEELLKTPSKESLDPDPQCLLTNGKLPWAKRLV  
NDDVDVDSAFHARRSYQPHGRWAERADQEPKTIILDARDLDCYFTPMKPESELEDSLLDT  
VEPQSPAGLLSEPESPRDDGCGHPSFLPLQRESSEASELIIYSPEAEVTVTGTDSSECAK  
EGMREPGDQOGDCYLQVPSIGLKHQSPPEDSGESEANLECSFATIHSSPPQDPDPDFDP  
LAFPSRPGCPGTAEELSQPEVPSISNGSLPQTPEQEKFLRHHFETLTDAPPEELFHGSLR  
DVQASEAEDYFNPRLSISAQFLSRLQNTSRFSHTCPPQLPLHLGKPPVVKRSDFRGSQPR  
AEPFRVDAGCTSPGRTSVLSVGMMAEPELEAWCPLTPCLTGLPPCVSSSVLPTDGKP  
LTPPTALPTPGLAQEVCTPSTRSYLQTTASSRAKMSRSISVEDRESPVLAELPRPLRRPSS  
MGELASLGQDLQAVSTAAPSSDSEAQEPALPSWGNHEARASLKLTLNIDGLLLPPL  
EPPTTCVWSQEPVATQPDVMAATASFLAHSMPDGTSLRLHNSAFLPRLPAPEPLNTPAHP  
NKPPLPEASPGAPGSIITSLLEPTPGEYHPQDKGFDHCGSPRRWGEPEGMPAPLELSSVETI  
VHRLQTTFOEALDLYLHVSSDQVSAEQRQARTELASTFHWIHCQLEANDWLLGTDVAPD  
QALPSGPPSPPTLCPLASPDHLALLEHYSELLVQAVRRKARGD

>Myotis dividendii\_WDR62

MAALGPGGYARNDVRRGQSSPPSPALCLRRRTRLPAPEDTVQNRVSLEKVLGITAQNS  
SGLTCDPSTGRVAYLAGCVVILDPKENKQQHIFNTARKSLSSALAFSPDGKYIVTGENGH  
RPTVRIWDVDEKSQVAEMLGHKYGVACVFSFSPNMKHIVSMGYQHDMVNLNVVDWKKDIVVA  
SNKVSCRVIALLSFSEDSSYFVTVGNRHVRVFWFLEVSTEAKVTGTVPLIGRSGILGELHNN  
VFCGVACGRGQMAGNTFCVSYSGLLCQFNEKRVLEKWINLKVSLSSCLCVSQELIFCGCT  
DGIVRIFQAHNLHYLANLKPBYLGVQVVAQGLEPSFLFCRKAEEAVYPDTVALTFDPIHQW  
LSCVYKDHISIYIWDVKDINKVGKMWSELFHSSYVWVVEHSTLSSSQKTEKYRCERNTSIG  
LPPARALTRALAGEEPATNVYPEFEDQRACLPTGSFLTCSNDNTIRFWNINSSPDPWQK  
NIFSNLTKVYVENDIQHLQDMSHFDPDRGENGTPLDVKAGVRVMQVSPDGQHLASGDR  
SGNLRQVGPCCPLYTFQFRLRIHELHFMDELVKMEAHDAEVLCLLEYSKPETGLTLLASA  
SRDRLIHVLNVEKNYNLEQTLDDHSSSITAIKFAGNRDIQMISCGADKSIYFRSAQQGSD  
GLHFVVRTHHVAEKTTLYDMDIDITQKYVAVACQDRNVRVYNTMNGKQKKCYKGSHGDEGS  
LLKAKARTFSEPLDGVHVDPSTGFLATSCSDKISVIDFYSGECIAKMFHSEIVTGMKF  
TYDCRHLITVSGDSCVFIWHLGPEITNCMKQHLLLEIDHLEQQQQQQQNTKDGKWSHPR  
QETYASVPNKICSLRSGEQAEDELEEECEPEELLKTPSKESLSDPQCLLTNGKLPWAK  
RLLDGDDMVDGSAFYTKHSYQPHGRWAERADQEPKTIILDVRDLDCYFTPLKSDSLEDSV  
LDIVKQSLAGLLSEKECSEAREVSSLEVEVTVPGTDSKYSSEEVEREPGDQOGDSYLR  
VSSMGLKDRSKLADSGNSEAYLECTFTTIHSSPQLDSDPRFDVTVTPIIPACPGTAEELS  
RPELAGISNDSLPTPEQERFLRHHFETLTDTHHEELFHRSLRDVTASADEDFNPRLSI  
SAQFLSRLQKTSRLNHTFSPPLHLHLVKSPEVKLIDLQGNQARAEPGTGYTFPGRTDVLS  
GRKAKESLDNLEAWCPLTLPTRKPLAPTNPGLHIPSTCSYIEATASSCAKMSPSIS  
LEDSQVPLVDKERGRPLCRPSSLGKLASMDQELQAITTTAATSSDSEGREPALPSQGN  
EAQASFKQTLGVCDRLLLPSPQEPPTTCVWSQEPVATQSDVTVTTSTFPASSPVDMS  
LRLHSSTFLPRLLAEPNTPAHPNSPPLPEAMPGSIITSLLELTPDALSVLRDPSGHWGE

PGVPARVLS P P A P L E V S S V G T I V H K L Q T A F Q E A L D L Y H L M I S S D Q L S T K Q R Q A R T E L A S T F  
L W I H S Q L E T N D W L V E S D V A P A Q A L P S P N P P S P P T L C P L A S P D L R A L L E H Y S E L L V Q A V R R  
K A Q G D

>Loxdonta africana\_WDR62

MAALGPGGYARND AVEKLS SVTAGVPARRGQPSPPPAPPLCLRRRRLTAAPEDTVQSRV  
SLEKVLGITAQNSSGLTCDPSTGHVAYLAGCVVILDPKENKQQHIFNTARKSL SALAFS  
PDGKYIVTGENGHRPAVRIWVDVDEKSQVAEMLGHKYGVACVAFSPNMKHIVSMGYQHDMV  
LNVWDWKKDIVVASNKVSCRVIALSFSSEDSSYFVTVGNRHVRFWFLEVSTEAKVTGTVPPL  
VGRSGILGELHNNVFCGVACGRGRMAGNTFCVSYSGLLCQFNEKRVLEKWINLKVSLSSC  
LCVSQELIFCGCTDGVVRI FQAHS LHYLTNL PKPHYL GVDVAQGLEPSFLFRKAEAIYP  
DTVALTFDPTHQWLS CVYKDHSIYIWDVQDINKVSKIWSELFHSSYVWNVEVYPEFEDQR  
ACLP S G S F L T C S S D N T I R F W N T D S S P D S H W Q K N I F S N T L L K V V Y V E N D T Q H L Q D T S H F P D  
R G S E N G T P M D V K A G V R V M Q V S P D G Q H L A S G D R S G N L R I H E L H F M D E L L K V E A H D A E V L C L  
E Y S K P E T G L T L L A S A S R D R L I H V L N V E K N Y N L E Q T L D D H S S I T A I K F A G N R D I Q M I S C G  
A D K S I Y F R S A Q R A S D G L H F V R T H H V A E K T T L Y D M D I D I T Q K Y V A V A C Q D R N V R V Y N T V N G  
K Q K K C Y K G S Q G D E G S L L K V H V D P S G T F L A T S C S D K S I S V M D F Y S G E C V A K M F G H S E I V T G  
M K F T Y D C R H L I T V S G D S C V F I W H L G P E I T S C M K Q H L L E I D H R E G W E L E Q P A Q V W W P P D Q P  
P S E Q E A C A M P S E A R S I S P G E Q T E D E L E E C E P E E M L K T P S K E S L D P D P R C L L T N G K L P L  
W A K R L L G D D D V A D G S A F H A K R S Y Q P H G R W A E R A D Q E P L K T I L D A R D L D C Y F T P M K P E S L E  
D S V L D T V E P Q S L V D L L S E G S D G D P V L R P G P G P L E V L L H M F S E C P Q E N S C G H P S F L P L Q R G  
S E A S E L V T Y S L E A A V T V S G T D S K Y R V G E E D G G R A D Q Q D D S Y L R I S S T G S K A Q S P P E D S G E  
S E A D L E C S F A T I H S S P P R P D P D P R F D A T V S H T P G C P G P A E E E Q A L P E G P G L T S S S L P Q T P  
E Q E K F L R H H F E T L A D T Q P E E L F H R S L R D V T A S E A E D F F L N P R L S I S A Q F L S R L R K K P R F T  
H T F P P Q L P L H L M K S S E V N P M D Q G G S Q P R A E L R A G T G Y A S P D Q T N V L S G G E A D E L L E T V E A  
W H P L N R R P P L P A S I P T P G L A Q G V R V P S T C S Y M E A T A S S R A K M S H S T S L R D R V G P V P A E L A  
R P L C R P S S M G E L A S L G Q E L Q A V T T T V A P S S G S E G R E P A L A S R G N H E A R A N L R L T L S S I C D  
S F L L P P S P L E A P T T R A W S Q E P V A T Q P C A T V T A A R L L A P S P V N T S A L R L P D P S F L P R L P A P  
Q P L N P S T H P G S S Q L P E T K P G I S G S T A F L L E P T A D A P S L V Q S N P G H W E E P G L P A G V L P P A P  
L E L S G V E T I V H R L Q T A F Q E A L D L Y L V L V S S G Q V S A E Q Q Q T R T E L A S T F L W I H S Q L E A H W L  
G G T E M A P A Q A L P S P G P P S P P T L C P L A S P D L R A L L E H Y S E L L V Q A V R R K V E G D

>Orcinus orca\_WDR62

MAALGPGGYARND AVEKLS I M A G V P A R R A Q S S P P P V L P L C L R R R R L S A A P E D T V Q N R V  
SLEKVLGITAQNSNGLTCDPSTGHVAYLAGCVVILNPKENKQQHIFNTARKSL SALAFS  
PDGKYIVTGENGHRPAVRIWVDVEEKSQVAEMLGHKYGVACVAFSPSMKHIVSMGYQHDMV  
LNVWDWKKDIVVASNKVSCRVIALSFSSEDSSYFVTVGNRHVRFWFLEVSTEAKVTSTVPPL  
VGRSGILGELHNNVFCGVACGRGQMTGSTFCVSYSGLLCQFNEKRVLEKWINLKVSLSSC  
LCVSQELIFCGCTDGI V R I F Q A H S L Q Y L A N L P K P H Y L G V D V A Q G L E P S F L F S R K A E A I Y P  
DTVALIFDPIHQWLS CVYKDHSIYIWDVKDINKVGKVVSELFHSSYVWNVEVYPEFEDQR  
ACLP S G S F L T C S S D N T I R F W N M D G S P D S H W Q K N I F S N T L L K V V Y V E N D I Q H L Q N M S H F P D  
R G S E N G M P V D M K A G V R V M Q V S P D G Q H L A S G D R S G N L R I H E L H F M D E L V K V E A H D A E V L C L  
E Y S K P E T G L S L L A S A S R D R L I H V L N V E K N Y N L E Q T L D D H S S I T A I K F A G H K D I Q M I S C G  
A D K S I Y F R S A Q Q G S D G L H F V R T H H V A E K T T L Y D M D I D I T Q K Y V A V A C Q D R N V R V Y N T M N G  
K Q K K C Y K G S Q G D E G S L L K V H V D P S G T F L A T S C S D K S I S V I D F Y S G E C V A K M F G H S E I V T G  
M K F T Y D C R H L I T V S G D S C V F I W H L G P E I T S C M K Q H L L E I D H R E Q Q Q E N T K G R N W S S H P R Q  
E T Y A M P N E I C S L S P G E Q T E D K L E E C E P E E L L K T P S K E S L D P D P R C L L T N G K L P L W A K R  
L L G D D D V A D S A F H A K R S Y Q P H G R W A E R A D Q E P L K T I L D A R D L D C Y F T P M K P E S L E D S V L  
D T V E P Q R L A G L L S E S E S P Q D N G C G P P S L P P L Q R E S S E A S E L I I Y P L E T E V T V T G T D S K Y C  
A E E V E R A P G D Q Q G D S Y L R A P S I D S K D Q R P P E D S G E S E A D L E C S F T T I H S S P P Q P D P D P Q F  
D V T P P T P G C P G T T E E L S Q P E V P S I S N G S L P Q T P E Q E K F L R H H F E T L T D A H P E E P F H G S L R  
D L K A S E A E D N F F N P R L S I S G Q F L S R L Q K T S R F T H T F P S R L P L H L V K S P E V K L M D L R G S P P  
R A E P L R A G T G Y T C P G R T N V I S G G K A E E P L E T L E A W S P L T P C L T G L A P C I L P S S V L P T D K K  
P P T P T A L P T P G L A Q G F H T P A A R S C M E A T A S S C A R I P H S I S I E D S E G P V L A E L A R P L C R S S  
S L G E L A S L G Q E L Q V I T T T V T P S S D S E G Q E A A L P S R G N H E A R A S L K L T L P S I C D R L V L P P P  
Q L E P P T T C V W S Q E P V A I Q P N V M V T T A S F L A P S P V D G S A P R L H N A T F L P R F L A T E A L N T P S  
H P N S P P L P E A R P G V P G S I T S L L E P T P D A L S P V Q G C P G H C G E P R G P A R V L P P D P L E L S N V G  
T V V H R L Q T T F Q E A L D L Y H L M V S S D E V G A E Q Q Q A R T E L A S T F L W I H S Q L E A N D W L V G T D V A

PAQALPNPGPPSPPTLCLPLASPDRLRALLEHYSELLVQAVRRKARGD

>Sarcophilus hairisii\_WDR62

QVTLEKVLGITAQNSSGLTCDPNTGHIAYLAGCVVILDPKSKQQHIFNTARKALSALS  
FSPDGRYIVTGENGHRPAVRIWDVEEKSQVAEMLGHKYGVACVAFSPNMKHIVSMGYQHD  
MNVNVWDWKKDSVVASNKVSCKVIAISFSEDSSYFVTVGHRHVKFWFLEMSKEVKVTGTV  
PLVGRSGILGELHNNVFCGVACGRGRMAGNTFCVSYSGLLCQFNEKRVLEKWINLKVLSLS  
SCLCVSEDLIFCGCTDGTVRIFQAADMHYVTNLPKPHYLGVDAQGLDPSFLFSRKAQSV  
YPDTVALAFDPHHHLSCVYKDHSIYVVDILDLTKVGKVVSDLFHSSYVWVVEVYPEFED  
QRACLPSGSFLTCSNDNTIRFWNMESSPTSGRPKNVFSNNLLKVYVENDIQHLQDISHF  
PDRGNENGTVPVDMKSGVRVMQVSPDGQHLASGDRSGNLRRIHELRFMDELIKVEAHDAEVL  
CLEYSKPETGVTLLASASRDRLIHVLNVDKNYNLEQTLDDHSSSITAIFAGNRDIQMIS  
CGADKSIYFRSAQKVS DGLHFVVRTHHVAEKTTLYDMDIDITQKYVAVACQDRNVRVYNTV  
NGKQKKCYKGSQGGDGLLKVHVDPSGTFLATSCSDKSI SVIDFYSGECIAKMFHSEIV  
TGMKFTYDCRHLITVSGDSCVFIWQLGPEITSCMKQHLMEIDHIEQQKKLKERKWTSQLR  
RETYMSVPSGTCSLSPGEQTEDELEEECEPEELLKTPTKDSFETDPRCLLTNGKLPWAK  
RLLGDEDDVDGATFHAKRSYQPHGRWAERADREPIKTILDARDLNYYFSPVNPVLEDSGL  
EKVEPQNLALQLNETEGQEDPSQTEGGFQCPDFLQDLLESSKESDII IYTTLEPEALPEKR  
LQSEYHMKEVDIPPSQRGNGLRVGKSVLKGDLDSRVRELQPEGGDSLESEAETEVEPADL  
EGSFKAIHSSPPQPKAEKSPLELMPLVPDAESTLEVELIGPEGPVPPSSSLPQTPEQEKF  
LRHFFETLTDAPHEGSLKDMEAPEVDTESEKHFFLNPRLSISAQFLSRFQKSPRFAHTFP  
PTLPLQLVKPLEAVALGRDGPQAQRSYEAADASDGLLGGKAAKSTETPAPASWCPLISGV  
TGMGSGPPSEALMGPSLEERARKSKQSPPLPCTLARGGREPRARSYLESTTSSRAKMSR  
SVSLGENLTPTLTPPRPPNGLRRPLSMGELSMGQDGQPSAPAREPSAPERGPDLPLWGN  
HEARASRLDLPNVCDPLRMPRPPPPAPAPAPRPPPEMKAMGLYEPGFHLRSLGAQPPVQ  
ALPEGPAAIESVGPGRGIASETPLLEPPSGECDHPKGSPLPPPAQRPGLGPSHIATMRNVE  
SVTQKLQRSFQEAALDLYKMVVSSPQMSGEQQQIRAELSSTFLWIQQGLEAMTWLGVSPSP  
ATSPAPGLPSPLLWLSLPSSEVRALLEHYSELLVQAVRRKAGGR

>Monodelphis domestica\_WDR62

MAALEPGVGGYGRSEAGTRGEKEKQPGPVSSRRTLVSPPPPPPPLCLKRRLKLLPGPEE  
TVQSRVTLEKVLGITAQNSSGLTCDPNTGYIAYLAGCVVVVLDPKKSKQQHIFNTARKAL  
SALSFS PDGRYIVTGENGHRPAVRIWDVEEKSQVAEMLGHKYGVACVAFSPNMKHIVSMG  
YQHDMNVNVWDWKKDSVVASNKVSCKVIAISFSEDSSYFVTVGHRHVKFWFLEVSKEVKV  
TGTVPLVGRSGILGELHNNVFCGVACGRGRMAGNTFCVSYSGLLCQFNEKRVLEKWINLK  
VLSLSSCLCVSEDLIFCGCTDGTVRIFQTHDMHYVTNLPKPHYLGVDAQGLDPSFLFCRK  
AQAVYPDTVALAFDPCHYWLSCVYKDHSIYVVDIRDLSKVGKVVSDLFHSSYVWVVEVYP  
EFEDQRACLPSGSFLTCSNDNTIRFWNMENSPTSGRPKNVFSNNLLKVYVENDIQHLQD  
ISHFPDRGNENGTVPVDMKSGVRVMQVSPDGQHLASGDRSGNLRRIHELRFMDELIKVEAHD  
AEVLCLEYSKPETGMTLLASASRDRLIHVLNVEKNYNLEQTLDDHSSSITAIFAGNRDI  
QMISCGADKSIYFRSAQKVS DGLHFVVRTHHVAEKTTLYDMDIDITQKYVAVACQDRNVRV  
YNTVNGKQKKCYKGSQGGDGLLKVHVDPSGTFLATSCSDKSI SVIDFYSGECIAKMFH  
SEIVTGMKFTYDCRHLITVSGDSCVFIWQLGPEITNCKMKQHLLEIDHIEQQKMKDKGWT  
SQLRRETYVSMPSGTHSLSPGEQTEDELEEECEQEELLKTPTKDSFETDPRCLLTNGKLP  
LWAKRLLGDDDDVDGATFHAKRSYQPHGRWAERADREPIKTILDARDLNYYFSPVNPVLE  
DSGLEKVEPQSLTQLLTETEGQEGGSQREGSFQHPDFLQDLLESPKSNDII IYNLESEAI  
PGKSEYRLKEADVSSSQRGNGYL RGPVTLTGELDSCTLEQQPEGGESLESEAETEAEVTD  
LEGGFKAILSSSPQPKAEKSSFDPIQAPESTSEVELSGSEGPGPPGSSSLPQTPEQEKFL  
RHHFFETLTDAPHEELFNDTLKDVEPEMDADSEKSFFLNSRLSMSTQFLSRFQKNSRFAH  
TFPPTLPLQLVKPLEAVLRRREGGKSVRTNRSCNNAEASDGLPGEKEAESPETPEPASWC  
PLASGITGIGPNPPPEALLGLPLEKERERKPKRSPPLPSSVARGSRALPARSYAEATMSS  
RAKMSRSVSLGENVVPALYGLKRPLSMGELSTLGRDGLPSRTRELNSLEGNQNQPPWGNH  
EARAGLRLDLTNVSDQFLLPLAPTVIPGPPETGLGRGWTKGSIATVEAVPAEFLASDTPT  
EMKAPGLYEPDFLQRLSGPEPPARAHTESPAAMESRGPRI GSEAPLLDPPPAQLGMSSV  
ECITQKLQRSFQEAALDLYNMVVSSPRMGQQQVLAELSSTFLWIQQQLDAMAWLCGEEV  
VQPPSPSLSPALSPAQGLALAPAPASAWTLPSPAVSPAPGLPTPLLWLSLPSSEVRALLE

HYSELLVQAVRRKAGGREL RAGQGSRA

>Ornithorhynchus anatinus\_WDR62

QVTLEKVLGITAQNSSGLDCDPSTGQIAYLAGCLLCDKHGSKHRGRYESVGP RKTL SAVS  
FSPDGKFI V T G E N G H R P A V R V W D V D E K T Q V V Q L L G H K Y G V A C A A F S P S V R Y I V S V G S Q H D  
M V V N V W D W K V P N R D G A G D E G A T G L G S S E P R P L R A P G S E P A L W T N E A T E A Q R S E M T S T V P L  
V G R S G I L G E L H N N V F C G V A C G R G Q L A G T T F C V A R S G L L C Q F N E K R V L E R W I D L K V S L S S C  
L C V S D E L I F C G C T D G T V R I F R A R D M H Y L L N L P K P H H L G I D V A Q G P E P G S F L F S R R A E S V Y  
P D T V A L A F D P C R R W L S C V Y K D H S V Y V W D V G D L K K A G K V W S N L F H S S Y V W N V E V Y P E F E D Q  
R A C L P S G S F L T C S S D N T I R F W N V D G D T R A G D P G N G F S H D L L K V V Y V E N D I E H L Q D G A H P P  
D R S E A G G C V D V K A G V R V M Q V S P G Q H L A S G D R S G N L H R I H E L K F M G E L I K V E A H D A E V L C L  
E Y S K P E T G V T L L A S A S R D R L I H V L N V E K N Y N L E Q T L D D H S S I T A V K F A G N R D L Q M I S C G  
A D K S I Y F R R A Q Q L T P N I K F L G P K N R V K S F K F Y E F H F R P A R P S R P P A H P L L H P R V Y N T A S G  
K Q K K C Y K G S Q G D D G S L L K V G R G P R G P G S G T P V G K H L L S P F C V Q N T V C L S S L I W T T E K I I T  
G M K F T Y D C R H L I T V S G D

>Anolis carolinensis\_WDR62

QV L L E K V L G I T T Q T S S G F A C D P N T G Q V A Y P T G C V V V I L N P R K N K Q R H I F N T S R K T V S A L S  
F S P D G K Y I V T G E S G H H P A V R V W E V E D K T Q V S E L H G H K H G V A C V A F S P S M K Y L V S V G Y P H D  
M V V N V W D W K K G T L I A S N K V S S K V M A I S F S E D S Y F V T V G H R H V K F W F L D V A R E I K I K E T V P  
L V G R S G L L G E L H N N I F C D V A C G R G R M A R S T F C I S F S G L L C Q F N E K R V L E K W I D L K N I Q L L  
H F L K V S L A N C I C I S E E F I F C G G A G T V R I F Q T H N L H Y L S D L P K P H P L D V N V A S C T K C I R L H  
S P V T R P D A I F P D S I A L A Y D P C H H W L S C V Y K D H S V Y I W D V K D F S R V G K I W S D L F H S S F V W N  
V E V Y P E F E D H Q S C L P A G S F L T C S S D N T I R F W S L E N D T Q T H F P R N I Y S N N L L E V L Y V E K N T  
Q Q L Q D T T N A P D R G E N T N H L D A K S G V H V M S V S P D G Q H L A S G D R A G N L R I H E L R C M G E V M K L  
E A H D S E V L S L E Y S K P E T G M S L L A S A S R D R L I H V L N V E K N Y K L E Q T L D D H S S A I T A V K F T G  
S G D V K M I S C G A D K S I Y F R N A Q K V S L M G L T F V R T H H V A G K T T L Y D M D I D I T Q K Y V A V A C Q D  
R N V R I Y N I A S G K L L W G Y K G S Q G D D G Y L L K V Q F D P S G T F L A T S C S D K S I S I I D F H T G E C V A  
K M F G H S

>Pelodiscus sinensis\_WDR62

M L E K V L G I T T Q T S S G L A C D P N T G Q I A Y P A G C V V V I L N P Q K N K Q R H I F N T S R K T L S A L S F S  
P D G K F I V T G E N G H R P A V R V W D V E E K T Q V S E L H G H K H G V G C V A F S P N M K Y I V S V G Y Q H D M T  
V N V W D W K K N T L V A S N K V S C K V M A I S F S E D S Y F V T V G H R H V K F W F L D A S R E V K I K E T V P L V  
G R S G L L G E L H N N I F C G V A C G Q G K M L G N T F C V S Y S G L L C Q F N E K R M L E K W I D L K V S V A N C I  
C V S E E F I F C G C A N G T V R I F Y S H N M H Y L S D L P K P H S L G V D V A K E L E P R K P D S V Y P D T I A L A  
F D P C N C W L S C V Y K D H S I Y I W D V K D T N K V G K V W S D L F H S S F V W N V E V Y P E F E D H R S C L P P G  
S F L T C S S D N T I R F W N V E S G T G P M F Q K N I Y S N N L L K V V Y V D N N N Q H L Q D S A I V P D R N E N A G  
H L D V K A G V R V M Q I S P D G Q H L A S G D R G G N L R I H E L Q F M H E V I K V E A H D S E V L C L E Y S K P E T  
G M A L L A S A S R D R L I H V L N V D K K Y K L E Q T L D D H S S A I T A V K F A G N G E V Q M I S C G A D K S I Y F  
R S A Q K V A D G I N F I R T H H V A E K T T L Y D M D I D I T Q K Y V A V A C Q D R N V R V Y N T V S G K Q K W C Y K  
G S Q G D D G S L L K V Q L D L S G T F L A T S C S D K S I S I I D F H S G E C V A K M F G H S E L V T G M K F T Y D C  
K H L I T V S G D S C V F L W H L G P E I T N C M K Q H L V E L N Q I Q Q R K A R E L S W S N P V R R E T Y D A V P S  
G R M A Q K V E E P T D Y E T D E E K E E E S S L Q T P A K E D F D T D P T C I L T N G K L P M W A K R L L G E A E N L  
D S M T F N S R M N Y Q P Q G R W A E R A D K E P I K T L L D T Q I S Y F T P I K N D F L D D A E L E P K N L E Q L L L  
E T E N S P S N V I E D F K R P V L V S E D E T N P E S E S L E T S G N S I Y D A Q G G D S S L E A E S K Y G K E L H L  
Q P V Y Q K E V C I G K D Q S C P V T S L D S E T S A F D Q Q E D E D S M G S D G E L D M E T E A T D L D E N F P K N  
S S L P Q T P E Q E K Y L K H H F E T L A D A H A E E K F D G C L K D L K P P E D V D D G K H L F L N P R L S I S A R F  
L S R C Q K N S R F A A F L P R A R Q Q L Q N T T D V I D Q S K E E S K L S S E H K K S E K P L E E K P V E V E K T D  
S S V C S P S E T Q I L M K S F E T N L Q P L H A A F Q E T L Q L Y D K L T S H K E S T E E E L L Q V K T M L A S T F S  
W M K T E L D S R A V K N N A D V A T A T D S P S P Q L K S L H D N E T L Y L L K H Y S E S L V R M V Q K K L D D C V K  
P E

>Columba livia\_WDR62

M G H G G Q E G P L G A P P C P P P C P L M S P Q V T L E K V L G I T V Q S G S G L A C D P A T G L L A Y P A G K T L S  
A L A F S P D G K L I V T G E T G H R P A V R V W D V E E R A Q L A A L H G H K H G V A C V A F S P S A R Y L V S V G A  
P H D M L V N V W L W K K E A L V A S N K V S C S V T A V S F A D D R Y F V T V G H R H V K F W F L D P A R E M K V T M

TVPLAGRAGLLGELHDAVFCAVACGRGSGATFCVSSSGLLCRLNHNKRALEKWIVLKRRHV  
PISTSMHRPPQHPKYTPKTSARTPHPPPNNRRGDPVYPDTVALAFDPVRRHLSCVYKDHSV  
YVWVDSDLRRVGTVCALFHSSVVWSVEVYPEMEGRRSRLPPGSFLTCSDDNTIRAWSME  
SGGGHGRAWGDFEQAWGDFEQDLGNFERISVILSRIWGDVEQVWGDVEQDLDDFEQIWGD  
FEQDLGDFARISVIFEQDLGNFERISVIFKQVWGDVEQDVGDVEQIWGDVEQIWGDVEQI  
SVIFEQVWGDVEQDLGSDRVSHQPQLLGTIHVEQPAQQLPDARAGVRVLQISPDGEHLA  
SGDRAGTLRIHELRFMREVAKVEAHDAEVLCELYSKPETGAALLASASRDRLIHVLNVAK  
NYKLEQTLDDHSSAITSVKFAGNGDVQLISCGADKSIYFRNAQKLPDGFNFVVRTHHVAEK  
TTLYDMDIDITQKYVAVACQDRNVRVYSTASGKLRCCYKGSBGDDGSLKLVQLDPSGTFV  
ATSCSDKISISLINFHSGECVAKMFGHSGSVPLPKAPTPFFHKTPPKSAPVTPSPGPRRD  
NPFCIFIWHLGPKITGTMRQDLLELERAKEPHGRDPDVTVPDIPFRPFFIHPPAPA  
CVLTINGRLPVWAKRLLGELEDATEPLPPRSSYRPRGRWAEGLADRAVEPGSLEQLLAEAE  
SSGSDLAEESSQILDDSQITADSQITGEPQITGDSPEPESPPGPGLEPKRPGVTLSPPS  
LSPSPPCPHRPRPHRCLRHPLVPIALIPITPLSPSSSHCSVSPTCHLPSRHHVTEPPL  
RPVSPPEPVS PREPVSPEEPVSPEEPLSPREPVSPEELVSPGEPVSPREPVSPEEPVSPE  
EPLSPREPVS PREPVSPEEPVSPEDVVTGQDDTLSCISLHSQSSMLEGDTGDNARGDRR  
KGGHVIKECRVTRVTKGHEVPVTARGRRRCHRGATNPPDPPEPFGASLKDLPPEEKS  
SILNPRLSISSWFLSRCRKNRWVARPSVRPRVRVPSPTPSLVPQVVGHPGPPETAGESEK  
DENLGETGTETGDWPKRGFFSPKRPRREDAAPAGVERVTAALGELRTRCQDALSVYDQVG  
TQKRGEKPNLGGFGGHSRHPRHEDRFWGHLLWKGPPKKWGDKGYG

>Xenopus tropicalis\_WDR62

MSDCSEHGRNIHGFQPPSPGRRKSSRVQSGNAGNGRGHRQVELEKVLGITVSSNSSIT  
CDPISGLIAYPAGCVIVVLCPRKNKQTHIFNTCRKPLSALSFSPPNGKFI VTGESGHNPV  
RIWDVAEKVLVSEMLGHKYGVSCVCFSPDMKYVVS VGYQHDMVINVWDWKVNMIVAKNKV  
SSKVS AVSFSESSYFVTVGSRHVKFWYLETSKKIQVNGTVPLVGRSGLLGDLDHNI FCG  
VACGKGSNSRSTFCIAYSGVLCQFTDKRVLEKWI KLKVSASVCLAVTELFVFCGEDGIV  
RIFNAQNLQYITDLPKPHYLGVDDVSLGTDPTLFTKQTDSSYPDTSALVYDERNQWLCCV  
YNDHSLYVWDVNDTRKVKYVSYGLYHSSVWNIEVFPELGERPCLPSGCFSCSSDNTIR  
LWNIERNANLYLGNKIYSNDLHKVIYVDNNIEHLKDTSSMAEKSDVRDTKSGIRVLKIRP  
DGQHLASGDRTNIRIYDLGIFDELLTIEAHDGEVLCLEYSK PSTGVTLLASASRDRLIH  
VLNAEKDYILEQTLDDHSSITAVKFAQDQEEILMISCGADKSIYFRPAQMLPDGIHFSR  
LHHTVEKTAMYDMDVDVSKTVAVACQDKNIRLYSISGKQEKILKSSPNGGALLKVQID  
PSGTFFTTSCSSKNISFFDLGEGCIAEVYGHSDLVTDKFTNDCKRLITVSGDSCVFIW  
KLDPAMTACMKQRLIELGIFGEQKTTCYDECLNNRRETYITNLLGESVQNEIFMDSSYE  
TDDSSTQTPSKKTNEADPAFLKTNKGMP LWRKLDKQDPLLNQNTINVYQPRGRWAQSD  
SNI IIMKSLDTEKSYCFSPDQEE TGHFLLHDKTDFVFAEPQNFQHLLESEERNVHSLAN  
ETCVQDLSDESDSVKSHSLDSNGGIFYPSSLQLSGQEE SDYAI EEHQIFSDTFDMSDVRT  
MHDFLPSCHQDKDEESLTSETCSEADLDENELPGTSQPHTPEEEKFLLKHFDTLIDDFSE  
ERFDYSLKDLKPPDDDDHDFIQNPRLSFSKFLSRCQKTSRPENS DLPLEQQVKT P SPIL  
GNDEQISHSKTFSEKPTEDKLLDTLEKNKNVNATDFSKLCHLQKVQMNEKVASRSSFP  
VSSKNGAFNKPKKGRSYMDATASSKAKIFRSVSMGDSLNTSHSEGQKKS NL SRPASSND  
LLSLEQNNCYN AEDNLCDPAPILTTNKPATSGYMNEHVQDSPDKLLMPPPLSCVVI PRK  
RKAQSASNLAKPPGKEDQHDIVRKNKNKESRRSGVENSINTKNSFRSSLTTSKTANMAD  
SSRRASVAE IPTCKNEFQEVEDHKNE SHMVAVVTSNEMATLSTMPFASNHDSHGAKVLLG  
KCEAVIENLCSAFQKTLELYSEIDICGGSHEEKQOMKSLFYASFNIH RSEMDLIETDQNT  
NTANNKNSRRNEHQERNPTLDLLEHYSEMMLKVMKEKIASN

>Latimeria chalumnae\_WDR62

SGHLP AVRVDVEEKVQLAETQCHKYGVSCVAFSPNMYIVSVGYQHDMIVNVWEWKD  
TIANKNVSSKVTAVSFSESSYFVTVGNRHVKFWYLDASKERRINATVPLIGRSGLLGEL  
RNNYFCGVACGRGKMAGSTFCITSAGLLCQFNEKRLLDKWIDLRLISNCISVSEEFIFC  
GCGDGTVRVFKPQNLHYITSLKPHYLGVDAKGI EPSLLFTKKLDVYPTIALSFD PQ  
RCWLSVYSDHSLYVWDVNDTKKVGKVVSGLFHSSCVWSVEVYPDLEGDDRACFP PPSFL  
TCSSDNTIRLWNMERNNPVPHPTAFHRNIYSHDLHKVYVDDDLQFLQCTAGG SERLDG  
GSTTDMKSGIRVMKISPDGQHLASGDRRGNLR IHDHLVLEILKVEAHDAEVLCELYFKL  
DPGLTLLASASRDRLIHILNVDNGYSLEQTLDDHSSITAVKIVASDDEM RMISCGADKS

IYFRTAQKSVDGIQFSRTHHVVGKTTLYDMDIDSTHKYAAVGCQDRNIRVYNVISGKEKR  
CFKGAQGEDGTLKLVQMDPSGTLTATSCTDKNISIFDFYTGECVGTMFHSELVTGMKFT  
NDCRYLITVSGDSCIFVWRLDSQMTDCMRNRLEEIKQTRRQERTPQRKQPVPIRRITYIA  
VPCPTQPQIEEEDDSEEDVEDDESLOTPIKDPGADDMDPAFLLTNGGLPLWAKRLEAGE  
NCIQNLVEQNPKKIYRPHGRWAESADQDLLKRILETMPLQPTLTPTPSRVTLERGPLDSF  
PFEQEGREEFKPQNLENLLEEMESAAADQQRGEHFSRPDLIPLLENIDGANVDLESPDSSE  
NILYPLQLEDELLNSCRRKLEDSERLGQVLGPCITSLHACCVGSADSQSSSVEQQQDGN  
SFTMHIWGGILFFGSPYVLHRTCSFNVDLQSLSSDEGSSELEEEETEVEVWGSPLQEASIP  
QTPEQEKFLLKQHFETLAEDLIEEFDRSPKDLKPTEDHGNDIFLHPRLSISARFLSRCQK  
NSSFSRWYPSLFLGTSITLLKYFLSIRKLDVKHCYTNRKTCKNAGYFVELIALVYRITGI  
AAGYREGIFISQPLAFSRFRKPSTQYKETSQNKGTGRERSFMVATASSRAKMSRSQSMGEN  
LNLKSSEEQSKQSFMSRATSNMMLVGTATENLPPKQNGQNNPSYGNHQARVKLTLNIQKV  
ASDQSLMPPPLISAVTKVKQKPHEPLKTLVSAVTPTEMKSLGIDKSCYVNEL

>Danio rerio\_WDR62

MADGAVNFGASMNQSLTSRAKKANNNSTSVPANTRRKTRQSHRRDIHNRVVLEKVLGIT  
ASSSSALTCDPNTGLVAYPAGCVIVILSPKKNKQTHIFNTSRKTF SALAFSQNGKYLVTG  
ESGHMPCVRVWDVAERTQVAEVQCHKYGVSCVAFSPNGSYIVSVGYQHDRTVSVWEWKKG  
TVIASNKVSSRVLVGVSFSEDNSYFVTAGNRHVKFWYLDASKERRVNSTVPLIGRSGLLGE  
HQNSQFCGLACGRGSMASSTYCIHTGLLCQFNNSRQLDSWVDLKTTSAQCLSVSGTFVF  
CGCADGTVRVFSPQDLRYITTLHRPHCLGVDVSQGTQPGHLFSANPEAQYPDTLALTFDP  
VTKHLTCVYNDHSVYVWDVDRDIRNVGKVYSALYHSGCVWSVETYPELEDPSAACLSPGSF  
LTCSSDNTIRLWRSESPQSHSAAALGLRHNLYSQDIVRIVYVDDDTQYLKAEAEKAEGGAG  
QDGKSGIRVLGISPDGQHLAAGDRSGNLRIFGLQFMDELQKIEAHDSEVLCLAFSPAETG  
LHLLASASRDRLIHIFDMDSKCNLVQTVYDHSASITAVKFTGLNSELCMVSCGADKSVYF  
RSAEKTSDGLVFSRSHHIVEKTTLYDMDLDATRTHTAIACQDRNIRVYNVKS GKMKKCFK  
GSMNDDGTLKLVQLDPSGMFLATSCSDKNICVFDYSESGECVATLFGHSEIVTGMKFSQDC  
RHLITVSGDSCVFWRLDSQMTNSMRKRLAERKQOAGLRLQRAPTKQEVIRRITYITVPC  
NALTHMEEDGLMAEVNPEADGLEDCRTPDRLDSTDASLDSVVLQTNKMPMWRRLGGEGE  
KDGTGAANRQVYQPPQRWAVQSDPLAIRTVLEMKSNQLPLSHTPSRVMGEELEEDPRFH  
PQSLDSLLEDDEGEDEEEEEKICGVSSDGFSSSLHGPEFLQFPHGEEFNPELSSSEKT  
GYILYPANSTALSTGEGEFDVKALCEGTAGDPDEEELSPDSACSAESPESHSDQPHDQDT  
DSLSQVSSSTGSSGVEEDEEESGTLRQHFDTLGVATNEKFNTDLSSLQPTTESNFLNPRL  
SISTRFLSRFQSRFRSAACRPAACLSSIPDESTDSQTLDQTMKPKHLSNSGVSVEEKEKT  
VIKRRSSMSSRRSSNPSLLRWKNALGEITNKNQSTTQSTTSAPGVL SNKSTSNSCDASVT  
RSRQSYMGP TASSRAKINQSNVSESLNLCISEETPLNALPNVEHSKENMIPPSSPVVSSA  
PLHQSPVLGNHSARASRLDLIGHNRASLSPVSLKSRRGKVEHHDSPRRQALVTPTEMRS  
LGKESRKQISNIEQSLAPSDRLSTGAGMFSRSPMVRQTSDTVFE DLQSVRSQTSVSSPM  
TNAVSQDNQDSADNNSIPEETGLSAEALSVQMCKEMVNELWHTIHKATDLYSKLCSIPEL  
SEQQE QMKGVLQEVFVGVQSELNSICPQKTQPSTKSTRPIS EDSPPGRQLRDDRAVALLEK  
YSEMLLLRMTEKGAQATLE

>Homo Sapiens\_MAPKBP1

MAVEGSTITSRIKNLLRSPSIKLRKAGNRREDLSSKVTLEKVLGITVSGRGLACDPR  
SGLVAYPAGCVVFLFNPRKHKQHHLNSSRKTITAFSPDGKYLVTGEGHMPAVRVWD  
VAEHSQVAELQEHKYGVACVAFSPSAKYIVSVGYQHDMIVNVWAWKKNIVVASNKVSSRV  
TAVSFSEDCSYFVTAGNRHIKFWYLDSDSKT SKVNATVPLLGRSGLLGELRNNLFTDVACG  
RGKADSTFCITSSGLLCEFSDRRLLDKWEVLRNIDSFTTTVAHCISVSQDYIFCGCADG  
TVRLFNPSNLHFLSTLPRPHALGTDIASVTEASRLFSGVANARYPDTIALTFDPTNQWLS  
CVYNDHSIYVWDVDRPKKVGKVYSALYHSSCVWSVEVYPEVKDSNQAACLPPSSFITCSSD  
NTIRLWNTESG VHGSTLHRNILLSDLIKI IYVDGNTQALLDTELPGGDKADASLLDPRV  
GIRSVCVSPNGQHLASGDRMGLTRVHELQSLSEMLKVEAHDSEILCLEYSKPDTGLKLLA  
SASRDRLIHVLDAGREYSLOQTLD EHSSTITAVKFAASDGQVRMISCGADKSIYFRTAQK  
SGDGVQFTRTHHVVRKTTLYDMDVEPSWKYTAIGCQDRNIRIFNISSGKQKFLKGSQGE  
DGTLIKVQTDPSGIYIATSCSDKNLSIFDFSSGECVATMFHSEIVTGMKFSNDCKHLIS  
VSGDSCIFVWRLSSEMTISMRQLAELRQRQRGGKQGPSSPQRASGPNRHQAPSMLSPG  
PALSSDSDKEGEDEGTEEELPALPVLAKSTKKALASVSPALPRSLSHWEMSRAQESVGF



LDPAPAANPGRRRGRWVQPGVELSVRSMLDLRQLETLAPSLQDPSQDSLAIIPSGPRKH  
GQEALETSLTSQNEKPPRPQASQPCSYPHIIRLLSQEEGVFAQDLEPAPIEDGIVYPEPS  
DNPTMDTSEFQVQAPARGTLGRVYPGSRSSSEKHSPDSACSVDYSSSCLSSPEHPTEDSES  
TEPLSVDGISSDLEEPAEGDEEEEEEGMGYPYGLQEGSPQTPDQEQLKQHFETLASGA  
APGAPVQVPERSESRSSISSRFLQVQTRPLREPSPPSSSLALMSRPAQVPQASGEQPRGN  
GANPPGAPPEVEPSSGNPSPQQAASVLLPRCLNPDSSWAPKRVATASPFSGLQKAQSVH  
SLVPQERHEASLQAPSPGALLSREIEAQDGLGSLPPADGRPSRPHSYQNPTTSSMAKISR  
SISVGENLGLVAEPQAHAPIRVSPLSKLALPSRAHLVLDIPKPLPDRPTLAAFSPVTKGR  
APGEAEKPGFPVGLGKAHSTTERWACLGEGETTPKPRTECQAHGPPSSPCAQQLPVSSLFQ  
GPNLQPPPEKTPNPMECTKPGAALSQDSEPAVSLEQCEQLVAELRGSVRQAVRLYHSV  
AGCKMPSAEQSRIAQLLRDTFSSVRQELEAVAGAVLSSPGSSPGAVGAEQTQALLEQYSE  
LLRAVERRMERKL

>Gorilla gorilla\_MAPKBP1

MAVEGSTITSRIKNLLRSPSIKLRRSKAGNRREDLSSKVTLEKVLGITVSGGRGLACDPS  
GLVAYPAGCVVVLFNPRKHKQHHLNSSRKTITALAFSPDGKYLVTGESGHMPAVRVWDV  
AEHSQVAELQEHKYGVACVAFSPSAKYIVSVGYQHDMIVNVWAWKKNIVVASNKVSSRVT  
AVSFSEDCSYFVTAGNRHIKFWYLDLDDSKTSKVNATVPLLGRSGLLGELRNNLFTDVACGR  
GKKADSTFCITSSGLLCEFSDRRLLDKWVELRNIDSFTTTVAHCISVSQDYIFCGCADGT  
VRLFNPSNLHFLSTLPRPHALGTDIASVTEASRLFSGVANGRYPDTIALTFDPTNEWLSC  
VYNDHSIYVWDVRDPKVKGVYSALYHSSCVWSVEVYPEVKDSNQAACLPPSSFITCSDN  
TIRLWNTESSGVHGSTLHRNILSSDLIKIIVVDGNTQALLDTELPGGDKADASLLDPRVG  
IRSVCVSPNGQHLASGDRMGTLRVHELQSLSEMLKVEAHDSQILCLEYSKPDGTGLKLLAS  
ASRDRLIHVLDAGREYSLQQLDEHSSITAVKFAASDGQVRMISCGADKSIYFRTAQKS  
GDGVQFTWTHVVRKTTLYDMDVEPSWKYMAISCQDRNIRIFNISSGKQKFLFKGSQGED  
GTLIKVQTDPSGIYIATSCSDKNLSIFDFSSGECVATMFGHSEIVTGMKFSNDCKHLISV  
SGDSCIFVWRLSSEMTISMRQLAELRQRQGGKQGGPSSPQKASGPNRHQAPSMLSPGP  
ALSSDSDKEGEDEGTEEELPALPVLAKSTKKALASVPSPALPRSLSHWEMSRAQESVGF  
DPAPAANPGRRRGRWVQPGVELSVRSMLDLRQLETLAPSLQDPSQDSLAIIPSGPRKH  
QQALETSLTSQNEKPPRPQASQPCSYPHIIRLLSQEEGVFAQDLEPAPIEDGIVYPEPSD  
SPTMDTSEFQVQAPARGTLGRVYPGSRSSSEKHSPDSACSVAYSSSCLSSPEHPTEDSEST  
EPLSVNGISSDLEEPAEGDEEEEEEGDVGYPYGLQEGSPQTPDQEQLKQHFETLASGAA  
PGAPVQVPERSESRSSISSRFLQVQTRPLREPSPPSSSLALMSRPAQVPQASGEQPRGNG  
ANPPGAPPEVEPSSGNPSPQQAASVLLPRCHLSPDSSWAPKRVATASPFSGLQKAQSVHS  
LVPQERDEASLQAPSPGALLSQEMEAQDGLGSLPPADGRPSRPHSYQNSTTSSMAKISRS  
ISVGENLGLVAEPQAHAPIRVSPLSKLALPSRAHLVLDIPKPLPDRPTLAAFSPVTKGRA  
PGEAEKPGFPVGLGKAHSTTERWACLGEGETTPKPRTECQAHGPPSSPCAQQLPVSSLFQ  
PENLQPPPEKTPNPMECTKPGAALSQDSEPAVSLEQCEQLVAELRGSVRQAMRLYHSVA  
GCKMPSAEQSRIAQLLRDTFSSVRQELEAVAGAVLSSPGSSPGAVGAKQTQALLEQYSEL  
LLRAVERRMERKL

>Pongo abelli\_MAPKBP1

MAVEGSTITSRIKNLLRSPSIKLRRSKAGNRREDLSSKVTLEKVLGITVSGGRGLACDPR  
SGLVAYPAGCVVVLFNPRKHKQHHLNSSRKTITALAFSPDGKYLVTGESGHMPAVRVWD  
VAEHSQVAELQEHKYGVACVAFSPSAKYIVSVGYQHDMIVNVWAWKKNIVVASNKVSSRV  
TAVSFSEDCSYFVTAGNRHIKFWYLDLDDSKTSKVNATVPLLGRSGLLGELRNNLFTDVACG  
RGKKADSTFCITSSGLLCEFSDRRLLDKWVELRNIDSFTTTVAHCISVSQDYIFCGCADG  
TVRLFNPSNLHFLSTLPRPHALGTDIASVTEASRLFSGVANARYPDTIALTFDPTNQWLS  
CVYNDHSIYVWDVRDPKVKGVYSALYHSSCVWSVEVYPEVKDSNQAACLPPSSFITCSDN  
NTIRLWNTESSGVHGSTLHRNILSSDLIKIIVVDGNTQALLDTELPGGDKADASLLDPRV  
GIRSVCVSPNGQHLASGDRMGTLRVHELQSLSEMLKVEAHDSQILCLEYSKPDGTGLKLLA  
SASRDRLIHVLDAGREYSLQQLDEHSSITAVKFAASDGQVRMISCGADKSIYFRTAQK  
SGDGVQFTTRTHVVRKTTLYDMDVEPSWKYTAIGCQDRNIRIFNISSGKQKFLFKGSQGE  
DGTLIKVQTDPSGIYIATSCSDKNLSIFDFSSGECVATMFGHSEIVTGMKFSNDCKHLIS  
VSGDSCIFVWRLSSEMTISMRQLAELRQRQGGKQGGPSSPQRASGPNRHQAPSMLSPG  
PALSSDSDKEGEDEGTEEELPALPVLAKSTKKALASVPSPALPRSLSHWEMSRAQEPVGF  
LDPAPAANPGRRRGRWVQPGVELSVRSMLDLRQLETLAPSPQDPSQDLLAIIPSGPRKH

GQQALETSLTSQNEKPPRPQASQPCSYPHI IRLLSQEEGVFAQDLEPAPVEDGIVYPEQS  
DSPTMDTSEFQVQAPARGTLGRVYPGSRSSSEKHSPDSACSVDYSSSCLSSPEHPTEDSES  
TEPLSVDGISSDLEEPAEGDEEEEEEGMGYPYGLQEGSPQTPDQEQFLKQHFETLANGAA  
PGAPVKVPERSESRSISSRFLLQVQTRPLREPSPPSSSSALMSRPAQVPQASGEQSRGNG  
ANPPGAPPEVEPSSGNPSPQEAASVLLPRCRLNPDSSWAPKRVAITSPLSGLQKAQSVHS  
LVPQERDEAGLQAPSPGALLSREIEAQDGLGSLPSADGRPSRPHSYQNPTTSSMAKISRS  
ISVGENLGLVAEPQAHAPIRVSPLSKLALPSRAHLVLDIPKPLPDRPTLAAFSPVTKGRA  
PGEAEPGFVGLGKAHSTTERWACLGEGETTPKPRTECQAHGPPSSPCAQQLPVSSLLQG  
PEDLQPPPEKTPNPMECTKPGAALSQDSEPAVSLEQCEQLVAELRGSVRQAVRLYHLVA  
GCKMPSAEQSRITQLLRDTFSSVRQELEAVAGAVLSSPGSSPGAVGAEQTQALLEQYSEL  
LLRAVERRMERKL

>Mus musculus\_MAPKBP1

MMAGEGSTITSRIKNNLRSPSIKLRSSKAGNRREDLSSKVTLEKVLGVTVSGGRGLACDP  
RSGLVAYPAGCVVFLNPRKHKQHHLNSSRKTITALAFSPDGKYLVTGESGHMPAVRVW  
DVAERSQVAELQEHKYGVACVAFSPSAKYIVSVGYQHDMIVNVWAWKKNIVVASNKVSSR  
VTAVSFSEDCSYFVTAGNRHIKFWYLDSDKTSKVNATVPLLGRSGLLGELRNNLFTDVAC  
GRGEKADSTFCITSSGLLCEFSRRLLDKWVELRRTTVAHCISVTQEYIFCGCADGTVRLF  
NPSNLHFLSTLPRPHALGTDIASITEASRLFSGGVNARYPDTIALTFDPTNQWLSVYND  
HSIYVWDVRDPKVKGVYSALYHSSCVWSVEVYPEIKDSHQACLPPSSFITCSSDNTIRL  
WNTESGSHVHSTLHRNILSNDLIKIIYVDGNTQALLDTELPGGDKADGSLMDPRVGI  
CISPNGQHLASGDRMGTLRIHELQSLSEMLKVEAHDSEILCLEYSKPDGTGLKLLASASRD  
RLIHVLDAGREYSLQQTLDHESSSITAVKFAASDGQVRMISCGADKSIYFRTAQKSGEGV  
QFTRTHHVVRKTTLYDMDVEPSWKYTAIGCQDRNIRIFNISSGKQKFLKGSQGEDGT  
KVQTDPSGIYIATSCSDKNLSIFDFSSGECVATMFGHSEIVTGMKFSNDCKHLISVSGDS  
CIFVWRLSSEMTISMRQLAELRQRQRGKIQQGPTSPQRASGAKQHHPVVPSPGALSS  
DSDKEGEDEGTEEEELPALPILSKSTKKELASGSSPALLRSLSHWEMSRAQETMEYLDPA  
PVANTGPKRRGRWAQPGVELSVRSMLDLRQIETLAPSPRGPSQDSLAVSPAGPGKHGPQG  
PELSCVQNERAPRLQTSQPCSCPHIIQLLSQEEGVFAQDLEPAPIEDGIVYPEPSPDSPT  
MDTSAFQVQAPRTGGSLGRMYPGSRGSEKHSPDSACSVDYSSRLLSPEHPNEDSESTEPL  
SVDGISSDLEEPAEGDEDEEEEGGTGLCGLQEGGPHTPDQEQFLKQHFETLANGTAPGGP  
ARVLERTESQSISSRFLLQVQTSPLREPSLSSSGLALTSRPDQVSQVSGEQLKGSATPP  
GAPPEMEPSSNGSGPKQVAPVLLTRRHNNLNSWASKMAATRPLAGLQKAQSVHSLVPQ  
DEVPSRPLLFQEAETQGLGSLPQAGGCSSQPHSYQNHTTSSMAKLARSISVGENPGLA  
TEPQAPVPIRISPFNKLALPSRAHLVLDIPKPLPDRPTLTTFSPVSKGLAHNETEQSGPL  
VSLGKAHTTVEKHSCLGEGTTHKSRTTECQAYPGPNHPCAQQLPVNNLLQGPESLQPLSPE  
KTRNPVSSRPGVALSODSELALSLOQCEQLVAELQGNVRQAVELYRAVTSYKTPSAEQS  
HITRLLRDTFSSVRQELEVLAVLSSPGGSPGAVGAEQTQALLEQYSELLLRAVERRME  
RRL

>Rattus norvegicus\_MAPKBP1

MMAGEGSTITSRIKNNLRSPSIKLRSSKAGNRREDLSSKVTLEKVLGVTVSGGRGLACDP  
RSGLVAYPAGCVVFLNPRKHKQHHLNSSRKTITALAFSPDGKYLVTGESGHMPAVRVW  
DVAERNQVAELQEHKYGVACVAFSPSAKYIVSVGYQHDMIVNVWAWKKNIVVASNKVSSR  
VTAVSFSEDCSYFVTAGNRHIKFWYLDSDKTSKVNATVPLLGRSGLLGELRNNLFTDVAC  
GRGKKADSTFCITSSGLLCEFSRRLLDKWVELRNTDSFTTTTVAHCISVSQEYIFCGCAD  
GTVRLFNPSNLHFLSTLPRPHALGTDIATITEASRLFSGGANARYPDTIALTFDPANQWL  
SCVYNDHSIYVWDVRDPKVKGVYSALYHSSCVWSVEVYPEIKDSNQACLPPSSFITCSS  
DNTIRLWNTESGSHVHGSALHRNILSNDLIKIIYVDGNTQALLDTELPGGDKADGSLMDPR  
VGI  
SVCISPNGQHLASGDRMGTLRVHELQSLSELLKVEAHDSEILCLEYSKPDGTGLKLL  
ASASRDRLIHVLDAGREYSLQQTLDHESSSITAVKFAASDGQVRMISCGADKSIYFRTAQ  
KSGEGVQFTRTHHVVRKTTLYDMDVEPSWKYTAIGCQDRNIRIFNISSGKQKFLKGSQ  
EDGT  
LIKIVQTDPSGIYIATSCSDKNLSIFDFSSGECVATMFGHSEIVTGMKFSNDCKHLI  
SVSGDSCIFVWRLSSEMTISMRQLAELRQRQRGKIQQGPTSPQKASGAKQHHPVVPSP  
GPALSSDSDKEGEDEGTEEEELPALPILGKSTKKELASGSSPALLRSLSHWEMSRAQENM  
EFLGPAPTANTGPKRRGRWAQPGVELSVRSMLDLRQLETLAPSPRGPSQDSLAVSPTGPG  
KHSPQAADLSCASQNERAPRLQASQPCSCPHIIQLLSQEEGVFAQDLESAPIEDGIVYPE

PSDSPTMDTSAFQVQAPTGGSLGRVYPGSRGSEKHSPDSACSVDYSSSRLSSPEHPNEDS  
ESTEPLSVDGVSSDLEEQAEGEEEEEEEEGGTGLCGLQEGSPHTPDQEQFLKQHFETLANG  
AAPGGPARALERTESRSISSRFLQLVQTSPLREPSLSSSGLALMSRPDQVSQVSGEQLKG  
SGATPPGAPPEMEPSSGNSGPKQVAPVLLPRRRTNLDNSWASKKTAATRPLAGLQKAQSV  
HSLVPQDEVPSRPLLFQAEVQGSLSLQADGCPSQSHSYWNPTTSSVAKLARSISVGEN  
PGLAAEPQAPAPIRTSPFNKLALPSRAHLVLDIPKPLPDRPTLTTFSPVSKGLAHSETEQ  
SGPSVSLGKTHTAIEKHSCLGEGTTPKSRTECQAHPGNHPCAQQLPVSNNLLQGPEMQP  
LSPEKTRNPVSSRPGAALSQDSELALSLQQCEQLVAELRRNVQAVQLYHSVTSCKTTPS  
AEQSHITRLLRDTFSSVRQELEALDGAVLSSPPGGSPGAVGAEQTQALLEQYSELLLRVE  
RRMERRL

>Monodelphis domestica\_MAPKBP1

MPAVRVWDVVEHHQVAELQEYKGIACVAFSPSSKYIVSVGYQHDMIVIVWLWKKNVVVA  
SNKVSSRVMAVSFSEDCSYFVTAGNRHIKFWYLLDDSKTSKVNATVPLLGRSGLLGELRNN  
LFTDVACGRGKKADSTFCITSSGLLCEFSRRLLDKWVELRDTDSFTTTVAHCISVSQDY  
IFCGCADGTVRVFNPLNLHFLTTLPRPHALGTDIATITEASRLFASPADAKYPDTIALTF  
DPTNQWLSVCYNDHSLYVWDVDRPKKVGKVVYALYHSSCVWSVEVYPEVKDSNQACLPPS  
SFITCSSDNTIRLWNTESAGVHGALHRNLSNDLIKIIYVDGNTQALLDTELPNGDKT  
DGSLVDTRVGIKSVCSIPNGQHLASGDRVGTLRVHELQSLSEMLRVEAHDSEILCLEYSK  
PDTGLKLLASASRDRLIHVLDAREEYSLQOTLDEHSSSITSVKFAASDGQVRMISCGADK  
SIYFRTAQKSGDGVQFTRTHVVRKTTLYDMDVEPSWKYTAIGCQDRNIRIFNISSGKQK  
KLYKGSQGEDGTLIKVQTDPSGIYIATSCSDKSLIFDFTSGECVATMYGHSEIVTGMKF  
SNDCKHLISVSGDSCIFLWRLSSEMTISMRQLAELRQLQRGGKPKQGLSPSRRASGLNSR  
DAPTALSVVPALSSSEKDGEGEETEEELPALPILAKGAKKEPPASARGPSLPRSLSHW  
EMSRTQEGVEFLDPVPASSQGPVRRRGRWAQPGVELSVCMSMLDLRQLETLSSVPRPPS  
LAQESVAQDQPVLEKNSQRSTVDAHSSQNGSVPKSLVSKSCACSQVIQLISQEEEGVSAQ  
ELEPMNNEGGVVYPEPDSCLPLDSRSCPLDGEFQVQALPHGPLGSVYVNRSTEKHSPDS  
ACSVDYSSSRLSSPDHPNEDSESTEPLSVDGISSDLEEPAEGEEDDEEEDGGSGGGLQ  
GGSPTPDQEQFLRRHFELLANGAAPDGPQPLERTEPQSISSRFLSRVQTPRIREPPLS  
FWRPVAQQRPIRVFQAPSEKPHSGAICFPGPSPEPEPEPEPVCVSHPNMTSMLRRRRL  
NLDGSWTHKRTKTALSGSGSNLQKAQSVQNLGPQDEPPLLGPVPPENDVVQEGVGPQTQ  
GDVCPARPRSYLNSTTSSMAKMSRSSSVGENLQGELAEQVVPNPVIRITSVNKLALPRA  
HLVLDIPKPLPDRPNVAFSAGAKSQALWETQQLGSPESLGKKSVTAVGQACLGEESTLT  
PRTESQAQPGPKSSCSQELPANCLPRSPEDLQPPSPPEIPNPMPPRPGASLSQDSEPMV  
VSMERCQHVVAELRSSVHQAIQYLRLVVRTSSPSAEESTIKHLLLEDTLSTARQDLES  
LVPTASPSGSAGALATDQTQALLEQYSQLLLQAVQRRMQGRL

>Gallus gallus\_MAPKBP1

CVVVLFNPRKNKQHHLNLSRKTITLAFSPDGKYLVTGESGHMPAVRVWDVAERTQVAE  
LQEYKGIACVAFSPSSKYIVSVGYQHDMIVNVVSWKKNIVVAANKVSSKVTAVSFSEDC  
SYFVTAGNRHIKFWYLLDDSKTSKVNATVPLLGRSGLLGELRNNFFADVACGRGKKADSTF  
CITSSGLLCEFNKRLLDKWVELRNTDSFTLTAHAHSYIHDLIFCGGEGHSINLAIITLL  
HIFACLPRRGCLSSVSHLIRLFSGTTDAKYPDTIALTFDPTNQWLSVCYNDHSLYVWDVK  
DPKVGKVVYALYHSSCVWNVEMYPEVKDSNQSCLPPGSFITCSSDNTIRLWNTESNIH  
GTALHRNLSNDLMKIIYVDDNTQVLLDTDYNSGGSTDKADTQVMDTKVGIKRTVSPSG  
EHLASGDRIGTLRIYELQSLQEMLKVEAHDSEILCLEYSKPDGLKLLASASRDRLIHVLD  
DAGKDYSLQOTLDEHSSSITSVKFAANDGKVRMISCGADKSIYFRTAQKTGEGVQFTRTH  
HIVRKTTLYDMDVDPVSWKYAAIGCQDRNIRVFNISSGKQKLYKGSQGEDGTLIKVQTD  
SGLYIATSCSDKNLSIFDFYSGECVATMYGHSEIVTGMKFSNDCKHLISVSGDSCIFIWR  
LSSEMTINMRQLSDMKQRGKQAEKSPPHKTAGLMRHESISALSSVPALSSDSDKDGEDE  
GNDEAFDGGPHSGKCSGICLFPDPDLTLRSLSHWEMRRAKEIAAIQRSEAPMSKVPR  
QRGRWSQPTNNIEMTVKMSMLDLRQLESFVSRSPSRDLSQNSNGDDREEQADLP  
THINKVGSSIAQDNRSCVRPQVIRLLSCEEGIFSQELEPSESEECVIYPEQDEIHPTDPRSEFQ  
VKALPHGKLNRSYQNGCPDKHSPDSACSVDYSSSRLSSPDHPNEDSESTEPLSVDG  
ISDLEGEEGEEDVGTSPVGEIPQAPDQEKFLKQHFGLGSTDGKGTALWLSLERTENLS  
ISSRFLSQSPALRRLSLSSSNLILDSKSIESPAPTSRFTQDLLKNDSSHPADALENSHLLN  
NVNLHQAVYAQKKRKSALETS RVGMAPGRVIASFPEGPVNAVMRKAQSVHDLVHEVNSMELSV

STKSPLRALSSSLLKMDGSGALLAKDVRAAKPKSYMNPTTSFRAKMSRSISVGENLYLGY  
STDVLTGRTSPPVKLASSNRAHLILDIPKPLPDRPTLASFSPTTKTKLLEPQSPQSPA  
GACKKENSTGLAKESPVESPI SRTGCQFEPGVTNLKLREFSEVRQLKSPESTLPRYP  
RSPTSVTALAQVSESSISVEQCEHVSELQDSMRKAIHLYRAVLNDTESSTDKDKIAGLL  
TETFSLMKKELDSLKSLNDKCGANLPSPKSLGDEQTLALLEQYSELLLQAVERRMDKKL

>Taeniopygia guttata\_MAPKBP1

VTLEKVLGITVSGGRGLACDPRTGLVAYPAGCVVVLFNPRKNKQHHILNSSRKTITALAF  
SPDGKYLVTGESGHMPAVRVWDVAERTQVAELQEHKYGVACVAFSPSSKYIVSVGYQHDM  
IVNVWSWKKNI VVAANKVSSKVTAVSFSEDCSYFVTAGNRHIKFWYLDDSKTSKVNATVP  
LLGRSGLLGELRNNFFADVACGRGKKADSTFCITSSGLLCEFNEKRLLDKWVLRRTTVAN  
CISVNHDYIFCGCADGTVRIFNPTLHFVTTLPKPHFLGTDIASVTEASRLFSGVADAKYP  
DTIALTFDPTNQWLSVYNDHSLYVWDVKDPKKVGKVYSALYHSSCVWNIEMYPEVKDNN  
QPCLPPGSFITCSSDNTIRLWNTESSNIHGTAHNRNLSNDLMKIIYVDDNTQVLLDTDY  
NSAGSADKADAQVIDTKVGIRTVCVSPSGEHLASGDRIGTLRIYELQSLKEMLKVEAHD  
EILCLEYSKPDTGLKLLASASRDRLIHVLDAGKDYSLQQTLDHSSSITAVKFAANDGKV  
RMISCGADKSIYFRTAQKTGEGVQFTRTHHIVRKTTLYDMDVDPWKYAAIGCQDRNIRV  
FNISGKQKKLYKGSQGEDGTLIKVQTDPSGLYIATSCSDKNLSIFDFYSGECVATMYGH  
SEIVTGMKFSNDCKHLISVSGDSCIFIWRLSSEMTINMRQRLSDMKQRGKQAEKSPPHKT  
AGLMRHESISALSSVPALSSSDSDKGEDEGDEDEDENAVVKLAISEKACVDCDPDLT  
LSQWEMRRAKELAAIQRSEAPMSKMPRQRSRWSQPTSSIEMTVKSMMLDLRQLESFVS  
PSRDSLSQNSNGDDREEHTDLPVHINKVGSSIPPQDNGSCVRPQVIRLVSFASRLLMNGL  
THCSVHDGRGAPRKS DSPFGTSEIFQVKALPHGKLCRGYHNSGCPDKHSPDSACSV  
DYSSSRLSSPDQPNEDSEGTEPLSVGDVSDLEGEEGEEDVGTSPVEGEVPPQIPDQEK  
FLKEHFGTLSNTDGGKSGSCRNLERTETLSISSRFLSQSPALRRLSLSSSNLTLDSKPI  
EPPTQTKSGISIEQCEHVSELQDSMRRALHLYRRVLNDMESSTDKDKIAGLLTETFSS  
MKKELDSLKD AEERPKDKEALSLGDEQTLALLEQYSELLLQAVERRMDKKL

>Anolis carolinensis\_MAPKBP1

CVVVLFNPRKNKQHHILNSSRKTITALAFSPDGKYLVTGESGHMPAVRVWDVAERTQVAE  
LQEHKYGVACVAFSPSSKYIVSVGYQHDMIVNVWSWKKNI VVAANKVSSKVTAVSFSEDC  
SYFVTAGNRHIKFWYLDDSKTSKVNATVPLLGRSGLLGELRNNFFTDVACGRGKKADSTF  
CITSSGLLCEFNEKRLLDKWVLRNTDSFTTTTVANCISVNHDYIFCGCADGTVRIFNPSN  
LHFVTTLPKPHFLGTDIASVTEASRLFSNVTDKYPDTIALTFDPNNQWLSVYNDHSLY  
VWDVKDPKKVGKVYSALYHSSCVWNI EYVPEVKDNNQSCLPNSFITCSSDNTIRLWNTE  
SSNIHGTAHNRNLSNDLMKIIYVDENTQALLDTEYNTAGGVDKADSQILDKAVGIRTVC  
VSPTGEHLASGDRIGTLRIYELKSMKEMLKVEAHDSEILCLEYSKPETGLKLLASASRDR  
LIHVLDAGRDISLQQTLDHSSSITAVKFAANDGKVRMISCGADKSIYFRTAQKTS  
DGVHFTTRTHHVVRKTTLYDMDVNPVNWYAAIGCQDRNIRIFNISGKQKKLYKGSQ  
SEDGTLIKVQTDPSGLYIATSCSDKNLSIFDFYSGECVATMYGHSEIVTGMMSNDCK  
HLISVSGDSCIFIWRLSSEMTINMRQRLADMKQRGKQAEKAQPGKTTGLTRHESASAL  
SSIPPLSSSDK EGEDEGNEEDELQGLQSFQMOTKCNAERDSDLFSRSLSHWEMRRAKEM  
AMIECSEATMSKAPRQRSRWSQPTSTIEMTVKSMMLDLRQLESFVSRSASHDSLQTS  
SNGDDQEERPDPLHANNVGSSSAPQENQPCVRPQVIRLVSCGGIFPQELEPSESEECV  
IYPEQDEMHPDISSEFQVKALPHGKLCRGYHNSGCPDKHSPDSACSM DYSSSRLSSPNE  
VSTLDSESTEPLSV DGTSDLDEQVGEDEEDVSPGHLEGNAPRTPDQEKFLKQHFETL  
AGDKIPGGPYRTLERTENSISSRFLSQSPALRQLSLSSSNLILDRKPSSEGLAWSRHV  
SPGLVKNGIDGQNSAIENGIFQNDVHSFRSLYMQRKRKPFLEISRAGRPVRTFPD  
TDGELVMRKSQSVHDLVHNGEKDPRPNNYRPLSTLLKMDGNSLQAKDSKTTKPKSYMS  
PTTSFMAKMSRSISVGENLCFGD SSENLTVEVKVSPQGKLASNRGHLILDIPKPLPDR  
PTLASFSPTARSKTLLSESPQSPAGVGRKKCLFTEEWPSKLEIQASVPKASPASPSTHTL  
KENQMSLRKTKVQPESPGPNSRPKPS ELRSPTALGAIQDSGSSISVEHCRHVSELQDS  
MRKAIHLYHMVSADMGT SAKDEIAGLLTDTFSVMKKELDSLNEGSGSALSSPRHFG  
DEQTLALLEQYSELLLQAVERRMDKKL

>Pelodiscus sinensis\_MAPKBP1

MMSVEGSTITSRIKNLLRSPSIKLRKPRNKREDISNKVTTLEKVLGITVSGGRGLACDP  
RTGLVAYPAGCVVVLFNPRKNKQHHIVNSSRKTITALAFSPDGKYLVTGESGHMPAVRVW

DVAERTQVAELQEHKYGVACVAFSPSSKYIVSVGYQHDMIVNVVSWKKNIVVAANKVSSK  
VTAVSFSEDCSYFVTAGNRHIKFWYLDDSKTSKVNATVPLLGRSGLLGELRNNFFTDVAC  
GRGKKADSTFCITSSGLLCEFNEKRLLDKWVELRTTVANCISVNHDYIFCGCADGTVRIF  
NPLNLHFVTTLPKPHFLGMDIASVTEASRLFSGVADAKYPDTIALTFDPTNQWLSVYND  
HSLYVWDVKDPKVKGVYSALYHSSCVWSVEVYPEVKDSNQSCLPPTSFFTCSSDNTIRL  
WNTSSNIHGTVLHQNILSHDLMKIIVYVDGNTQALLDTDYNSGGNTDKADAQALDTKVGI  
RTLCSVPNGEHLASGDRIGTLRIHELQSLREMLKVEAHDSEILCLEYSKSDTGLKLLASA  
SRDRLIHVLDAGKEYSLQOTLDEHSSITAVKFAANDGKVRMISCGADKSVYFRTAQKTG  
EGVRFTRTHHVVRKTTLYDMDVDPWSKYAAIGCQDRNIRIFNISSGKQKKLYKGSQGEDG  
TLIKVQTDPSGLYIATSCSDKNLSIFDFYSGECVATMYGHSEIVTGMKFSNDCKHLISVS  
GDSCIFIWRLSSEMTISMRQLADMQRGKQVEKSPPHKTAGLVRHESISVLSPPVPLSS  
DSDKDGEDEGNDEDELNGLQSFQIQSTCNERDLGINGKDPDLSLSRSLSHWEMRRAKED  
AEIQRSETAVNKMPRQRGRWSQPSSNIEMTVKSMLDLRQLESFVSRSPSRDLSQTSNG  
DDREEHADLSLHIGKVGDSLAPQESRPCIRPQMIRLVSCEEGVFTQELEPFSEECVIYP  
DQDEIHPTDTSSEFQVKALLHGKLGSRSYHINGCPDKHSPDSACSVDYSSRSLSPDHPNE  
DSESTEPLSVDGASDLEEQADGEDEEDAGTSMVEGEVPKTPDQEKFLKQHFETLANSSEK  
GGSCRTLEKTENISISSRFLSQSPSLRRLSRSLSNPILDQKSIGASAQSKQVSPDLLKNG  
NSLESPVSALFL

>Xenopus tropicalis\_MAPKBP1

QVTLEKVLGITVTAGRGLSCDPKTGLVAYPAGCVVLLNPRKNKQQHILNSSRKTITALA  
FSPDGKFLVTGESGHMPAVRVWDVAERTQVAELQEHKYGVACVAFSPTSKYIVSVGYQHD  
MIVNVVSWKKNVVAANKVSSKVTAVSFSEDCSYFVTAGNRHVKFWYLDEAKSSKVNSTI  
PLLGRSGLLGELRNNFFTDVACGKGGKSNSTFCITSSGLLCEFNDQRLLDKWVELRVSSI  
ITTVANCILVNHEYIFCGCADGTVRIFNPNLHFLSTMPKPHCLGVDIATVTETSRLFSS  
AADAKYPDTIAMTFDPTNQWLSVYNDHSLYVWDVKDLKVKGVYSALYHSSCVWSVEIY  
PEIKDSNQACLPPNSFITCSSDSTIRLWNMETSNIHGTAHNRNLSNDLMKIVLIDDNTQ  
ALLDTEYNSAGLDKVDHQGLDTKVGIRSVCVSPNGQHLASGDRTGTLRVHELQTVTELL  
KVEAHDSEILCLEYSKPDGTGFNLLASASRDRLIHVLDAAKDYSLQOTLDDHSSSITAVKF  
AANDGKVRMISCGADKSIYFRTADKVGDAAVHFTRTHHIVRKTTLYDMDVDPKLYAAIG  
CQDRNIRIFNISSGKQKKLYKGSQSEDGTLIKVQTDPSGLYIATSCSDKNLSIFDFYSGE  
CVATMFGHSEIVTGMKFTNDCKHLISVSGDSCIFIWRLSSEMTINMRQLAEVRQRGKQV  
EMSAPHKTPNASRRETIAMVSTAPAMSSSDSKEGVEDGSDEDMAVISFSLHITRSDKTSS  
ASSSFGRSLSYWEMKRVSVLSLLQISDCLSKMPQRVRWSQPAGNIEMTVKSMLDLRQL  
DSFAPSDDVIGFQPSSEGLGMEFVDTDNPRSQAPFGPIGNRSRPRVIRLMSCEETMFKQDV  
DTPEGKECTIFPETEEDESLDRCSIFEVKGPLRSYHDNVCQEKHSPDSACSVDYSSRSL  
SPEHPNEDSESTEPLSVDANSDDLQVEAEDLEPNSPLMDGEIPQTPDQEKFLKRHFGN  
LSTGNFPDGPLLTSERNDFSSISSRFLAKAQPPALGYRCQDPFRPYNQLLCARARSAKHV  
AATFVSPSSRHQSIEPSVPDSEFSPALFQPSQELPTLINGTDHQPKSAIMLDHDFASPQK  
CKGGPFSSLMQIRKTSVHDLVHEAEREKAIRRRTLPSNLIKVENITSGTPHAKDGKSA  
KGRSYMNPTTSSMAKISRSMSVGENETVIKPHLQPVNTCSSTKTFQAKNRAHLTLDIK  
PLPDRPLLSFNKGGQLEMESPRSPANCKVKNSFTELTCRNENHSSGAVEKISPSSEYD  
CAPSHLSPSSLWPIPLSPRFISQAQNVMEMSCKGHISSQEGSSSVSFEQCELIASELQDS  
LRKALSLSYRSVTTADPSTNLERCKIAGLLTETFGMVKRELDLFLKEGNGSPGTEHTTHRLG  
DDKTLALLQQYSELLLQAVEKRMDKKL

>Latimeria chalumnae\_MAPKBP1

AVLVVLVPHSNSGEEHVFSVLRKTITALAFSPDGKYLVTGESGHMPAVRVWDVAERSQVA  
ELQEHKYGVACVAFSPNAKYIVSVGYQHDMIVNVVWAWKKNIVVAANKVSSKVTAVSFSES  
STYFVTAGNRHVKFWYLGDTKTSKVNATVPLLGRSGLLGDLRNNFFSDVACGRGKKADST  
FCITSSGLLCEFSEKRLLDKWVELRNVSFTTTLANCISVNEDFIFCGCADGTVRIFNPF  
NLHFISTMPKPHYLGMEDIAAVTEPNLLFASKVDAKYPDTIAVTFDPANRWLSVYSDHSL  
YVWDVKDSKIKGVYSALYHASCVWSIEVYPEVKDCNRVCLPPGSFITCSSDNTVRLWNT  
DGCNIHGTVLHRNIISSDLMKIVYMDNNTQTLLEDLEYSSPGSVEKTDQAAADTKTGIRTL  
CVSPDGQHLASGDRTGTLRVHELRLFLGELRVEAHDSEILCLEYSQPETGLNLLASASRD  
RLIHVLDAGNDYSLQOTLDEHSSSITAVKFAANDGKVRMISCGADKSVYFRTGEEKSPEGI  
QFTRTHHIVRKTTLYDMDVDSTRKYAAVGCQDRSIRIFNISNGKQKKLYKGSQGEDGTLI

KVQTDPSGLYIATSCSDKNLSVFNFYSGECVATMFGHSEIVTGMKFSNDCKHLISVSGDS  
CIFIWRLSSEMTINMRQLAEMKQKQTEKSPPRKPSLIRRETYNIPSPAAAMSSDSE  
KEADEDGNEEEESPTLKKKKKKKKKKI PAHHAEEVEYSRKVPTWDVKKVDEVSSVKGSDTA  
LNAKPRQRGRWSHRLSSIELTVKSMMLDLRQLETFTRSRSASGDSLSQSSVFGDAGEPEEP  
DRSSLQTLVEDSYSSYKESKPRSRPQNIRLPPRQDGGFPRQVETPQKEERVIYLQPADYN  
RSHMESQTDSTPPQSMPTPEYEVKLLQPGKVGKGYRGNPCDKHSPDSACSVDYSSSRL  
SSPEHRNEVSPLHTRVEMPNLRYCCLAI SFPLLCWRGQGGGDTHHTHTTRTTKADFVLFW  
ISPFTDLPGRTOQGCEPLSMSSRFLARSQSPVVSACPKPEWKPASQCP SWSRDRQDAHPF  
QAHLCEKAEPYPGEQAHFDRKKNQTA CLTKRYQSLSGNCF SLETNLATVGSQSSLPMAE  
KEQRANPRRTL PSTPLRPDQSPSPVAKEGLQTKAMKQRSYMNPTTSSMAKVSRSVSMGEN  
LNFSDSSEHNTSLPNLSAKPGASSKPHLTLEIPKHL PDRPSLVFSPTAKPKTHFEVGA  
PRSPIGVAKRKPSFPDGRPCQGDKVSTPIQEKMLLLQPQGCFAQELS YTCLNDYPLRGLT  
RGIAPLPLDVPFSCSKKKIPISQHLVKRPAVGVEDCKAVAAELQDSLQKALDLYKAVTSA  
GAASLENTQIAGILTESFSHIRKELDTLDCSKMAERTPQQQEVDLSPSPLRDSRTLELLE  
QYSELLLQAVERMNRKL

>Takifugu rubripes\_MAPKBP1

EMTAEGSGTIRSRIKNLLRSPSIKLRRRSGNARHKEDRGDKIHLEKVLGITAPGNRALAC  
DPQTGLLAYPAGCVVLLNPNQKNKQHHIFNSSRKAITTLAFSPDGKYVVTGESGHMPAVR  
VWDVSERLQVSELLEHKGIVACVAFSPNGKYIVSVGYQHDMMVNVWNWKNVLAANKVS  
SKVSAVSFSNDSSYFVTAGNRHVKFWYLDHAKTSKVNSTVPLLGRSGLLGELRNNFFSDV  
VCGRGKQASATFCITSSGLL CVFNDRLLDKWVELRTVDAASVSQATCLSITDDLIFCGC  
SDGTVRAFSPVDLHFRCTLPRPHSLGTDVASMVDASQLFSCKPGSRYPDTVAVTYDPAHR  
WLSCIYSDHSIYVWDIGDVSLLRRVGLYSALYHSSCVWNVEVYPEGGGGAGRGAGPGSF  
LSCSSDSTIRLWNLGSHNTINRNVLSHDLQEVIIYVDDINCLLDADCTAVCGGSSEKAGPT  
DGQQADQSKAGLRTL RVSPDGQHLASGDRVGLRIHSLDTMEEILNVQAHDSEILCLEYS  
KPDTGLQLLATASRDRLIHVLDAGR DYSLVQTLDEHSSITSVRFTTNEGKVRMISCGAD  
KSVYFRTAEQTDEGLEFTRTHHVVRKTTLYDMDVEPTRKYAAVGCQDRSIRIFNISNGKQ  
KKFYKSGQGEDGTLIKCVI DP SGLFIATSCSDKNISIFDFYSGECVATMFGHSEIVTGMK  
FSSDCRHLITVSGDSCIFVWRLSPQLTIRMRQLADLRLNLSQNAQQNLVTLR PVCADV  
MVLTRTRSRDASSPRVVTLSSNSDKEEEEDQNKVTLPTTPRSVNATCCVQGVWFHQLFL  
LCFKKALLTSSSLSLGGLLQEQVGARTPRRRWSK DAGSEDDLMMVKSMMLDLRMLSEYCFD  
VKASLTDHLLTVPPPQVKTSPTSSTSSCPKGVSPVPELTDKGT TTNHRPNYIRLSSQTPD  
EEKPVLYPDQWEDTVILVERTPPLPVSEFQVKEACPAADGQDKPSPDSGCSLGFNSSLS  
SPVQPGELSTTEPSSADGNSSGLEEDEEEMGRGAEAVVLQTPDQEAFLKEHFVTLAEL  
SNPGSPSRASQSSSDNLSISSRFFTQSQT LAARGTGGSEEKVQSEISELQPQMMNQDLLH  
DQPKHNQTSKGQTQPPEAPQNPPLKRVQMAADSERNOGNPSELRKTQRVPSLAPPS  
SAPHDPPLLSKTTPIVIFQPPPEASSCIAKVPPAGTPPAHVVPRSYMSPTTSSKAKMSRSV  
SVGEGIHLEPTEDPSVAPCSQVKETLPAAI AVVPSSAAVATPPHAALATPPHA AVATPP  
HAAVAPVVVTLSSPLSSQGNQAVPPTRTLHTRVP GGSRPLPDKPSLSSFSRPPSPV  
LSTPPPQEDETPAEPGVDSVVSADEPISVETCRALTNDLQRCFRRATHLYRKVSASSGDD  
SSANQNQMAVILSEAFQAMRVELNGLPLGPPSMMGELGESKMTALLEEYSLLLLQAVERR  
LDAPL

>Oryzias latipes\_MAPKBP1

ASRSGDAGRTCAMSADGATIRSRIKNLLRSPSIKLRSGARHKRDL SNKVTLEKVLGITA  
EGNRALACEPRTGLLAYPAGCVVLLNPRKNKQHHIFNSSRKAITTLAFSPDGKYVVTGE  
SGHMPAVRVWDVSERLQVSELQEHKGIVACVAFSPNGKYIISVGYEHDMMVNVWNWKNV  
VVAANKVSSKVTAVSFSDDSSYFVTAGNRHVKFWYLDHNTSKVNATVPLLGRSGLLGEL  
RNNFFSDVACGRRRSSSTFCITSSGLLCEFNERRLLDKWVELRVSDRSETS QATCLSVT  
EEFIFCGCSDGTVRAFSPVNLHFLCTLPRPHSLGADIASMVDASQLFSCGADARYPDSVA  
VTYDPTNHWSLVYNDHSVYVWDVRDLQDLRRAGKLYSALYHSSCVWSLEVSTGGTGEGE  
RLLPPGSFLSCSSDNTIRLWNMDGHSALHRNLSHDLKVIYVEDNVSSLPDADSITVAG  
GNAEKAGPPEGQOTDQIRTGIRALRVSPDGRHLASGDRMGVLR IHDLDSMEEILNVQAHD  
SEILCLEFSKPD TGLQLLATASRDRLIHILDAGR DYSLVQTLDEHSSITAVRFAANEGK  
VRMISCGADKSVYFRSAQQT EEGLEFIRTHHVVRKTTLYDMDVEPTRKYAAVGCQDRNIR  
IFNVSNAKQKKAYKGSQGEDGTIIKVHIDPSGLYIATSCSDKNISIFDFFSGECVATMFG

HSEIITGLKFSGDCKHLITVSGDSCIFVWRLSPEM TIRMRQLADLKPRRSVPHRQNAPO  
QRAVKVSRTPPPCVDMMSSSDSNGEEEEEEEQPRPYMETAGCVKEADFLAMLGHVTDLRLLL  
VCFPQRCSAETTGRTPQEDSTAQLPRRRWSRRTSSADSVLMVKSMFDLRMLDSASPDIHG  
DQEEGKTRPHPDFGLKRRTPAVEPKLHRASEDLQSTTSLQVASAWVRHLQASESEDSSQQ  
EVGTQEKNPKDSGRYFREKFETPPVSEFQVKEACPTEGGQQEKPSPDSGCSLGFSSALS  
SPERPAGDDTEPTEPLSEGDGNSSELEMEMEEVVGQRREGAGGSQNVQPOTPDQEAFLKEN  
FVTLADPSASGSPSRTSNSSSELSISSRFLHQSSAARRNDGKALGNQNDQPPQTQKDQP  
PLVQVQNPQNQQGPDLPQQQQGAPEETSSGHPCFRSATS KKKKVQTEVEPRRNMVLP TPSHQ  
NPGLHKAQSVNSLLADAGETSSFRLLSSPGELSDPESA AVTLRKSSSSSAAVAAPRSYMSP  
TASSMAKIAKEAPPTNAVGN SAALPATPPHAAVLPVVVSPSSSAAGNHG NRAGPPRSL  
QARVSGSSKPLPDKPSLDVFS PPTK

>Tetraodon nigroviridis\_MAPKBP1

MVVVSFLQNLFFVVSSNKVSSKVTFGSFSSEDSSYFGNRHV KFWYLDHASKASKPAPRSLCS  
PGQGCWGELRNNFFCDFACGRGSTSGSTFCITSSGLLCEIN SKRMLDKWVDLQTSAAHSL  
SLSEDTIFCGCADGAVHVFAVDLQFACTLPRPHSLGSDAAAVTETS PFFSTKTGTRYPD  
AIAMTFDPVNHWSLSCGYNDHSLYVWDIRDVNRVGVKVAALYHASC VWDLEMFPELPDEVG  
SGLSSGVFLSCSADNTIRVWRMDEWTRSQNLLSTDLQNI IYIDGSATALLDPESLANINP  
EKPGDAQMAETRTGIRTI CLSPDGKHLASGDRNGILRVHSLSSMEE I LKVDAHDAEILCL  
EYSKPETGLKLLATASRDRLIHVLDANNDYGLVQTLDEHSSS ITAVRFAACENNVRMISC  
GADKSIYFRTAHKTRDGTFRFRSHHMVRKTTLYDMGVDPTCKYAAVGCQDRCIRIFNINS  
GKQKLYKGSLEDGSLIRVQLDPSGQYVATSCSDKNISIFEFNTGECVATMLNEIVTGM  
KFTNDCKYLI SASGDSCIFVWRLAPELTIRMRERLWRLRRGPDPPAGATSALR

>Gasterosteus aculeatus\_MAPKBP1

PPPQSHPNDPSSPPHRMAGDGATIKSRIRNLLLRSPSAKQRKSRESLGRQVTLEKVLGI  
TASGNSGLTCDPRSGLVAYPAGCVVLLNPKKKRQH HIINTSRKTIITSLSFSPDGKYLVT  
GESGHLPAVRLWDVEERRQVAELHEHKYGVSCVAFSPNSKFI VSVGNQHDMMVTVWVWKK  
DVVVAANKVSSKVTGVSFSEDSSYFVTAGNRHV KFWYLDHCLASKASAPVPLLGRSGLLG  
ELRNNFFCDVACGRGSTSDSTFCITSSGLLCEFN GERMLDKWVDLRRRVDLVQTSAAQSL  
SLSEDTIFCGCADGTVRAFSSADLHFACTLPRPHPLGTDVA AVTEPGHLFSKACGRYPD  
VVAVTFDPVSQWLSCVYDDHSLYVWDVSDVNRVGVKVSALFHAASVGDLEMFDPVPGESG  
LSTGAFLSCSADNTIRLWRSDDRTRAPFRSRNILSSDLLNI IYVDGNTGALQDPECWTNM  
NADKQGDGQTAESRTGIRTI CVSPDGRHLASGDRSGTLRVHDLRSLAE I LKVESHDAEIL  
CLQFSKPETGVKLLATAGRDRLIHVLD AEDDYALLQTLDEHSATVTAVRFAATDNKVRLI  
SCGADKSIYFRTALKTERGTEFRFRSHHMVRKSTPCDMDVDPTCKYAAVGCQDRCINCRVF  
NISSGKQKKIYKGSLEDGSLKVTVASI I SPRRFLITSGQYVATSCSDKNISILFHTG  
ECVATMDGHSEIVTGMKFTND CQHLSVSGDSCIFVWRLAPELTARMSERLSELLQHPNA  
PPCRAAGLRWRSEGVSRREAHDAPTPGGPPSSDSDLEREEDGAEDDDPEDAAADASSDSSS  
SSRGEEAVQVLTWVEFKTRSHRASVTQDPPDSSKRPRRRWSHRMAPLELMVKSMLDLRQ  
LETFAPKKRPRERQSTSSLQEAARASGGATTETCCTPRRASATRVSRAGKSPAQR TCFHS  
GNKRAFLFSVSVRPRPSLSPHPLSHFSYASYTVKEQRCRTRASRRESKESRSPDSARS L  
GYGSRDSSPERPPRAHDCADVESLSPGSSDEEPDEGEEDERGA EVTSLDRALRTVTETAD  
DGEEDFLKHN FETPNESCSTGPPMQTTLIGLSVLS SSSLLFATASYFPFCFSSPALDVCP  
QPSRAAKAPGKEPCSRSAKPPVSKVRPLMEDNRS GNPADRVVPVSPGRVEGPKNKCPVCS  
SPALHSPVTSSDRREPRRRPQQLSLFHDAPHSFHFSSPSNGSSQSPDSPLPWESP KLRP  
HSYMNPTASSMAKSSRSTSLGDV IQPGSPPCSPLFHRGRRSSVEPEVEPPSLSSRPALSS  
PPRTPPRPPAAVSPSPNRPSPRIPLPKQQLSPRRSLCLEEMASSQVRLPCSTCPSLPSPP  
SVTGPSPSVIKRVSLGPPTRTTWVSPQSLQGLSLSLSLPADPSITLET CRQAVTELNSL  
KKTAMFYSTVLQSDRRLGEDQ QEMRSILSEALVAVKAELDSLPHPARVDPGVKGE GENTR  
ALLEQYAE LLLRSVERRLESKT

>Denio rerio\_MAPKBP1

MTVENTTIKSRIKNLLRSPSIKLRRSKAGNNKENLSNKVTLEKVLGITSAGSRALACDPH  
SGLIAYPAGCVVLLNPKKNKQH HIINSSRKTITTVSFS PDGKYVVTGESGHMPAVRVWD  
VAERTQVAELQE HKYGVACVFSFSPNSKYIVSVGYQHDMIVNVWAWKKNVVAANKVSSKV  
TAVSFDSSSYFVTAGNRHV KFWYLDHTKSSKVNATVPLSGRSGLLGELRNNFFSDVACG

KGRKASSTFCITTSGLLCEFNDKRMLDKWVELRTSMATSLVCELDLIFCGCADGTVRAFT  
PTDLHFICTLPHPHSLGTDIATLTEASHLFSYKQNVRYPDAAVAVSYDPSSRWLSCVYNDH  
SLYVWDVDRDLRKVGKVYSALYHSSCVWSVEVYPERDGEQPRLSPGSFLSCSSDNTIRLW  
HTDAQNTSLSRNVI SNDLQKIIYMDSNTSTLLDCTISSNSEKVDPQTSNRTGIRTM  
VSPDGLHLASGDRNGTLRIHDLESMEEILDVQAHDSEILCLEYSKPETGLKLLATASRDR  
LIHILDADKEYSLLQTLDEHSSSITAVRFAANEGKVRMISCGADKSIYFRTAQKTEEGTA  
FTRTHHIVRKTTLTYDMDIDPTRKYAVIGCQDRSIRIFNIGNGKQKKVYKGSQGEDGTVIK  
VQTDPSGLYVATSCSDKNISIFDFYTGECVATMFGHSEVVTGMKFTNDCRHLITVSGDSC  
IFVWRLSPELTINMRQLSDLKQNSRPVQKTPPNKQHTLSARKEIHSAPVIGTMSSDSDK  
DVEEEEGIEEEDEMFPHLSSGSSAGEDTGSSEEKHNLSNLSHMKKQSSSSEHESSGSRPRR  
RWSRRMGSIDLKVKSMMLDLRQLESFAMPLFPSKSHDAPKNPPAPKNQDLGSTISLQTLAA  
WMPEENGQTRPHYIQLPPQTPETEVLYPEGCEQSSLAGRWVSLGTNLHYLKALSTQITF  
E

>Branchiostoma floridae\_XP\_2613182

VTLERVLGLTLTNNCLGLASSPVTGVIAYPAGCVVVLFNKKNKQSHIFNTSRKTISALAF  
SKDGKYYVVTGESGHQPGVRVWDVEEKTQVAEFQGHKFGVSCVAFSSNMKYVVSQYQDM  
LVNVWNWRTSTLVAASNKVSQKAMSFSEDSSYFVTVGNRHVKFWYLDESKASKNLGTVP  
LLGRSGILGEQRNFFCDVACGRGMMKESTYCI TRSGLLCEFNERLLDKWVELRTTCAN  
CISVSENHIIACGCADGVVRLFDPKTLHYICTLPHYLGLDVAASIDPSQFITKNDNAKY  
PSTIAVKYDEQNNKVTQVYDDHSLYVWDVKDEKKIGKAWSFYHSSCVWGVETYPNVPEG  
FKAALPAGSFITCGSDDTIRIWNLDSTLHTDTVLKRNIIYSNELLKVIYTDSEYQNI RDVD  
YNPGKSSSTVTIYGGKNGVRCVKVSPDGQHLASGDRCGNIRVHELQFMDQLKYLEAHDGE  
VLCLEYANPDQTLNLLASSSRDLIHFQADRNYSLQTLDDHSAITAVKFTDHNGQL  
QMLSCGADKALMFRSLQOQPTNTNTDMQFIRNHYILGKCTFYDMDVDITKKYVATACQDR  
NVRIFNTNSGKLLKKGYSGLGDDGTLIKVQLDPSGMAYVTSVSDKNLSIYDFYSGECVAT  
MFGHSELVTVGKFTPLKRLISTSGDGCIFVWKLSPVFTQTMKDRLAELGQQLPTDVPKI  
NIRSGKSSWLRT

>Saccoglossus kowalwvskii\_XP\_2734815

MYRPKPGETEEDLLRFQEEFLRKQNVSSAKLTKNSDNKGEPTKNPDPKTTTLKRDRVVKLD  
DSSTVSPGDVPRKSKFKSSQRESNVSSSSQRYVFDLDGNNHDMHKEMDQRDSHITSV  
LSDIIERDIRDVPVYLPRAMNQAFPSAFHRGKQDDKRLKDVPEKKRPSLFAQHFSRTKPS  
EFGMISEMKQVEVPNVTSKIHSKTIDNVRNIAKNPESNESGQEEKMEVEENAVGQMASLP  
VTPLVITGEGLDQVESSKEAIIHKENLTKLSEMPEAEILAEQKQLKSMLDPNIVAFLAS  
KKQKTTSSPSMDTSNAETTAKIPHGNEQVVEQTMSSPKSGTSPITSRKGWVHMDTVEKEK  
LEWMQEVKPKTGEKKIGVQARFNLHGVI IARDSDI SMREGLHHHGEEPEVPGYTLEEMF  
QLCRSAALNQRILSLQILAKVLYNYRLDRLGGDLQVALIPHLLDAGLIFILRQSLDDTSE  
VGIAAAVDAFKSVLIQPADEECLDKVYGYRGCEVHPLFLSKEEDEDDEDADSNKKEKHE  
IEILEQDVIKGLLKMFLERLRYILEICRPDPTVINILLIRLARHSPEASHEIMKCP  
RLMSTIFTMFLPTTWTPTDRSII DDVYGFVPHAMKLVRLVLCMAGRNI AAILSRYNLMS  
VIIRYITQEPTDMQLHVGEAFMLSIESLPQEDVNERKPTIPVPAIDWSHVTGFIAPIELC  
YHRWITEISRTDEPLSDQGLMLAASCINAMSAFYIKITQOTSYNAPDVLQHIETIVDKTV  
LPFMKSGNFYNYVINLRTYSSYKINDEDRPRKTGCASLPDLSGHPLDDNRHPCIQNGSPY  
PFMISYLRLIYTWAKMHKGIAAKFAGTIESSYVITYLERTCENSRLVGDTLDRCYSRYE  
IVLYLVKLYQLVAEQTESCRRYSKLYHSVALLLFTSLHSGDEHLAHLDMSTVLFHTHYL  
VEGRIGDPEAIELAELLRVSDTERTNTCDTMRKREPNRGVLLRDSYNLPSIRACYMSS  
FGGMTQTIASRNLFVTIPEIETFILPEFSGSLVPLDWMYLLPLHFYVQASKNELLGQP  
VENLPSQFVNGVTNTRMIYMLETWRPESVNHISMSAKITRLMCFVLTGNDLFLEDTVHC  
YLLALLKLYFQPSYLDRLNLSPIPGVASFYDFYMFVVQYGGVSFGDSL FAFMLLPLQ  
QRYNIEFRKAIWGEHQHVIRAITLKIDECLLPMHRYLTPQESHVELLQLYLSALVSNVVK  
STWSPVLYLIAVCHVNGFLFSRHDNDQOEMMKRQFIMLKQVLRIQNQVCDRMFNPRKNKQ  
THIFNHSRKTITALLSPDGKYVVTGESGHMPAVRVWDVAERSQVGEFAGHKFGISCVAF  
SPNLKHVSVSGSQHDMVVNVWDWKTGIRAASNKISCKVTAICFNETGNCFVTVGTRNVRF  
WYTSSKKSREAVPLHGRSGILGEQRNFFCDVACGKGSNKEKTFCITTSGLLCEFDEKRL  
LDKWVELRTPQAHSLSVSEKII FVGCANGVIRIF SADTLHYVSTLPHILGVNVAASMD  
PSHLVKHNDNAKYPAVAALTLDDKNNRLSAVYNDHSLYVWDVVDIKKIGKSWSFYHSAP



VWGIDVYPNIPDGNKSLLPAGSFITCSSDNTIRVWNINEQATSTDGTFKRNI FSELSGHD  
NAKTDAITVEDKKGVRCTCVDHSGQHIAAGDRSGNIHIYDFNFSEEICQIEAHDAEVLCL  
TYSKPETGYVLLASASRDRLIHVFNVKEDYKLMQTLDDHSSSITAVKFTVAYIHTNPDLO  
FIRTHHLNGKTTLYDMSV DATQKFVVAACQDRNLRIYNIASGKQKRCYKGSVSDDGTLIR  
VELDPAGVYATTSCSDKTI CVYDFYAGECVATMLGHSSELVTGIRFTHDSKHLITVSGDGC  
VFVWKLPI MFTHQHMKERMAELGKVQKVEPAYNMLRRGTYTAMPKVI PGMPAPVPD TTDGD  
SVLEQLLSEPFMSSTETLLQEEGSEQTNNVSGEEVLS PNTYSSPSQPKGRWAQRVDAKGF  
RLKSEWEDQNAIQLSMASCMDRRRLTVEPDTLYEQVSQIRLISYDSKLNKSLTGDVCKES  
DVIAEDDIEDEDEEFLPAGLRLPQLEQQLAEDEIASGRVTKSRGSDPFICPFVVRPETDGS  
NNSESPSTPDREVAATLAGALMNLNENSEEDDEKDDKEV I IYLPSEESAKSENGEFCVT  
ENVESMKMYAKRFKKVPRSSSAERKMSLESTESDSTDKMGI I SVDNSDEDEDEERPDTPFE  
EQKDEQTDDEEKEKVFVKNNYENLAEKFEFETNIDQLEVTGNSYMQQLQSGRLSISTRFLT  
RAQQNHLRRLAAAALERDNISSDEASESEDDSLQKRQOEMARAVEETRRRLQEMGYGAGS  
KKKTSPEEKIPGTLRKRSGGICIVSTEPEIQVPAVTL PQDDDSMLSDNKDENELSNVKTQ  
STAGIGAAAAARVVPD TNLNSI INQVDSVTKPESMPTECSAHKPDVKSLPTKIARMLPS  
PSSIASRQASAEIHISSSMPSLETTQSSPPQHIANKENIVDISDQSPRIQRSRSRSESGK  
IGMKDLKAGKFEKSETSSPHTMTLRKRKSKQDSLDRAGTTSNRNRAARRARERHLP  
LPISKSHSAPPVGHVAVPRTRNSFSGETESSQAKRTQSYAAGTKSSLAKINQADSATSSP  
RTLKRSYPLSPEHKDNDSESKTTKDSNDRFVMPPTSTNVVNTKTTSSRRSYSDPKSRNY  
SKARRFPNPKKDSRSLTISDPSSISKLESKATGEGTAVVKPPINGTRDKTQKQTLCL  
AEKSKI SEKCEHMPVIAESKQEI KSPQQLSVEDVTDNIAPLISVTTGLIIEEKAVKSV  
KHDKIKTDTPTNTVKTGISEIQCSNNEPKAEENKSEMATAAPPLTTDVNSPTDSSVSLMTM  
ALCTKTAEELQHVFSKAVQLHSQVLNETYPEQEKQMLQSTFTTMMQETLTNIEPTLT  
NSTPKQSPTSLLTQDEVSKLKTSIALTNGKREDPQVAEAAISLLDQYSDMLVSLVKQKIA  
VDNTPT

>Drosophila melanogaster\_FBpp0305221

MTPASLSASTPTLSTLHHQRMALQSQSQSPLASPLTPSPSSVFGSPKFPANYERSEKIKL  
KKVLGLTVCSNAALDVSPVSGLLAYPAGCTVVLFNKRQTQAYLVNTRSKAFTSVAFSRC  
GRYVATGECGINPAIKVWELET PNGSLEHCSGGSVVAEFVDHKYAVTCVAFSPTGKYLVS  
VGSQHDMIVNVFDWRANLKMASNKISSKVAAVCFSEDGSYFVTVGNRHVKYWYLEGGRKY  
KDPIPLMGRSAILGDLRDNDFCAVACGKGCIAESTYAITRQGHLEVFSSRRLLDKWVQCR  
TTNANCICVNERFILVGAESIIRIFNSATLEYVTTLP RTHYLGV DVAQGIQINHIMSVP  
QQA KFPDCIAMVFDEQRSKVSCVYNDHSLYIWDLRDISRVGKSHSFLYHSTCIWGVETVP  
YNVEREPSQTLPEECFVTCSSDDTIRVWGLDGCTNNDIYRRNIYSKELLKIVYSDELQF  
IKDQGS SLDKAGNSSYDGRNGVRCIKISPELQHLASGDRCGNIRVYSLVNLRLLTIEA  
HESEVLCLEYSNEKIERKLLASASRDRLIHVFDVAQNYLLLQTLDDHSSSITSIKFVGAG  
LNFQMSCGADKSIMFRSFQGNIFMRGTNTSGKTTLYDMEVDSNAKHILTACQDRNVRVY  
GTQNAKQTKTFKGSHSDEGLIKLSLDPGSIYVATSCTDKTLAVYDYYSNECMARMYGHS  
ELVTGLKFTNDCRHLISASGDGCI F IWQVPHDMIVTMQARMSQQLRSGHAPLPRPLAPI  
SPPDGIVLESPTSEIEQPQLQPKFGVAERFSDVGQLPQWAMRKAADSDSGALS IPTPSG  
GSATVPGMHAASSMGNLSSSPSQMTGLAPRARGRWAQRSTQLETADDLRSNSESPLGTV  
SSVGGHSGVNVQTS DYN SASSK DITYNQTYLSESSIDSGMETRRGELKFIGSSNNGTVV  
TVSSVSSIAVSASNGAMSTGSGAAQRLQLPDKRLKPLGRFDTHTHDHDGDVEDISDGER  
TSSDHGMFYNNLAPSTPTDFKVTAMNEDELKRSVRRQKFEKSGLQLTPSALSNGSSHTA  
STGTGTSDETEDEGSTPSAENAERSLASTLGGSSENLPQSSTNSFLHAALPEGPGLTTPME  
RGGSSRRSISAKHNTENGKVAAPPTITKSYTSTKKEELLQVINVKVQOLENGTRKNGNT  
RLNAIAEVGHRPLRGSHSISDLSLAANLDGSRNAGGGPGRYQKPVDSHDTSQYTPQNTT  
ATAAPTNTQQQIQPPVQQQYQIPKEPHQQAQQQHQQYAPPASQQFFNCAAPKSKLQQNFQ  
TMRQVQQHYPPYPHVGHVQIHPPPGVFPFGGSAAGSTSAMRSHSQPNRQQQQQQQQRA  
KRNPA GNNRRTPSILKHYKSCPVPVHEEVEWSAEGNERGALLGEPKRHSVYADDARTIL  
DMIHADTEKMIDEITRKYGLDEPGIPASYSMPANLRNLGGLGSTGDSTPTGRTTQYYVY  
REFYQCERKVSLSLILQPEQFAASQRRLEARFLETQRHSSASFFLTGQSQESL SLLSD  
GDGPGSYCNSLESVLSDESDCQSAPLEYPQTQVAVLQQRHAGIRNFI IHGPVSKSYGNP  
NAYGSFDYYMRQQHSTTTDSFDVTGYNLEPLKPLPSSKTYPRIAQVQASENIPTLRSKNK  
QYTSGVNKS LSTDF AQQRQQRNSNPMQSGDNLFVRKPLKPKPPVPAKPHNLVSTLSHMEK  
QQKQKSQRTASVVQQFEHNLQKFEKEKQREREQRRPAMRSSVSSGALAGGSTTQSCLK

KVSRFDTSESSRRATSVRQKNRPKISVRFNTVSQIKYTPSAKRERQAREEEPPMEMEVGSL  
PSDYGERSFEMYFAENGNAPENLENMQTLKLYTKPQLQAVVDEIQQEREKYRKNLDNAGK  
ISGKGGSGKGGAGSSTSHQCQNI AKKIDII EKLIAMEENKMEQIRLATESRLRPFNCNA  
KEKGYVKSLTMNFDMLARGEDPTEDEDLASKDASDL CAYARNIRRNC SLPDVLESTDFTG  
IYNSQGVELAKEVIADDES G D P V N P G I T A D S A D H D G I G Q T V V L R M E P G N P K T L N P M P I E E  
SSIRRACSLSDLHMGNFNGKPKGSQNGTPQKQVQHRNGNVSRSASKRNSLQGKTGLGASS  
NSMNVLNQGS D S E P E D S N R L R S A S N G Q G R S N G P I A A N R Q Y S N K I N N V N N N R R K T P N F S S A  
TPMQDDSSSEETPNSTVNKPIVPPRPRNLAFDHKSKLMINNSGSPGGNAKQRSGVTSTE  
DFEGTDPEAQVHNVINKLYTTTTQAAMQLHANLKNLTLKLELENALIMSRNMLSSITNRQA  
DKTNNGGGGLGVGGSGGLNHDQLNADNGDYLMMVNNCADLLSNLRTKHKPDDCENNS

>Anopheles gambiae\_XP\_320082

SLQIKLKKILGLTVCSAGLDVSSTTGVLAYPAGCTVVLFNSKKLSQNFLNNTTKKAITA  
VAYSECGRYLATGECGHNPSIKVWELDASGGPGGGGAIENGTAGSIVA E F S G H K Y A V S C V  
AFSPTGKYLVS V G S Q H D N I V N V F D W K A N L K I A S N K V T A K V V A V S F S E D G N Y F V T V G N R H V  
KYWYLEGSRKYKEPIPLMGRSAILGELRNNDFCAVACGKGEMAESTYAITRNGHLVEFNA  
RRLLDKWMVCRNTNAANCMVASTKYILVGCAEAIVRVFNAETLEYITTLPRTHFLGVDVAQ  
GVHINHMMAVPQNAKYPDTIAIVYDEARSKVTCVYNDHSLYIWDLRDIRRVGKSQSFLYH  
SACIWGVETVPFSYQQQLRQHNGGAANGAGDTLP S D C F M T C S S D D T I R V W D V D S C E T N E V  
YRKNIIYSKELLKVLVIDDELNF IKDTDNP IHSTEKNSSYDGRNGVRCIKISPDRQLATG  
DRSGNIRIYNLSNLKLITTEAH D S E V L C L E Y T N E K I E R R L L A S A S R D R L I H I F D C E A N Y  
RILQTLDDHSSSITSVRF IGAGKQFQMVSCGADKSIIFRHFQNNVFLRGNNCSGKNTLYD  
MEVDSNSKHILTACQDRNIRVYSTQNAKHTKTFKGS H S D E G S L I K V S L D L S G I Y I A T S C T  
DKTLSVYDYYSNECMARMYGHSELVTGLKFTNDCKYLI SASGDGCVFIWQVPHDMIIVTMQ  
ARLSQQALRSGLQPIPRTLQPTNPFTDAILNHPQPTPPAPSSVSEFGSPPNFAFLVDDAP  
GTPGYRFS D V G Q L P Q W A K R K P S E D L Q S S S P V L G S S P S Q T G A N F G G L A P K P R G R W G Q K G V G  
GQLEDPFDLRNIVESSPLGTTFFVAPGQPIHPPATNPTPTSGYNSSGSKDVYSNAYLSEDSS  
IDSGRENRRPDLSSFLHKKITETKALNSL N S E S N T E H D G D V E D I S D G E R T S S D H G M V Y Y P  
SAAPSTPTDFKINEIDTNELRKSIRRQKLEKQGLSLAAQFQSAASGTGTGTSDDEDEGEST  
PSGDNADRSLASTLGGSESI PQQTSSTFLQAVLDGPGSLSDRERSQARKSMSAKHNDA  
KITTSISKSFANNKKEELMKVINEAKAKLENVGYRSGLRASHSISDL SHSMNMSGASPNR  
TQRIGGNPRSLISAQDSESSIRRACSLSDL SMGKGKASGQYKPSVSNRNTSTPTRNTPKR  
STSSVGKGGASLSTGMGVRISISVGM LN Q A S D S E A E P A G T R G G L L K P T I S S Q N K I N G T G N G  
TGPGSGGKYINPRSAAGI INRRKGLQNA Y S S V N I S T A G Q D E S S E E S P T S T V S T V P A K P A  
VPPRPRSI A F E H K R I A N A S Q L N V K K T V T V G G T T T I P A D A T T N V T N Q L C T N I I N Q L V Q T T S  
TVIQLHQRLKSSDEAS INGRNNSLMLKELENAVIMTQNMLTKVTNRNHNDGINNNSMSNN  
TNNQIMYEKCV D M L N Q V Q K H V N N N G

>Amphimedon queenslandica\_XP\_3384409

MSKRPVLAKKRKQKKEEEKVVLD R V L G L T C S N G N S L S V S S A G S C L V Y P A G C T V V L Y Y P K R  
SKYGHIINPSKKPISCLSLSSDGK F V A F G E C G H N P A V Q V W D V V S P P T H L V S L K G H A F G V  
ACLGFS P N G R Y L I S I G Y Q H D Q N I H I W N W R G G V K L A S N K I T S K Q V F G L A F S Q D G S C F V T C G  
SRRVRFWYFDTNQRYKSTLTHPLNGRSAILGDHQNNTFISVRCGHGRHSGLTYSLSLTKSGL  
LCQFNSSRELDKLT DIKSGRAYCLEYSESFIMCGCGDGVVRLFD PATLDYIVTMPRPHPL  
TVQLSFG L Q S T V A S Q Q F I T E P G K C P D T V A L G Y D N N N N K L V A V Y N D H S L Y I W D L K N L K A I G  
KTHSFLYHNACVWDVQAYPPLANGVIPSLSFITSSSDNTVRFWNLTESNGSETQLKNVYS  
KEIFHIIYTD D T D T T C L R D T S L L P G D S T A V A D A S R G V R S I Q F S P E G R H L A V G D R Q G N L R V  
YDLQFM D K I V E V V A H D S E I L S V Q Y S P E V F V F A I E I Q Q G N R M L L A T G S R D R L I H I F D V S D N  
YNHVHTIDHHSASITAVNFSISQDTLYLYSCGADKSLFFYTLDKNGSFKRAHHIAEKSSM  
YDMIVDPTSSLIATASQDKFLRVYGITTGKLNKNSCKVCEDEGTTGLLKLSLDCSGSYVAV  
SGSDKCVYVLFHITGELLCKIQGHSEVV T G L M F S N D S S Y L L T T S G D S C V F V W R L S L D M K E  
NIRRRLKENKQTAYLEY Y T P Q T I P T P T T P T L T T P T L A T P M P V D R R E T Y V I P K A D K D G A H S  
LDETDVPDEEGEDEEGFRFSVSKLP SWAQR TVYSRPSIAATVGVETKKGEGEVTVP P P P D  
GTAVAGRWAERVTAEQFIMIEDKDASSEGESSEAEIEMVETRDS PENTENIKVEKDEDGE  
TNS S L E E E E K E E E T L M K Q V M E K L L E E E E E E D T T D S Q T Q P S V T D S L M S N E E L V Y P K S T G R D S  
VDPSMFKVTT PERRASVKNVAELVSPTEKKVGE E E E E E E E S P D S T C S T P E T N I K S L G T L I V  
DES AFLRTHFESLTAEKADLIFGPAPETDSPGVGPTRGFSPPCSRPSISAIYYNRRRSFT

TGCIKIRPVTSSSTSTNYASPELTDNRYRTLPTSPRSTETESVIDISSEETSEPKTLTVEE  
ERKEEEEGEEEQGRDVSDDGDDSSKSHETGETGNIVRFRPRGRVVKRPKITREEITKTRKR  
LEELGYSEFAESSKAKEAIEGEVKSVEDVHVDQGTQDDNKKEREEEEEHGARESVMKED  
AQSLVEDDDKVSFDELNRSLSLSTDNSTKLQSLISTSLQTLSSRLSDIRQSATLDSLTT  
TTNPPTSQPKPAALPGAESLEPFLNLSERLIAMMKEKLEKSED

>Homo Sapiens\_WDR16

MEAVVLPWQIFGVREL PVERGVTMKGPRLFRAPGHVPTGLKCHPDQEHMIYPLGCTVLIQ  
AINTKEQNFLQGHGNNVSLAISRSGEYIASGQVTFMGFKADII LWDYKNRELLARLSLH  
KKGIEALAFSPNDLYLVSLGGPDDGSVVVWSIAKRDAICGSPAAGLNVGNATNVIFSRCR  
DEMFMRTAGNGTIRVWELDLPNRKIWPTECQTGQLKRIVMSIGVDDDDSFYLGTTTGDI  
KMNPRTKLLTDVGPADKDFSLGVSAIRCLKMGGLLVGSGAGLLVFCKSPGYKPIKKIQLO  
GGITSITLRGEGHQFLVGTTEESHYRVSFTDFKETLIATCHFDAVEDIVFPFGTAELFAT  
CAKKDIRVWHTSSNRELLRITVPMNTCHGIDFMRDGKSIISAWNDGKIRAFAPETGRLMY  
VINNAHRIGVTAIATTSACKRVISGGGEGEVVWQIGCQTQKLEEALKEHKSSVSCIRVK  
RNNEECVTASTDGTCTI IWDLVRLRRNQMILANTLFQCVCYHPEEFQIITSGTDRKIAYWE  
VFDGTVIRELEGLSGSINGMDITQEGVHFVTTGGNDHLVKVWDYNEGEVTHVGVGHSNI  
TRIRISPGNQYIVSVSADGAILRWKYPYTS

>Gorilla gorilla\_WDR16

MEAVVLPWQIFGVREL PVERGVTMKAPRLFRAPVVVWSIAKRDAICGSPAAGLNVGNATN  
VIFSRCRDEMFMRTAGNGTIRVWELDLPNRKIWPTECQTGQLKRIVMSIGVDDDDSFYLG  
TTTGDIKMNPRTKLLTDAGPAKDKFSLGVSAIRCLKMGGLLVGSGAGLLVFCKSPGYK  
IKKIQLQGRITSITLRGEGHQFLVGTTEESHYRVSFTDFKETLIATCHFDAVEDIVFPFG  
TAELFATCSKKDIRVWHTSSNRELLRITVPMNTCHGIDFMRDGKSIISAWNDGKIRAFAP  
ETGRLMYVINNAHRIGVTAIATTSACKRVISGGGEGEVVWQIGCQTQKLEEALKEHKSS  
VSCIRVKRNNEECVTASTDGTCTI IWDLVRLRRNQMILANTLFQCVCYHPEEFQIITSGTD  
RKIAYWEVFDGTVIRELEGLSGSINGMDITQEGVHFVTTGGNDHLVKVWDYNECEVTHV  
VGHSNITRIRISPGNQYIVSVSADGAILRWKYPYTS

>Pongo abelli\_WDR16

MDNKISPEAQVAELELDAVIGFNHVPGLKCHPDQEHVIYPLGCTVLIQAINTKEQNFL  
QGHGNNVSLAISRSGEYIASGQVTFMGFKADII LWGYKKRELLARLSLHKGKIEALAFS  
PNDLYLVSLGGPDDGSVVVWSIAKRDAICGSPAAGLNVGNATNVIFSRCRDEMFMVTAGNG  
TIRVWELDLPNRKIWPTECQTGQMKRIVMSIGMDDDDSFYLGTTTGDIKMNPRTKLLT  
DAGPVKDKFSLGVSAIRCLKMGGLLVGSGAGLLVFCKSPSYKPIKKIQLOGSITSITLRG  
EGHQFFVGTTEESHIFQVSFTDFKETLIATCHFDAVEDIVFPFGTAELFATCAKKDIRVW  
TSSNRELLRITVPMNTCHGIDFMRDGKSIISAWNDGKIRAFAPETGRLMYVINSHRIGV  
TAIATTSACKRVISGGGEGEVVWQIGCQTQKLEEALKEHKSSVSCIRVKRNNEECVTAS  
TDGTCTI IWDLVRLRRNQMILANTLFQCVCYHPEEFQIITSGTDRKIAYWEVFDGTVIREL  
EGSLSGSINGMDITQEGVHFVTTGGNDHLVKVWDYNEGEVTHVGVGHSNITRIRISPGNQ  
YIVSVSADGAILRWKYPYTS

>Equus caballus\_WDR16

MESQISPKAEVAELELEAVIGFNHVPGLKCHPDQEHVVYPLGCTILIQAVNTHEQNFL  
HGHDNNVSLCTISKSGIYIASGQVTFMGFKADII LWDYKKRELIARLSLHKGKIEALAFS  
PNDLYLVSLGGPDDGSVVVWSIAKRDAICGSPAAGLNVGNATTVIFSRCRDEMFMVTAGNG  
TIRVWELDLPNRKIWPTECLTGQMKRIVMSLTMADDDSFYLGTTTGDIKMNPRTKLLA  
DTGPAKDKFSLGVSAIKCLKMGGLLVGSGAGLLVFCKSPSYKPIKKIQLOGGITSIALRG  
EGHQFFVGTTEESHYRVTFTDFKETLIATCHCEAVQDIVFPFGTAELFATCAKKDIRVW  
TSSNRELLRITVPMNTCHGIDFMRDGKSIISAWDDGKIRAFAPETGRLMYVINNAHRIGV  
TAIATTSACKRIISGGGEGEVVWQIGCQTQKLEEALKEHKSSVSCIRVKRNNEECVTAS  
TDGTCTI IWDLVRLRRNQMILANTLFQCVCYHPEEFQIITSGTDRKIAYWEVFDGTVIREL  
EGSLSGSINGMDITLGVYFVTTGGNDHLVKVWDYNEGEVTHVGVGHSNITRIRISPGNQ  
YIVSVSADGAILRWKYPYTS

>Loxodonta africana\_WDR16

MDTQTSPEAEVAELELEAVIGFNGHVPNGLKCHPDQEHLIYPLGCTVLIQSINTNEQNFL  
HGHGNNVSCVAVSKSGVYLASGQVTFMGFKADIILWDYKKRELVARLSLHKGKIEALAFS  
PNDLYLVSLGGPDDGSVVVWSIARRDAICGSPAAGLNVGNATTVIFSHCQDEMFTAGNG  
TIRVWELDLPNRKIWPTECQTGQMKRIVMSITMADDDSFYLGTTTGDIFKMNPRTKLLT  
DTGPKDKFSLGVS AVKCLKMGGLLLGSGAGLLVFCKSPSYKVIKKIQLQGGITSITLRG  
EGHQFFVGT EESHYRINFTDFKETLIATCHCEAVQDIVFPFGTAELFATCAKKDIRVWH  
TLNRELLRITVPMNTCHGIDFMRDGKSI VSAWDDGKRAFAPETGRLMYVINSSHRIGVT  
AIATTS DCKRVI SGGGEGEV RVWQIGCQTQKLEEALKEHKSSVSCIRVKKNNEECVTAST  
DGT CIIWDLVRLRRNQMILANTLFQCVCYHPEEFQIITSGTDRKIAYWEVFDG SVIRELE  
GSLSGSINGMDITVEGVHFTVGGNDHLVKVWDYNEGEVTHVGVGHSGNITRIRISPGNQY  
IVSVSGDGAILRWKYPYAS

>Mus musculus\_WDR16

MEEQVLPELDVAEELQAVIGFNGHVPNGLKCHPDQEHLIYPLGCTVLIQAINTNEQNFL  
HGHGNNVSCVTISKEGDYIASGQVTFMGFKADIILWDFKKRELIARLSLHKGKIEALAFS  
PNDLYLVSLGGPDDGSVVVWSIAKRDAICGSPAAGLNVGNATSVVFSRCRDEMFTAGNG  
TIRVWELDLPNRKIWPTECQTGQMKRIVLSTGMADDDSFYLGTTTGDILKMNPKTKLLA  
DTGPKDKFSLGVSALRCLKMGGLLVGSGAGLLIFCKSPSYKPIKKVQLQGGITSITLRG  
EGHQFFVGT EESHYRVNFTDFKETLIATCHFEAVQDIVFPFGTAELFATCAKKDIRVWH  
TMSKRELLRITVPMNTCHGIDFMRDGKSIISAWDDGKIRAFAPESGRLMYTINSAHRIGV  
TAIATTS DCKRIISGGGEGEV RVWQVGCQTQKLEEALKEHKSSVSCIRVKKNNEECVTAS  
TDGT CIIWDLVRLRRNQMILANTLFQCVCYHPEEFQIITSGTDRKIAYWEVFDG SVIREL  
EGSLSGSINGMDITQEGGHFVTGGHDHLVKVWDYNEGEVTHVGVGHSGNIMAMRISPGNQ  
YIVSVSADGAILRWKYPFAS

>Rattus norvegicus\_WDR16

MEEQILPETDVAEELQAVIGFNGHVPNGLKCHPDQEHLVYPLGCTVLIQAINTNEQNFL  
HGHGNNVSCVTISKEGDYVASGQVTFMGFKADIILWDFKKRELIARLSLHKGKIEALAFS  
PNDLYLVSLGGPDDGSVVVWSIAKRDAICGSPAAGLNVGNATSVVFSRCRDEMFTAGNG  
TIRVWELDLPNRKIWPTECQTGQMKRIVMSSGMADDDSFYLGTTTGDILKINPKTKLLA  
DTGPMKDKFSLGVSALRCLKMGGLLVGSGAGLLIFCKSPSYKPIKKLQLQGGITSITLRG  
EGHQFFVGT EESHYRVNFTDFKETLIATCHFEAVQDIVFPFGTAELFATCAKKDIRVWH  
TMSKRELLRITVPMNTCHGIDFMRDGKSIISAWDDGKIRAFAPESGRLMYTINSAHRIGV  
TAIATTS DCKRIISGGGEGEV RVWQIGCQTQKLEEALKEHKSSVSCIRVKKNNEECVTAS  
TDGT CIIWDLVRLRRNQMILANTLFQCVCYHPEEFQIITSGTDRKIAYWEVFDG SVIREL  
EGSLSGSVNGMDITQEGEHFVTGGHDHLIKVWDYNEGEVTHVGVGHSGNIMGIRISPGNQ  
YIVSVSADGAILRWKYPFAS

>Monodelphis domestica\_WDR16

MADADTLPEPEVLGLELQAVIGFNGHVPSGLICHDPQEHLVYPLGCTVLIIESINTKKQYF  
LHGHGNNVSCVTISLNGAYVASGQVTFMGFKADVILWDYAKKELIARLSLHKGKIEALAF  
SPNSKYLVS LGGPDDGSVVVWSVTKRDAICGSPAAGFN VGNATTI IYSNCREEMFTAGN  
GTIRVWELDLPNRKIRPTECQTRQLKRVVLSIAMAEDDSFFYIGTTTGDILKLNPRTKLL  
ADTGPVKDKFSGGVTTIKCLKMGSVLIGSGAGVVALCKSPSYKPIKKIQLQGGVTSVALR  
GQGHQFFVGT EAAHIYCLSYTDFKAELIATCHSGAVQDIVFPFGTADLFATCSKEDIRVW  
HTSSNRELLRITVPMNTCCAIDFMRDGKSIISAWN D GKIRAF TPETGRLMYVINNAHSIG  
VTAIATTS DCRRIISGGGEGEV RVWWEIS PQSQKLEEALKEHKSSVSCIKVKKNNEECVTA  
STDGT CIIWDLVRLKRNQMILANTLFQCVCYHPEEFQIITSGTDRKIYWEVFDG TVIRE  
LEGLSGSINGMDISSEG VHFVTGGDDHLVKVWNYSDGEVTHVGVGHSGNIRMKISPNN  
EHIVSVSADGAILRWKCPFTS

>Gallus gallus\_WDR16

MATATPEERAAGGLELQAAIGFNGHVASGLICHDPDNKHLLYPLGCTVVIQDLASKKQTF  
HGHTNNVSCVVVSRSGNYVASGQVTFMGFKADIILWDFQKKELLARLSLHKGKIEGLAFS  
PNDLYLVSLGGRDDGSVVVWVNSKREAVCGSPASARSAGNV TIVECSACRDEMFTAGSE  
TIRVWELDLPNRKL RPTECQTGQLRRVITSLQIADDDNYFYVGTSTGDV LKV NTRNKLMT  
DFG PQK KFS LGVTALLLLKTGDV IIGT GEGTVALCKGSNYRVMKNIQVHGGVTS LTRGQ

GHQFFVGTKMCQIYRVNYTAFKEELITTTCHSEAVHDIVFPFGTSDLFATCSKDDIRVWHT  
PEHRELLRIVIPNMTCYAIEFMRDGSIIISAWNDGKIRAFMPESGREMYVINNAHSRGVT  
AIAATSCKRIVSGGGEGQVRVWAIGEKTRKLEGLVKEHISAVSCIKIKKNDKECVTASL  
DGTCTI IWDIGRFTRKQMILANTLFLKVCVYHPPEEYQLITSGTDRRIGYWEVYDGS AIRDLE  
GSLSGSINGMDITSDGAYFVTGGDDHLVKMWDYNEGTVTHIGVGHSGNITRLKICPGNKY  
IVSVSADGAILLWKYPGCP

>Anolis carolinensis\_WDR16

PNEEAAPPEDLAGLQLEAII GFNGHVPCGLICHDPDREHLIYPLGCTVIVQGINIRTQEFL  
HGHTNNVSCVTI SASGSYVASGQITFMGFKADII LWLDYNKKEMWARLSLHKGKIEENLAFS  
PNDLYLVSLGGQDDGSIVVWSIQKKEAICGSPASARSAPNPTSLVYSNCRDEMFI SASGS  
TIRVWELDLPNRKIRPTECHTGQLKRIVTCIMITDDDKYFCIGTSTGDIVKLNTKSTLMS  
DYGPKDKFSLGVTALLLLKTGDLVIGTGTGLIALCSASNYKVKKKVQLQGAITSITPRG  
QGHQFFVGTTEEAHYRFSYSDFKDELIATCHNEAIIHDIIFPYGTSDFATCSKSDIRVWY  
TPENRELLRITIPNMTCHAIIDFMRDGSIIISAWNDGKIRAFTPETGRLMYVIEHAHSMGV  
TAVASTDCKRIISGGGEGQVRVWEIGKETRTLEEVMKEHISSISCIKIKKNNQECVTAS  
IDGTCTI IWDLVRFMRRQMILANTLFLKVCVYHPDEHQLITSGTDRKIAYWEVFDGSPIRD  
EGSLSGSINGMDITSDGAYFVTGGDDHLVKVWDYNEGEVTFVGVGHSGNITRLKICPNK  
YIVSVSADGAILRWKYPHVH

>Pelodiscus sinensis\_WDR16

MGFKADII LWDYKKRELLARLSLHKGKVEKLA FSPNDLYLVSLGGQDDGSVVVWSIAKRE  
AICGSPASARSAGNATVLA FSSCRDES FVSAGNGTIRVWELDLPNRKIRPTECQTGQLKR  
VVTICIMMAEDDSYFYVGTSSGDLKLNKMSKLSMDYGPVKEKFSLGVTALLLLKTGELVV  
STGGGVVALCKGSNYKPIKIKIQVQGGITSLTGRGQGHQFFVGTTEESQIYRLNYNEFKEEL  
IATCHNEAIIHDIIFPSETSDFATCSKSDIRVWHTPENKELLRITIPNMTCHAIIDFMRD  
RSIIISAWNDGKIRAFTPETGRLLYVIDHAHSMGVTAIATTS DCKRIISGGGEGQVRVWEI  
GQHTRKLEGLVKEHISTISCIKIKKNNRECVTASTDGTCTI VDWLVRFMRNQ MILANTL FQ  
SVCYHPEEHQIITSGTDRKIGYWEVFDGSAIRNLEGLTGSINGMDITSDGTYFVTGGDD  
HLVKVWDYNEGEVTHVGTGHSGSITRIKICPGNKYIVSVSADGAILRWKYPHSP

>Xenopus tropicalis\_WDR16

KRRTVMAEQGEDNRLELQGIIGFNHVP SGLISHPDREHLIYPLGCTV I IENLSSRKQQF  
LQGHNTNNVSCVAASRSGRYLASGQVTYMGFKADII LWLDYGRREACAKLTLHKVKVEALAF  
SPNDLYLVSLGGQDDGSVVVWVNAKREAI C GSPASSLSSGHATTIIFTNNSDDIFMTGGN  
GTLRVWDVLDLPNRKMRPTECQLGQMKRVVTCLOVAEDDSCFYCGTSSGDILTINTKSKLL  
SSFAPQKGFSLGVTALRLLKTGELLVSGDGLALCKGPNYKAAKTVQLQGSVTSISLR  
GQGHQFFVGTGGAQIYRFSYPEFKEELIATCHSEAINDIAFPFGTSEL FATCSKNDIRVW  
HTATHKELLRITIPNMTCLAIDFMRDGSIIISAWNDGRIRAFMPESGRLMYCIENAHSMG  
VTAIAATSCKRIVSGGGEGQVRIWEISKETQRLVQSMKEHKS SVTICIKLKGNNRECLTA  
SSDGTCTI IWDIVRFRQLQMVLSNTLFRVCVYHPEEFQFVTSGTDRKVG YWEVFDGSAIRE  
LEGSKSGAINGMDICDQGAHFVTGGDDKLVK VWDYNEGEVTHVGIHSGNITRLKICPLS  
KYIISVSTDGAILCWDYPYGLR

>Latimeria chalumnae\_WDR16

FPPPLLTGQVPAGLIAHPDRENIYPLGCTV I IQSLKNKKQSFLHGHTNNVCC LGVSRDG  
TYLASGQVTYMGFKADVI IWNYAQRELYARLSLHKAKVQSVAFSPNGLYLATLGGQDDGS  
LVIWVNAKKEAICGSPASAVSSGNALTVKFSNHSDEIFITAGNTTIRVWELDLPNRKIRS  
SECQTGQLKRIVNCIEI SEDDAFFYCGTTTTGDILKLGKLNKLLSSYAPQKEKFLGVTAL  
ALLKTGDFLVSGDGFVALCKPSTLKI V KKAHLHGAVNSIALRGEHQFFAGTGCAQIYR  
FNYVEFKEELIAACHNEAVNDIAFPFGTSEL FATCSKSDIRVWHTQSKKELLRITIPNMT  
CHGIDFMKDGKSIISGWNDGKIRAFTPESGRLMYVINNAHSIGVTAIAAIGSCKRIVSGG  
GEGMVRVWEIGQGFNTLIESMKEHKASVSCIRVKSNDQECVTASTDGTCTI IWDIVRFVRN  
QMVLANLTLFRVCVYHPEGYQIITSGTDRKIAYWEVFDGTPIRELEASVSGSVNGMDISQD  
GKYFATEPGGDEKLIKLGWYNEGEVTHVGI VHNDFIITVDPEDDDGGFKNNPPCGLGANS  
DKLAEVVPASGGETVTGKKSTTLTSQGSAKERLSSWCYYGDKTPGVQGLKNHGNTCFLNA  
VVQCLSNLTLFAEYLGLEQYKSDLNQGKLN GIVRSNSGELQGRGEVTEQLASLVRALWTL

EYTPQLSVEFKVSGPKKNLI

>Takifugu rubripes\_WDR16

MDADTHGLPPVELRAVFGFNGSVRSGLSVHPDGEHLIYPLGSTVVLRTIKDGRQELLQGH  
TSDVSCVSVSRSGSLIASGQVDCMGFKAVII IWDYPQRRSSAQLLLHEAKVEALDFSPDE  
KYLVSLSGGQDDGRVVVWVNETRQAVCGSAASGRSTSPCLTVRYSNTNSNLFVVTAGSSALR  
VWELDPLNRKIQTPECQTGILKRAVEICIEISEDDEFVFCGTTSGDIMKFNKTRRLSDYG  
PKRFSAKHSRSVSALRTLKGGHLLVSGCGKMLMLCSASSFQALKEAQLEKAVTSIALSGE  
GQQFFVGTAAQMYGFRSEDFRAELISSSHRSVAVKDVAICFGTSELFATCSEEDIRVWHI  
DKPKELLRITVPMNMTCNALDFMSDGHSSII SAWNDGKVRVFAPESGRLVLI IHDAHNTGVT  
AIAGTRNCKRIISGGGKGMVRVWELQPKGHRLLETMKEHRGAVTCIKIKSDDKECVSASS  
DGACIIWDLVRFVSLKMVITTRLFRAVCYHPDIYQIITSGTDRKVYWDAYDGSARELE  
GLLTGSINAMDISQSGTHFVTATSGGDDKLVKVVWDYMEGAVTHVGMAGGSSITGIKLCNS  
SSTLISTSADGAVVLRWRFPHSPA

>Tetraodon nigroviridis\_WDR16

MQADAHGVASVELRSVFGFNDPGRVCSGLRRLHPDRERLLYPLGSALILRTIKDGQQLLQ  
GHTNDVSVLSVSRSGSYVASGQVDCVGFKAII IWDYAQRGIYAQLLLHEAKVEAVDFSP  
DEKYLVSLSGGQDDGRVVVWVNASRQAICGSPASGRSSSSCLTVQFCNTNSNLFVVTAGSSA  
LRVWELDPQNKMEPTTECRTGILKRVVTCIEIESEDDQFLFCGTTSGDILKINLRTRLLSD  
YGPKRSSAKHGRSVSALRMLRSGHLLVSGCGKMLMLCSATGFQALKEAQLEKAVTSIALS  
GEDQRFVGTAAQMYSSISQDFRPELVSSSHRSVAVKDVAICFGTSELFATCSEEDIRLW  
HIDKPKELLRITVPMNMTCNALDFMTDGHSSII SAWDDGKIRVFAPESGRLMLI IHGAHNMG  
VTAIAGTRNCKRIISGGGTGMVRVWELQSKGHRLLETMKEHKGTVTVCVKGDDKECVSA  
SSDGVCIIWDIVRFVSLKMVITNRLFRAVCYHPDIYQIITSGTDRKVYWDAYDGSARE  
LEGLLAGSITAMDISPSGSHFVTGGDDNLRVWVWDYMEGVVTHVGTAGGSSITSIKLCNS  
STLISTSADGAIVLWRFPHSPT

>Gasterosteus aculeatus\_WDR16

LDETMSLETHGVPQLELEAVIGFNGYVSSGLRVPDSEHLIYPLGCSVILKRIKGGKQES  
LHGHSNNVSCVSVSKSGSYIASGEVTFGLFKAVII IWDYAQRSIYAKLQLHKAKIEALAF  
SPNDKYLVSLSGGQDDGRIVVWNIETKQAICGSAASPGMAGDCLTVQYSNTDDNVFVSAGS  
GTLRVWELDRANCRIQTPECQTGRLLKRVKCVQISEDDQFIFCGTTSGDIMEINLKMGRLL  
TNCGPTEGKYSMGVNVLRIQCGLDLVSGSGILTLCSGTNFKTLNFSQNKVPLEKGV  
SLAIGGEGKQFLVGTAAQMYRFGCDFRKELISTSHNSAVKDGLICFGTSELFATCSDDI  
RLWHRDNERLRIIVPNMTCNSLDIMLDGHSSII SGWNDGKIRVFAPESGRLMLI IHDAHQR  
GVTAIAGTRDCKRIVSGGGDQVRIWELLPHGHRLVETMKAHTATINCIKIKSDSKQCVT  
ASADGACIIWDLVRFVSLQVMVTNTRLRDVCYHPEEYQIITSGSDRKVAYWVDFDGTILIR  
ELEGSKFGSINGMHSIQDGKHFVTGGDDKLVKVVWDYMAGTVTHVGVIAHGASITRVKICSN  
NRTIISTADGAILRWRFPHPSPS

>Oryzias latipes\_WDR16

SAESQFPKINIPQLELEAVIGFNGRVPSGLRRLHPDKQHLIYPLGCTVILRSISDDKQEFLL  
HGHTNNVCCLSVSRSGTYIASGQINFLGFKTTVF IWDYAQRSVYAEVLVHKAKVESLAFS  
PNDKYLVSLSGGQDDDSIVVWNIETKQAICGSTATSHVARHCLVVQYSNTDDNVFVSAGRG  
SGTLRVWELDVANRKIRPTECKLGLQRNIKVEISNDDQFLFCGTTSGDILKVNLRRTGL  
LSDFGPVKAKHSLGVSVLRVMSGDLLVSGSGVLTLCSTNFKMLQSIQLEKGVTSITI  
KDTGQQFFVGTAAQLIYRMSDDFKAEVVFTSHTSAVKDVVMPFGTSELFATCSDDDIRL  
WHIDKPKELLRIPVPMNMTCNALDFMIDGHSLI SAWNDCKIRAFGPETGRLMFTINDAHKM  
GVTAIAGTRDCKRIVSGGGDQVVRVWELLPHCHRLVEIMKEHKATVSSLKIKSNDKECVT  
ASVDGTCIVWDLERFVGLQRMIAANTVFRAMCYHPEEHQIITSGTDRKLSYSFLYDGSIIIR  
ELEGSQSGAINAMHITKGGYFVTGGDDRVVRVWSYMEGVVTHVGVIAQGGSSITSMKICSN  
NRILVTTTADGAIMQWKFPHPP

>Drosophila melanogaster\_FBpp0076646

MGDSDHVCRRQLLPRAIFGINGKVENGVQRHPVTGSIIFALGNKIGIADYKKNQEFVAGH  
TNTISCLDLKSGKYMASGQINHMGRFGYVIIWNYDQRKEIARHDLHKVSVQAICTAQD

RCVVSIGGVDDGSVIVFDMEAFSPICQTPASRAISGNALTVRPLHNNPYFFVVTAGDRHLR  
LWSILREEKKLYVQDVLMSKTRVIFYCARINKTDEFAYLGTGTGDIVKIVLNCCDRDHVS  
KQGSTSCILGAFGTHNPRKPTGRDCNRYVNGVRALYVLEGGRLLIAGNGDIELVEERTD  
VPLINFRDYPGPTWPYLRTLKKTHTVSGRISSFVRSKTDIFYICTDTNEIYGLNIKTWVLK  
LLRRTCHTKSVYICITFPKNYSGVFATSQKECIRIWSGRKQELLRIMVYNFNCACVRFTHD  
GTSIVSVWNDGIIRAFTPIITGRLIYAIPNAHNKGCSSALAVASSGRLIVTGGIEGQVRVWK  
IDPYRQDLVGLKDHSGPITSLDINYLDTDEVISACTDGSQVWIDIKRMTRKQVVTANTQF  
MSASYFPTGVQVITCGSDGRIIYWMVYNGALIRELTASKKSSVNCLAINETGDYFITVGS  
DLQVKLWDYNSGAVVGIGSEHASSVISCAYSPCMTMFVTGSTDGSLIWDVPRDFWGRPN  
PPDVTKYSLPKTSSKTRMSDVQSRVNSGTNLKTSKGENIDGLLKATPKDDLCCVECPPCA  
KKDTKGVDPYAECGIVPDVRKC

>Apis mellifera\_XP\_624617

MDIKELEVFGLIAFDGIMRNLKLPDGEHLVYPMGNKVTVKHVKTGEQFFFAGHKNFVS  
ALCISSSGDLIASGQVNHGFKAMVIIWDYVNRKMKLSYIEHKVRVEDVCFTENGKYLIS  
LGGRDDGRIIIVWDIENETPLCSTSIGNESFGNITLIARTNVCQTSFMTAGDKTLKLWRID  
LEERKMYGTDVKIGKMKREINCLVINETDEYVYCGTTSGDIKARLNIEKSKEITKYPVM  
IGCYSKIPTQKRKTNQNGEYAGGVKNLLLLLEKEKLVGAGDGTVELIEIIEKESKLTAK  
ITKALVIPAIMTYCSRNVCGMVTSMVRYKNEFILVGTALCEIYEIELSRFHMRLIVTCHT  
NSIFDVAFPRNYSEIFATTSKNDIRVWKLITQKELLRISVFNFISSICFNCSGNSIIISA  
WNDGAIRGFALNGGKLLFEINGAHTKSVSTITITITNDDSKLISGGCDGQVRIWDAKSEIRY  
LLQVLKEHRGPITSLQVSPDNESSLISSSTDGTCILWNLRNFTRFMLRGNTMYMATCFVP  
NGVQILTCGTRKIAYWETLDGSLVREIEGSLTGTLTNTISISHDQYFLTGSDDSIKLV  
EYRTANTIRLSLAHAAAVTRCVFAPDDTFIVTASADGAIMIWKYPFSEKLINKE

>Anopheles gambiae\_XP\_315945

MSIEEPTMMTLEPSAIIIGFDGHVVCGLRVHPDQRHLVFLGNEISIIYECATNKQSFLRG  
HTNTISTLDIISTSGRMVASGQSNHMGFRAFVIWVDWETRKEISRHELHRVVRVQSLCFSSN  
DQFLVSLGGKDCGSIIVWDIEQRTAICGTIATKETTGEATKVASLNKRFTTFVSGGDQNL  
RVWNIDRERKRLTVQDVAVGKLRREFTGMRI SPNDDTLVYGTMSGDIVKINLNCNPNPSP  
PSQDKMPVLLGCFGKHNAKPPGKDCEKYHYGVRDLLLLPDGKLIIGAGDGTIDMVQERN  
GNFKNYRGPTWPELKSQSTKIDGVITSLQIRNGKTLTIGTNGCEIYSLELANFSSSLRL  
LKTCHTNAVYDIAFPYNFSLVFATASHESIRIWTSTKMQELLRIVVFNFASSIVFSRDG  
KSIIISAWNDGVIRAFTPLSGKLIYAIPNAHNKGCSSVAVTSNGKIVVSGGIEGQVRVWKI  
DPYVQSLIGVLKEHYGPIESVHINNYDTEVVSASRDGSCVIWDLIRLTRKHVIFAHTQFI  
AAQYFPTGVQILTAGSDKLIIGYWEAYDGLVREVEGSKSGPINAIDMNMGEYFVSAGTD  
QIVRLWNYQLGVEVAVGIGHASAITSAARYSPNGKFLVTGSSDGGIFVWKVPEVSIWWWWW  
WV

>Amphimedon quaeenslandica\_XP\_3385435

MAGGDKTSEQLEMVNTIGFNRPVNLHVPNGGHEIIYPLGSTVIIQDLASKKQQFLAGH  
SNYISCLACSPSQYLASGQVTHMGFKADAIWVRFNDDDERIYCRLTLHRVKVQAIASF  
SDKYLATLGGTDDNSLVIWDLKCALCGHEAAMQSAGDVYTIASFSSKSDSILATGGDLT  
LRVWEVCVTEKTRKVVPTDCNLGQLKRIINSIEMCDDGSSMLCGTSTGDTLLVNVNTCLL  
KEYGPQKEKYSGLVSVLKVLPSPGDFLIGTNGTVAALRGKTYKCFKSATVEGSITSIAVR  
GSGHQFLVGTSVSQIYLFQFNDFTYELLRSCHADLITDICFPRESSELFATSSHNDVRVW  
HSNTSKELLRIQIPNLLCNALEITPDGKGIITGWDDGKIRVFLPESGKPAYTIHNAHSGK  
VTALSVTSNSKSIISGGGEGQVRIWDFISANNQKMKIALKEHGAI SCIKIRRDDLECVT  
ASTDGTCTIWDLVKNTRAQVLFANTLFKAICYDLQECQVITGGTDRKIGYWETYDGSQIR  
ELEGSTGSIINGMDCQNLVFTGSSDKLIKLVKYNEGEVTHIGIGHSGEINRVKVPDGR  
HIVSVSADGAIIRWRMPVHLLLENEEEGAEGKVTGSTEPNEKPITDEEEEEEEEEEEEEEGD  
GETVIKQEEEEEEKEGEREEGTPAPNVETE

## List of transcript sequences used in this study

>Homo sapiens\_WDR62 (ENST\_401500)

AGGGGATGTAACGGTGCCTCCGGCGTGACGATGGCGGCCGTAGGGTCCGGAGGCT  
ATGCGCGGAACGATGCAGGGGAGAAGCTGCCCTCTGTATGGCGGGAGTTCCGGCGCGGA  
GGGGCCAGTCTCTCCCGCCCCCGCCCCACCAATCTGCCTACGGCGGGACGCGACTCT  
CGACGGCCTCCGAGGAGACGGTGCAGAACCAGGGTGTCACTCGAGAAGGTGCTTGGCATCA  
CAGCCCAGAACAGCAGTGGCCTAACCTGTGACCCCGGCACAGGCCATGTGGCCTACCTGG  
CAGGCTGTGTGGTGGTGAATTTGGACCCCAAGGAGAACAAGCAGCAGCACATCTTTAACA  
CCGCCAGGAAGTCTCTCAGTGCTCTGGCCTTCTCCCTGATGGGAAGTACATAGTGACAG  
GGGAGAATGGGCATAGGCCTGCTGTGCGCATCTGGGATGTGGAGGAGAAGAATCAGGTGG  
CGGAGATGCTAGGCCACAAGTATGGTGTGGCGTGTGTGGCCTTCTCACCCAATATGAAGC  
ACATCGTGTCCATGGCTACCAACATGACATGGTGCTCAACGTCTGGGACTGGAAGAAA  
ACATCGTAGTGGCCTCCAACAAGGTATCTTGTAGAGTCAATTGCCCTCTCCTTCTCAGAGG  
ACAGCAGTATTTTTGTCACTGTTGGGAACCGCCATGTGAGGTTCTGGTTCTTGAAGTCT  
CCACTGAGACAAAGGTGACGAGCACAGTGCCCTTGTAGGGCGCTCGGGCATCCTGGGCG  
AGCTGCACAACAACATCTTCTGTGGTGTGGCCTGCGGTGCGGGCCGGATGGCGGGCAGTA  
CCTTCTGTGTGCTACTCGGGCCTCCTCTGCCAGTTCAATGAGAAGAGGGTGTGGAGA  
AGTGGATCAACCTGAAGGTCTCCCTGTCTTCTGCCTCTGTGTGACCCAGGAGCTCATCT  
TCTGTGGCTGCACAGATGGGATAGTCCGCATCTTCCAGGCCCATAGCCTGCACTACCTCG  
CCAACCTGCCCAAGCCACACTACCTTGGGGTAGACGTGGCACAGGGCCTGGAGCCCAGCT  
TCCTCTTCCACAGGAAGGCGGAAGCAGTCTACCCAGATACAGTGGCACTGACCTTCGACC  
CCATCCACCAGTGGCTGTCTGCGTGTATAAGGACCACAGCATCTACATCTGGGATGTCA  
AGGACATCAACAGAGTGGGAAGGTGTGGTGTGAGGCTCTTCCACAGCTCCTACGTTTGA  
ACGTGGAGGTGTATCCTGAGTTTGAAGACCAGAGAGCTTGTGGCCATCAGGATCCTTTC  
TGACTTGTCTTTCAGACAACACCATTGCTTCTGGAACCTGGACAGCAGCCCTGATTCTC  
ACTGGCAGAAAAACATCTTCCAGCAATACCCTGCTGAAGGTGCTGTACGTGGAGAATGACA  
TCCAGCACCTGCAGGACATGTACACTTCCAGACCAGGGGAGCGAGAATGGGACACCCA  
TGGACGTGAAAGCCGGGTGCGGGTGCAGGTGATGACGGTCACTGACGGCCAGCATTGGCTT  
CAGGCGACCAGTGGAAATCTGAGGATCCACGAGCTGCACTTTCATGGACGAGCTGGTCA  
AGGTGGAGCCCATGATGCTGAGGTGCTGTGCTGGAGTACTCCAAGCCAGAGACGGGGC  
TGACTTGTCTGGCCTCAGCCAGTCCGGACCGGCTGATCCATGTGCTGAACGTGGAGAAGA  
ACTACAACCTGGAGCAGACGCTGGATGACCACTCCTCCTCCATCACCGCCATCAAGTTG  
CTGGCAACAGAGACATCCAGATGATCAGCTGTGGGGCTGACAAGAGCATCTACTTTGCA  
GTGCCAGCAGGGTTCCGGATGGACTACACTTTGTCCGTACCCACCACGTAGCAGAGAAAA  
CCACCTTGTATGACATGGACATTGACATCACCCAGAAGTACGTGGCCGTGGCCTGCCAGG  
ACCGCAATGTGAGAGTCTACAACACTGTGAACGGGAAGCAGAAGAAGTGTACAAGGGCT  
CCCAGGGTGCAGAAAGGTCTTGTGAAGGTCCATGTGGACCCCTCAGGCACCTTCTG  
CCACCAGCTGCTCTGACAAAAGCATCTCAGTGATTGACTTTTACTCGGGCGAGTGCATTG  
CCAAGATGTTTGGCCATTGAGAAATTATTACCAGCATGAAGTTCACCTATGACTGTCATC  
ACTTGATCACAGTATCTGGAGACAGCTGCGTGTTCATCTGGCACCTGGGCCCCGAGATCA  
CCAACCTGCATGAAGCAGCACTTGTGGAGATTGACCACCGGCAGCAGCAGCACACAA  
ATGACAAGAAGCGGAGTGGCCACCCAGGCAGGATACGTATGTGTCCACACCTAGTGAGA  
TTCACTCCCTGAGCCCTGGAGAGCAAACAGAGGATGATCTGGAGGAAGAGTGTGAGCCAG  
AAGAGATGCTGAAGACACCATCCAAAGATAGCTTGGATCCAGATCCTCGTTGCCTGCTAA  
CCAACGGCAAGCTGCCACTGTGGGCAAAGCGGCTGCTAGGGGACGATGATGTGGCAGATG  
GCTTGGCCTTCCACGCCAAGCGCAGCTACCAGCCCCACGGCCGCTGGGCAGAGCGGGCCG  
GCCAAGAGCCCCTCAAGACCATCCTGGATGCCAGGACCTGGATTGCTACTTTACCCCCA  
TGAAGCCCAGAGTCTGGAGAACTCCATTCTGGATTCACTGGAGCCACAGAGCCTGGCCA  
GCCTGCTGAGTGTGAGTCAAGAGTCCCCAGGAAGCTGGCCGCGGGCACCCCTCCTTCTGC  
CCCAGCAGAAGGAATCATCTGAGGCCAGTGTGAGCTCATCCTCTACTCTCTGGAGGCAGAAG  
TGACAGTCAAGGGACAGACAGCCAGTATTGCAGGAAGGAGGTGGAGGCCGGGCTGGAG  
ACCAGCAGGGCGACTCCTACCTCAGGGTGTCTCCGACAGCCCAAAGGACCAGAGCCCGC  
CTGAGGACTCGGGGGAGTCAAGAGCCGACCTGGAGTGCAGCTTTCGACGCCATCCACTCCC  
CAGCTCCGCTCCTGACCCTGCCCCCTCGGTTTGGCACGTGCTGCCCCATTTCCAGGAT  
GCGCAGGTCCCACAGAAGATGAGCTGTCCCTGCCCGAGGGACCCAGCGTCCCCAGCAGCT  
CCCTACCCAGACTCCGGAGCAGGAGAAGTTCTCCGCCACCACTTTGAGACACTGACTG  
AGTCCCCCTGCAGAGAGCTCTTCCCCGAGCTCTGGGAGACGTGGAGGCCTCTGAAGCTG  
AAGACCACTTCTTCAACCCACGCCTGAGTATCTCCACGCAGTTCTCTCAAGCCTCCAGA  
AGGCATCCAGGTTACCCATACCTTCCCTCCCCGGGCAACCCAGTGCCTTGTGAAGTCTC



CAGAGGTCAAGCTCATGGACCGAGGCGGAAGCCAGCCCAGAGCAGGTAAGTGGCTACGCCT  
CCCCAGACAGGACCCACGTCTCGCTGCAGGGAAGGCTGAAGAGACCCTGGAGGCCTGGC  
GCCCACCACCTCCCTGCCTTACGAGCCTGGCGTCTGTGTCCCTGCTTCCCTCCGTGCTGC  
CCACAGACAGGAATCTCCAACGCCACATCTGCACCCACCCAGGCCTGGCTCAGGGTG  
TCCATGCCCCCTCCACCTGTTTCTACATGGAGGCCACTGCCAGCTCCCGTGCCAGGATAT  
CACGCAGCATCTCCCTCGGTGACAGTGAGGGCCCTATCGTGGCCACACTGGCCCAGCCCC  
TCCGTAGGCCATCGTCCGTTGGGGAGCTGGCCTCCTTGGGCCAGGAGCTTCAGGCCATCA  
CCACCGCGACAACACCCAGTTTGGACAGTGAGGGCCAAGAGCCTGCCCTGCGTTCCTGGG  
GCAACCACGAGGCCCCGGGCCAACCTGAGACTGACCCTGTCAAGTGCCTGTGATGGGCTCC  
TGCAGCCCCCGTGGATACCCAGCCTGGCGTACCCTCCCTGCAGTGAGCTTCCCAGCCC  
CTAGCCCTGTGGAAGAGACGCCCTGAGGCTCCACGGCTCTGCCTTTGCCCCAAGTCTCC  
CAGCTCCTGAGTCCCCTGGCCTTCTGCCCCACCCAGTAACCCCCAGCTTCCAGAGGCC  
GGCCTGGCATCCCTGGCGGCACTGCCTCCCTCCTGGAGCCACCTCCGGTGCCTTGGTC  
TGTTACAGGGCAGCCCTGCCCGCTGGAGTGAGCCCTGGGTGCCGGTTGAAGCCCTGCCCC  
CATCTCCCCTTGGAGCTGAGCAGGGTGGGGAACATCTTGCACAGGCTGCAGACCACCTTCC  
AAGAAGCCCTCGACCTTTACCGTGTGTTGGTCTCCAGTGGCCAGGTGGACACCGGGCAGC  
AGCAGGCACGACTGAGCTGGTCTCCACCTTCTGTGGATCCACAGCCAGCTGGAGGCTG  
AATGCCTGGTGGGGACTAGTGTGGCCCCAGCCAGGCTCTGCCAGCCAGGACCCCCGT  
CCCCACCGACGCTGTACCCCTGGCCAGCCAGACCTGCAGGCCCTGCTGGAACACTACT  
CGGAGCTGCTGGTGCAGGCCGTGCGGAGGAAGGCACGGGGGCACTGAGGGCGCAGCCCCT  
CCACCGCAGCCCTGCTGCTTCTGAGGACTTAGGTATTTTAAGCGAATAAACTGACAGCTT  
TG

>Neandertals\_WDR62

AGGGGATGTAACGGTGCAGCCGCCTCCGGCGTGACGATGGCGGCCGTAGGGTCCGGAGGCT  
ATGCGCGGAACGATGCAGGGGAGAAGCTGCCCTCTGTGCATGGCGGGAGTTCCGGCGCGGA  
GGGGCCAGTCTCCCGCCCCCGCCCCACCAATCTGCCTACGGCGGGCGGACGCGACTCT  
CGACGCCCTCCGAGGAGAGCGGTGCAGAACCAGGATCACTCGAGAAGGTGCTTGGCATCA  
CAGCCCCAGAACAGACTGGCCTAACCTGTGACCCCGGCACAGGCCATGTGGCCTACCTGG  
CAGGCTGTGTGGTGGTGAATTTGGACCCCAAGGAGAACAAGCAGCAGCACATCTTTAACA  
CCGCCAGGAAGTCTCTCAGTGCTCTGGCCTTCTCCCCTGATGGGAAGTACATAGTGACAG  
GGGAGAATGGGCATAGGCCTGCTGTGCGCATCTGGGATGTGGAGGAGAAGAATCAGGTGG  
CGGAGATGCTAGGCCACAAGTATGGTGTGGCGTGTGTGGCCTTCTCACCCAATATGAAGC  
ACATCGTGTCCATGGGCTACCAACATGACATGGTGTCAACGTCTGGGACTGGAAGAAAG  
ACATCGTAGTGGCCTCCAACAAGGTATCTTGTAGAGTCATTGCCCTCTCCTTCTCAGAGG  
ACAGCAGCTATTTTGTCACTGTTGGGAACCGCCATGTGAGGTTCTGGTTCTTGGAAAGTCT  
CCACTGAGACAAAGGTGACGAGCACAGTGCCCTTGTAGGGCGCTCGGGCATCCTGGGCG  
AGCTGCACAACAACATCTTCTGTGGTGTGGCCTGCGGTGCGGGCCGGATGGCGGGCAGTA  
CCTTCTGTGTCTACTCGGGCCTCCTCTGCCAGTTCAATGAGAAGAGGGTGTGGAGA  
AGTGGATCAACCTGAAGGTCTCCCTGTCTTCTGCCTCTGTGTGAGCCAGGAGCTCATCT  
TCTGTGGCTGCACAGATGGGATAGTCCGCATCTTCCAGGCCCATAGCCTGCACTACCTCG  
CCAACCTGCCCAAGCCACACTACCTTGGGGTAGACGTGGCACAGGGCCTGGAGCCCAGCT  
TCCTCTTCCACAGGAAGGCGGAAGCAGTCTACCCAGATACAGTGGCACTGACCTTCGACC  
CCATCCACCAGTGGCTGTCTGCGTGTATAAGGACCACAGCATCTACATCTGGGATGTCA  
AGGACATCAACAGAGTGGGCAAGGTGTGGTCAAGACTCTTCCACAGCTCCTACGTTTGGGA  
ACGTGGAGGTGTATCCTGAGTTTGAAGACCAGAGAGCTTGTGGCCATCAGGATCCTTTC  
TGACTTGTCTTTCAGACAACACCATTGCTTCTGGAACCTTGGACAGCAGCCCTGATTCTC  
ACTGGCAGAAAAACATCTTCAAGCAATACCCTGCTGAAGGTGCTGTACGTGGAGAATGACA  
TCCAGCACCTGCAGGACATGTCAACTTCCAGACCGGGGAGCGAGAATGGGACACCCA  
TGGACGTGAAAGCCGGGGTGCAGGTCATGCAGGTCAGTCTGACGGCCAGCATTGGCTT  
CAGGCGACCGAAGTGGAAATCTGAGGATCCACGAGCTGCACCTCATGGACGAGCTGGTCA  
AGGTGGAGGCCCATGATGCTGAGGTGCTGTGCCTGGAGTACTCCAAGCCAGAGACGGGGC  
TGACCTTGGCTGGCCTCAGCCAGTGGGACCGGCTGATCCATGTGCTGAACGTGGAGAAGA  
ACTACAACCTGGAGCAGACGCTGGATGACCACTCCTCCTCCATCACCGCCATCAAGTTCG  
CTGGCAACAGAGACATCCAGATGATCAGCTGTGGGGCTGACAAGAGCATCTACTTTCGCA  
GTGCCACAGCAGGGTTCCGATGGACTACACTTTGTCCGTACCCACCACGTAGCAGAGAAAA  
CCACCTTGTATGACATGGACATTGACATCACCCAGAAGTACGTGGCCGTGGCCTGCCAGG

ACCGCAATGTGAGAGTCTACAACACTGTGAACGGGAAGCAGAAGAAGTGCTACAAGGGCT  
CCCAGGGTGACGAAGGGTCCCTTGCTGAAGGTCCATGTGGACCCCTCAGGCACCTTCCTGG  
CCACCAGCTGCTCTGACAAAAGCATCTCAGTGATTGACTTTTACTCGGGCGAGTGCATTG  
CCAAGATGTTTGGCCATTGAGAAATTATTACCAGCATGAAGTTCACCTATGACTGTCATC  
ACTTGATCACAGTATCTGGAGACAGCTGCGTGTTTCATCTGGCACCTGGGCCCCGGAGATCA  
CCAAGTGCATGAAGCAGCACTTGCTGGAGATTGACCACCGGCAGCAGCAGCAGCACACAA  
ATGACAAGAAGCGGAGTGGCCACCCCAGGCAGGATACGTATGTGTCCACACCTAGTGAGA  
TTCACTCCCTGAGCCCTGGAGAGCAAACAGAGGATGATCTGGAGGAAGAGTGTGAGCCAG  
AAGAGATGCTGAAGACACCATCCAAAGATAGCTTGGATCCAGATCCTCGTTGCCTGCTAA  
CCAACGGCAAGCTGCCACTGTGGGCAAAGCGGCTGCTAGGGACGATGATGTGGCAGATG  
GCTTGGCCCTCCACGCCAAGCGCAGTACCAGCCCCACGGCCGCTGGGCAGAGCGGGCCG  
GCCAAGAGCCCCCTCAAGACCATCCTGGATGCCAGGACCTGGATTGCTACTTTACCCCCA  
TGAAGCCCCGAGAGTCTGGAGAACTCCATTCTGGATTCACTGGAGCCACAGAGCCTGGCCA  
GCCTGCTGAGTGAGTCAGAGAGTCCCCAGGAAGCTGGCCGCGGGCACCCCTCCTTCCTGC  
CCCAGCAGAAGGAATCATCTGAGGCCAGTGAGCTCATCCTCTACTCTCTGGAGGCAGAAG  
TGACAGTACAGGGACAGACAGCCAGTATTGCAGGAAGGAGGTGGAGGCCGGGCCTGGAG  
ACCAGCAGGGCGACTCCTACCTCAGGGTGTCTCCGACAGCCCAAAGGACCAGAGCCCCG  
CTGAGGACTCGGGGGAGTCAGAGGCCGACCTGGAGTGCAGCTTCGCAGCCATCCACTCCC  
CAGCTCCGCTCCTGACCCTGCCCCCTCGTTTTGCCACGTGCTGCCCATTTCCAGGAT  
GCGCAGGTCCACAGAAGATGAGCTGTCCCTGCCCGAGGGACCCAGCGTCCCCAGCAGCT  
CCCTACCCAGACTCCGGAGCAGGAGAAGTTCTCCGCCACCACTTTGAGACACTGACTG  
AGTCCCCCTGCAGAGAGCTCTTCCCCGAGCTCTGGGAGACGTGGAGGCCTCTGAAGCTG  
AAGACCACTTCTTCAACCCACGCCTGAGTATCTCCACGCAGTTCTCTCAAGCCTCCAGA  
AGGCATCCAGGTTACCCATACCTTCCCTCCCCGGGCAACCCAGTGCCTTGTGAAGTCTC  
CAGAGGTCAAGCTCAGGGACCGAGGCGGAAGCCAGCCCAGAGCAGGTAAGGCTACGCCT  
CCCCAGACAGGACCCACGTCTCGCTGCAGGGAAGGCTGAAGAGACCCTGGAGGCCTGGC  
GCCCACCACCTCCCTGCCTTACGAGCCTGGCGTCTGTGTCCCTGCTTCCCTCCGTGCTGC  
CCACAGACAGGAATCTCCCAACGCCACATCTGCACCCACCCAGGCCTGGCTCAGGGTG  
TCCATGCCCCCTCCACCTGTTCTACATGGAGGCCACTGCCAGCTCCCGTGCCAGGATAT  
CACGCAGCATCTCCCTCGGTGACAGTGAGGGCCCTATCGTGGCCACACTGGCCCAGCCCC  
TCCGTAGGCCATCGTCCGTTGGGGAGCTGGCCCTCTGGGCCAGGAGCTTCAGGCCATCA  
CCACCGCACAACACCCAGTTTTGGACAGTGAGGGCCAAGAGCCTGCCCTGCGTTCTGGG  
GCAACCACGAGGCCCGGGCCAACCTGAGACTGACCCTGTCAAGTGCCTGTGATGGGCTCC  
TGCTGCCCCCGTGGATACCCAGCCTGGCGTACCCGTCCCTGCAGTGAGCTTCCCAGCCC  
CTAGCCCTGTGGAAGAGAGCGCCCTGAGGCTCCACGGCTCTGCCTTTTCGCCCAAGTCTCC  
CAGCTCCTGAGTCCCCTGGCCTTCTGCCCACCCAGTAACCCCAAGCTTCCAGAGGCC  
GGCCTGGCATCCCTGGCGGCACTGCCTCCCTCCTGGAGCCACCTCCGGTGCCTTGGTC  
TGTTCCAGGGCAGCCCTGCCCGCTGGAGTGAGCCCTGGGTGCCGTTGAAGCCCTGCCCC  
CATCTCCCCTTGGAGCTGAGCAGGGTGGGGAACATCTTGCACAGGCTGCAGACCACCTTCC  
AAGAAGCCCTCGACCTTTACCGTGTGTTGGTCTCCAGTGGCCAGGTGGACACCGGGCAGC  
AGCAGGCACGGACTGAGCTGGTCTCCACCTTCTGTGGATCCACAGCCAGCTGGAGGCTG  
AATGCCTGGTGGGGACTAGTGTGGCCCCAGCCCAGGCTCTGCCAGCCCAGGACCCCGT  
CCCCACCGACGCTGTACCCCTGGCCAGCCCAGACCTGCAGGCCCTGCTGGAACACTACT  
CGGAGCTGCTGGTGCAGGCCGTGCGGAGGAAGGCACGGGGCACTGAGGGCGCAGCCCCT  
CCACCGCAGCCCTGCTGCTTCTGAGGACTTAGGTATTTAAGCGAATAAACTGACAGCTT  
TG

>Denisovans\_WDR62

AGGGGATGTAACGGTCCCGCCCTCCGGCGTGACGATGGCGGCCGTAGGGTCCGGAGGCT  
ATGCGCGGAACGATGCAGGGGAGAAGCTGCCCTCTGTGCATGGCGGGAGTTCCGGCGCGGA  
GGGGCCAGTCCCTCCCCGCCCCCGCCCCACCAATCTGCCTACGGCGGGCGGACGCGACTCT  
CGACGGCCTCCGAGGAGACGGTGCAGAACCAGGGTGTCACTCGAGAAGGTGCTTGGCATCA  
CAGCCCAGAACAGCAGTGGCCTAACCTGTGACCCCGGCACAGGCCATGTGGCCTACCTGG  
CAGGCTGTGTGGTGGTGATTTTTGGACCCCAAGGAGAACAAGCAGCAGCACATCTTTAACA  
CCGCCAGGAAGTCTCTCAGTGCTCTGGCCTTCTCCCCTGATGGGAAGTACATAGTGACAG  
GGGAGAATGGGCATAGGCCTGCTGTGCGCATCTGGGATGTGGAGGAGAAGAATCAGGTGG  
CGGAGATGCTAGGCCACAAGTATGGTGTGGCGTGTGTGGCCTTCTACCCAATATGAAGC

ACATCGTGTCCATGGGCTACCAACATGACATGGTGTCTCAACGTCTGGGACTGGAAGAAAG  
ACATCGTAGTGGCCTCCAACAAGGTATCTTGTAGAGTCATTGCCCTCTCCTTCTCAGAGG  
ACAGCAGCTATTTTGTCACTGTTGGGAACCGCCATGTGAGGTTCTGGTTCTTGAAGTCT  
CCACTGAGACAAAGGTGACGAGCACAGTGCCCTTGTAGGGCGCTCGGGCATCCTGGGCG  
AGCTGCACAACAACATCTTCTGTGGTGTGGCCTGCGGTGCGGGCCGGATGGCGGGCAGTA  
CCTTCTGTGTGTCTACTCGGGCCTCCTCTGCCAGTTCAATGAGAAGAGGGTGTGGAGA  
AGTGGATCAACCTGAAGGTCTCCCTGTCTTCTGCCTCTGTGTGACGCCAGGAGCTCATCT  
TCTGTGGCTGCACAGATGGGATAGTCCGCATCTTCCAGGCCCATAGCCTGCACTACCTCG  
CCAACCTGCCAAGCCACACTACCTTGGGGTAGACGTGGCACAGGGCCTGGAGCCCAGCT  
TCCTCTTCCACAGGAAGCGAAGCAGTCTACCCAGATACAGTGGCACTGACCTTCGACC  
CCATCCACCAGTGGTGTCTGCGTGTATAAGGACCACAGCATCTACATCTGGGATGTCA  
AGGACATCAACAGAGTGGGCAAGGTGTGGTCAAGAGCTCTTCCACAGCTCCTACGTTTGA  
ACGTGGAGGTGTATCCTGAGTTTGAAGACCAGAGAGCTTGTGGCCATCAGGATCCTTTC  
TGACTTGTCTTTCAGACAACACCATTGCTTCTGGAACCTGGACAGCAGCCCTGATTCTC  
ACTGGCAGAAAAACATCTTCCAGCAATACCCTGCTGAAGGTGCTGTACGTGGAGAATGACA  
TCCAGCACCTGCAGGACATGTCACTTCCAGACCGGGGAGCGAGAATGGGACACCCA  
TGGACGTGAAAGCCGGGTGCGGTTCATGCAGGTGAGTCTGACGGCCAGCATTGGCTT  
CAGGCGACCGAAGTGGAAATCTGAGGATCCACGAGCTGCACCTCATGGACGAGCTGGTCA  
AGGTGGAGGCCCATGATGCTGAGGTGCTGTGCCTGGAGTACTCCAAGCCAGAGACGGGGC  
TGACCTTGGCTGGCCTCAGCCAGTGGGACCGGCTGATCCATGTGCTGAACGTGGAGAAGA  
ACTACAACCTGGAGCAGACGCTGGATGACCACTCCTCCTCCATCACCGCCATCAAGTTG  
CTGGCAACAGAGACATCCAGATGATCAGCTGTGGGGCTGACAAGAGCATCTACTTTCGCA  
GTGCCCAGCAGGGTTCCGGATGGACTACACTTGTCCGTACCCACCACGTAGCAGAGAAAA  
CCACCTTGTATGACATGGACATTGACATCACCCAGAAGTACGTGGCCGTGGCCTGCCAGG  
ACCGCAATGTGAGAGTCTACAACACTGTGAACGGGAAGCAGAAGAAGTGTACAAGGGCT  
CCCAGGGTGCAGAGGGTCTTGTGTAAGGTCCATGTGGACCCCTCAGGCACCTTCTGG  
CCACCAGCTGCTCTGACAAAAGCATCTCAGTGAATTGACTTTTACTCGGGCGAGTGCATTG  
CCAAGATGTTTGGCCATTGAGAAATTATTACCAGCATGAAGTTACCTATGACTGTCATC  
ACTTATGATCAGATCTGGAGACAGTGCCTGTTTATCTGGCACCTGGGCCCCGAGATCA  
CCAAGTGCATGAAGCAGCACTTGTGGAGATTGACCACCGGCAGCAGCAGCAGCACACAA  
ATGACAAGAAGCGGAGTGGCCACCCAGGCAGGATACGTATGTGTCCACACCTAGTGAGA  
TTCACTCCCTGAGCCCTGGAGAGCAAACAGAGGATGATCTGGAGGAAGAGTGTGAGCCAG  
AAGAGATGCTGAAGACACCATCCAAAGATAGCTTGGATCCAGATCCTCGTTGCCTGCTAA  
CCAACGGCAAGCTGCCACTGTGGGCAAAGCGGCTGCTAGGGGACGATGATGTGGCAGATG  
GCTTGGCCTTCCACGCCAAGCGCAGCTACCAGCCCCACGGCCGCTGGGCAGAGCGGGCCG  
GCCAAGAGCCCCCAAGACCATCCTGGATGCCAGGACCTGGATTGCTACTTTACCCCA  
TGAAGCCCCGAGAGTCTGGAGAACTCCATTCTGGATTACTGGAGCCACAGAGCCTGGCCA  
GCCTGCTGAGTGTGAGTCAAGAGTCCCCAGGAAGCTGGCCGCGGGCACCCCTCCTTCTGC  
CCCAGCAGAAGGAATCATCTGAGGCCAGTGTGAGCTCATCCTCTACTCTCTGGAGGCAGAAG  
TGACAGTCAAGGGACAGACAGCCAGTATTGCAGGAAGGAGGTGGAGGCCGGGCTGGAG  
ACCAGCAGGGCGACTCCTACCTCAGGGTGTCTCCGACAGCCAAAGGACCAGAGCCCCG  
CTGAGGACTCGGGGGAGTCAAGAGCCGACCTGGAGTGCAGCTTCCGACGCCATCCACTCCC  
CAGCTCCGCTCCTGACCCTGCCCCCTCGGTTTGGCACGTGCTGCCCCATTTCCAGGAT  
GCGCAGGTCCCACAGAAGATGAGCTGTCCCTGCCCGAGGGACCCAGCGTCCCCAGCAGCT  
CCCTACCCAGACTCCGGAGCAGGAGAAGTTCCCTCCGCCACCACTTTGAGACACTGACTG  
AGTCCCCCTGCAGAGACTCTTCCCCGACGCTCTGGGAGACGTGGAGGCCTCTGAAGCTG  
AAGACCACTTCTTCAACCCACGCTGAGTATCTCCACGCAGTTCTCTCAAGCCTCCAGA  
AGGCATCCAGGTTCAACCCATACCTTCCCTCCCCGGGCAACCCAGTGCCTTGTGAAGTCTC  
CAGAGGTCAAGCTCATGGACCGAGGCGGAAGCCAGCCCAGAGCAGGTAAGGCTACGCCT  
CCCCAGACAGGACCCACGTCTCGCTGCAGGGAAGGCTGAAGAGACCCTGGAGGCCTGGC  
GCCCACCACCTCCCTGCCTTACGAGCCTGGCGTCTGTGTCCCTGCTTCTCCGTGCTGC  
CCACAGACAGGAATCTCCAACGCCACATCTGCACCCACCCAGGCCTGGCTCAGGGTG  
TCCATGCCCCCTCCACTGTTTCTACATGGAGGCCACTGCCAGCTCCCGTCCAGGATAT  
CACGCAGCATCTCCCTCGGTGACAGTGGGGCCCTATCGTGGCCACACTGGCCCAGCCCC  
TCCGTAGGCCATCGTCCGTTGGGGAGCTGGCCTCCTTGGGCCAGGAGCTTCAGGCCATCA  
CCACCGGACAACACCCAGTTTGGACAGTGGGGCCAAGAGCCTGCCCTGCGTTCTGGG  
GCAACCACGAGGCCCGGGCCAACCTGAGACTGACCCTGTCAAGTGCCTGTGATGGGCTCC

TGCTGCCCCCGTGGATAACCCAGCCTGGCGTCACCGTCCCTGCAGTGAGCTTCCCAGCCC  
CTAGCCCTGTGGAAGAGAGCGCCCTGAGGCTCCACGGCTCTGCCTTTTCGCCCAAGTCTCC  
CAGCTCCTGAGTCCCCTGGCCTTCTGCCCACCCAGTAACCCCCAGCTTCCAGAGGCCC  
GGCCTGGCATCCCTGGCGGCACTGCCTCCCTCCTGGAGCCACCTCCGGTGCACCTGGTC  
TGTTCCAGGGCAGCCCTGCCCGCTGGAGTGAGCCCTGGGTGCCGGTTGAAGCCCTGCCCC  
CATCTCCCCTTGAGCTGAGCAGGGTGGGGAACATCTTGACAGGCTGCAGACCACCTTCC  
AAGAAGCCCTCGACCTTTACCGTGTGTTGGTCTCCAGTGGCCAGGTGGACACCCGGGCAGC  
AGCAGGCACGGACTGAGCTGGTCTCCACCTTCTGTGGATCCACAGCCAGCTGGAGGCTG  
AATGCCTGGTGGGGACTAGTGTGGCCCCAGCCAGGCTCTGCCAGCCAGGACCCCGT  
CCCCACCGACGCTGTACCCCTGGCCAGCCAGACCTGCAGGCCCTGCTGGAACACTACT  
CGGACTGCTGGTGCAGGCCGTGCGGAGGAAGGCACGGGGGCACTGAGGGCGCAGCCCT  
CCACCGCAGCCCTGCTGCTTCTGAGGACTTAGGTATTTTAAGCGAATAAACTGACAGCTT  
TG

>Pan paniscus\_WDR62 (XM\_003816089.1)

CACATAGTTCCTCTAGGTGGCGCAAAAACCGAGGTGAGGCGGCCGTGGCCTTAGCCTCG  
TAAAAATTTAAACCTGTATGTTTCAGCGAATAATGAAAACGCAGTCTGGATGAAAGACCCC  
ATGACGCTTAATCAGGCATCCAGTACACTGGCTGTGGCCCCGCCCGCCAGGTACTCGCTC  
CGCTCTTCGCCCCATTGGTTCTAAGCGCCGCCCGGCATCCCTGCGATTGGCTAGGCCGG  
GCCCCGTCGCTCCAATAGGCGGTGGCGCCGGCTTTCCCGCGGCTGTTGCTGTTCCAGTGG  
GTCGTGGCGGTGGCGGCAGCGGCGGTTAGGGGATGTAACGGTCGCCCGGCTGCGGCGTGAC  
GATGGCGGCCGTAGGGTCCGGAGGCTATGCGCGGAACGATGCAGGGGAGAAGCTGCCCTCT  
GTCATGGCGGGAGTTCCGGCGCGGAGGGGCCAGTCTCCCCGCCCCCGCCCCACCAATCT  
GCCTACGGCGGGCAGCGACTCTCGACGGCCTCCGAGGAGACGGTGCAGAACCAGGGTGT  
ACTCGAGAAGGTGCTTGGCATCACAGCCAGAACAGCAGTGGCCTAACCTGTGACCCACAGC  
ACAGGCCATGTGGCCTACCTGGCAGGCTGTGTGGTGGTGATTTTGGACCCCAAGGAGAACA  
AGCAGCAGCACATCTTTAACACCGCCAGGAAGTCTCTCAGTGTCTTGGCCTTCTCCCCTGA  
TGGGAAGTACATAGTGACAGGGGAGAATGGGCATAGGCCCTGCTGTGCGCATCTGGGATGTG  
GAGGAGAAGAATCAGGTGGCGGAGATGCTAGGCCACAAGTATGGTGTGGCGTGTGTGGCT  
TCTCACCAATATGAAGCACATCGTGTCCATGGGCTACCAACATGACATGGTGTCAACGT  
CTGGGACTGGAAGAAAGACATCGTAGTGGCCTCCAACAAGGTATCTTGTAGAGTCATTGCC  
CTCTCCTTCTCAGAGGACAGCAGCTATTTTGTCACTGTTGGGAACCGGCATGTGAGGTTCT  
GGTCTTGGAAAGTCTCCACTGAGACAAAGGTGACGAGCACAGTGGCCCTTGTAGGGCGCTC  
GGGCATCCTGGGCGAGCTGCACAACAACATCTTCTGTGGTGTGGCCTGCGGTGCGGGCCGG  
ATGGCGGGCAGTACCTTCTGTGTGTCTACTCGGGCCTCCTCTGCCAGTTCAATGAGAAGA  
GGGTGCTGGAGAAGTGGATCAACCTGAAGGTCTCCCTGTCTTCTGCCTCTGTGTGAGCCA  
GGAGCTCATCTTCTGTGGCTGCACAGATGGGATAGTCCGCATCTTCCAGGCCCATAGCCTG  
CACTACCTCGCCAACCTGCCAAGCCACACTACCTTGGGGTAGACGTGGCACAGGGCCTGG  
AGCCAGCTTCTCTTCCACAGGAAGGCGGAAGCAGTCTACCCAGATACAGTGGCACTGAC  
CTTGCACCCCATCCACCAGTGGCTGTCTGCGTGTATAAGGACCACAGCATCTACATCTGG  
GATGTCAAGGACATCAACGGAGTGGGCAAGGTGTGGTGCAGAGCTCTTCCACAGCTCCTAC  
GTTTGGAAACGTGGAGGTGTATCCTGAGTTTGAAGACCAGAGAGCTTGTGTTGCCATCAGGA  
TCCTTTCTGACTTGTCTTTCAGACAACACCATTTCGCTTCTGGAACCTGGACAGCAGCCCT  
GATTCTCACTGGCAGAAAAACATCTTTCAGCAATACCCTGCTGAAGGTGCTGTACGTGGAG  
AATGACATCCAGCACCTGCAGGACATGTACACTTCCCAGACCGAGGGAGCGAGAATGGG  
ACACCCATGGACGTGAAAGCCGGGGTGCGGGTGATGCAGGTGAGTCTGACGGCCAGCAT  
TTGGCTTTCAGGCGACCGAAGTGGAAATCTGAGGATCCACGAGCTGCACTTTCATGGACGAG  
CTGGTCAAGGTGGAGGCCCATGATGCTGAGGTGCTGTGCTGAGTACTCCAAGCCAGAG  
ACGGGGCTGACCTTGTGGCCTCAGCCAGTCCGGACCGGCTGATCCATGTGCTGAACGTG  
GAGAAGAATAACAACCTGGAGCAGACGCTGGATGACCCTCCTCCTCCATCACCGCCATC  
AAGTTGCTGGCAACAGAGACATCCAGATGATCAGCTGTGGGGCTGACAAGAGCATCTAC  
TTTTCGAGTGGCCAGCAGGGTTCGGATGGACTACACTTTGTCCGTACCCACCACGTAGCA  
GAGAAAACCACCTTGTATGACATGGACATTGACATCACCCAGAAGTACGTGGCCGTGGCC  
TGCCAGGACCGCAATGTGAGAGTCTACAACACTGTGAACGGGAAGCAGAAGAAGTGCTAC  
AAGGGCTCCCAGGGTGACGAAGGGTCTTGTGCTGAAGGTCCATGTGGACCCCTCAGGCACC  
TTCCTGGCCACCAGCTGCTCTGACAAAAGCATCTCAGTGATTGACTTTTACTCGGGCGAG  
TGCATTGCCAAGATGTTTGGCCATTGAGAAATTATTACCAGCATGAAGTTCACCTATGAC

TGTCATCACTTGATCACAGTATCTGGAGACAGCTGCGTGTTTCATCTGGCACCTGGGCCCC  
GAGATCACCAACTGCATGAAGCAGCACTTGCTGGAGATTGACCACCGGCAGCAGCAGCAG  
CACACAAATGACAAGAAGCGGAGCGGCCACCCAGGCAGGATACGTATGTGTCCACACCT  
AGTGAGATTGCTCCCTGAGCCCTGGAGAGCAAACAGAGGATGATCTGGAGGAAGAGTGT  
GAGCCAGAAGAGATGCTGAAGACACCATCCAAAGATAGCTTGGATCCAGATCCTCGTTGC  
CTGCTAACCAACGGCAAGCTGCCACTGTGGGCAAAGCGGCTGCTAGGGGACGATGATGTG  
GCAGATGGCTCGGCCTTCCACGCCAAGCGCAGCTACCAGCCCCACGGCCGCTGGGCAGAG  
CGGGCCGGCCAAGAGCCCCCTCAAGACCATCCTGGATGCCCAGGACCTGGATTGCTACTTT  
ACCCCCATGAAGCCCGAGAGTCTGGAGAACTCCATTCTGGATTCACTGGAGCCACAGAGC  
CTGGCCAGCCTGCTGAGTGAGTCAGAGAGTCCCCAGGAAGCTGGCCGCGGGCACCCCTCC  
TTCTTGCCCCCAGCAGAAGGAATCATCTGAGGCCAGTGAGCTCATCCTCTACTCTCTGGAG  
GCAGAAGTGACAGTCACAGGGACAGACAGCCAGTATTGCAGGAAGGAGGTGGAGGCCGGG  
CCTGGAGACCAGCAGGGCGACTCCTACCTCAGGGTGTCTCCGACAGCCCAAAGGACCAG  
AGCCCCGCTGAGGACTCGGGGGAGTCAGAGGCCGACCTGGAGTGCAGCTTCGCAGCCATC  
CACTCCCCAGCTCCGCCTCCTGACCCTGCCCTCGGTTTGCCACGTCACTGCCCCATTTTC  
CCAGGATGCGCAGGTCCCACAGAAGATGAGCTGTCCCTGCCCGAGGGACCCAGCGTCCCC  
AGCAGCTCCCTACCCAGACTCCGGAGCAGGAGAAGTTCTCCGCCACCACTTTGAGACA  
CTGACTGAGTCCCCCTGCAGAGAGCTCTTCCCCGAGCTCTGGGAGACGTGGAGGCCTCT  
GAAGCTGAAGACTACTTTTCAACCCACGCCTGAGCATCTCCACGCAGTTCTCTCAAGC  
CTCCAGAAGGCATCCAGGTTACCCATACCTTCCCTCCCCGGGCAACCCAGTGCCTTGTC  
AAATCTCCAGAGGTCAAGCTCATGGACCGAGGCGGAAGCCAGCCAGAGCAGGTACTGGC  
TACGCCTCCCCAGACAGTACCCACGTCTCGCTGCAGGGAAGGCTGAAGAGACCCTGGAG  
GCCTGGCACCCACCACCTCCCTGCCTTACGAGCCTGGCGTCTGTGTCCCTGCTTCCCTCC  
GTGCTGCCACAGACAGGAATCTCCCAACGCCACATCTGCACCCACCCAGGCCTGGCT  
CAGGGTGTCCATGCCCCCTCCACCTGTTCTACATGGAGGCCACTGCCAGCTCCCCGTGCC  
AGGATATCACGCAGCATCTCCCTCGGTGACAGTGAGGGCCCTATCGTGGCCACACTGGCC  
CAGCCCCCTCCGTAGGCCATCGTCCGTTGGGGAGCTGGCCTCCTTGGGCCAGGAGCTTCAG  
GCCATCACCCACCCCAACACCACCCAGTTTGGACAGTGAGGGCCAAGAGCCTGCCCTGCCT  
TTCTGGGGCAACCCAGGCCCCGGGCCAACCTGAGACTGACCCTGTCAAGTGTCTGTGAT  
GGGCTCCTGCTGCCCCCCGTGGATAACCCAGCCTGGCGTACCCTCCCTGCAGTGAGCTTC  
CCAGCCCCCTAGCCCTGTGGAAGAGAGCGCCCTGAGGCTCCACGGCTCTGCCTTTACCCA  
AGTCTCCCAGCTCCTGAGTCCCCTGGCCTTCTGCCACCCACAGTAACCCCCAGCTTCCA  
GAGGCCGGGCTGGCGTCCCTGGCGGCACTGCCTCCCTCCTGGAGCCCACCTCCGGTGCA  
CTTGGTCTGTTCCAGGGCAGCCCTGCCCGCTGGAGTGAGCCCTGGGTGCCGGTTGAAGCC  
CTGTCCCCATCTCCCCTTGAGCTGAGCAGGGTGGGGAACATCTTGCACAGGCTGCAGACC  
ACCTTCCAAGAAGCCCTCGACCTTTACCGTGTGTTGGTCTCCAGTGGCCAGGTGGACACC  
GGGCAGCAGCAGGCACGGACTGAGCTGGTCTCCACCTTCTGTGGATCCACAGCCAGCTG  
GAGGCTGAATGCCTGGTGGGGACTAGTGTGGCCCCAGCCAGGCTCTGCCAGCCAGGA  
CCCCCGACCCACCAGCCTGTACCCCTGGCCAGCCAGACCTGCAGGCCCTGCTGGAA  
CACTACTCGGAGCTGCTGGTGCAGGCCGTGCGGAGGAAGGCACGGGGGCACTGAGGGCGC  
AGCCCCCTCCACCGCAGCCCTGCTGCTTCTGAGGACTTAGGTATTTTAAGCGAATAAACTG  
ACAGCTTTGAGGAATG

>Pan troglodytes\_WDR62 (ENSPTRT\_20162)

TTTCCCGCGGCTGTTTCGCTGTTCCAGTGGGTGCTGGCGCTGGCGGCAGCGGCGGTTAGGG  
GATGTAACGGTCGCCCGGCTCCGGCGTGACGATGGCGGCCGTAGGGTCCGGAGGCTATGC  
GCGGAACGATGCAGGGGAGAAGCTGCCCTCTGTTCATGGCGGGAGTTCCGGCGCGGAGGGG  
CCAGTCTCCCCGCCCCCGCCCCACCAATCTGCCTACGGCGGCGGACCGGACTCTCGAC  
GGCCTCCGAGGAGACGGTGCAGAACCAGGTTGCTCACTCGAGAAGGTGCTTGGCATCACAGC  
CCAGAACAGCAGTGGCCTAACCTGTGACCCAGCACAGGCCATGTGGCCTACCTGGCAGG  
CTGTGTGGTGGTGATTTTGGACCCCAAGGAGAACAAGCAGCAGCACATCTTTAACCCGC  
CAGGAAGTCTCTCAGTGCTCTGGCCTTCTCCCCTGATGGGAAGTACATAGTGACAGGGGA  
GAATGGGCATAGGCCTGCTGTGCGCATCTGGGATGTGGAGGAGAAGAATCAGGTGGCGGA  
GATGCTAGGCCACAAGTATGGTGTGGCGTGTGTGGCCTTCTCACCCAATATGAAGCACAT  
CGTGTCCATGGGCTACCAACATGACATGGTGTCAACGTCTGGGACTGGAAGAAAGACAT  
CGTAGTGGCCTCCAACAAGGTATCTTGTAGAGTCATTGCCCTCTCCTTCTCAGAGGACAG  
CAGCTATTTTGTCACTGTTGGGAACCGGCATGTGAGGTTCTGTTTCTTGAAGTCTCCAC

TGAGACAAAGGTGACGAGCACAGTGCCCCCTTGTAGGGCGCTCGGGCATCCTGGGCGAGCT  
GCACAACAACATCTTCTGTGGTGTGGCCTGCGGTGCGGGCCGGATGGCGGGCAGTACCTT  
CTGCGTGTCTACTCGGGCCTCCTCTGCCAGTTCAATGAGAAGAGGGTGTGGAGAAGTG  
GATCAACCTGAAGGTCTCCCTGTCTTCTGCCTCTGTGTGAGCCAGGAGCTCATCTTCTG  
TGGCTGCACAGATGGGATAGTCCGCATCTTCCAGGCCATAGCCTGCACTACCTCGCCAA  
CCTGCCCAAGCCACACTACCTTGGGGTAGACGTGGCACAGGGCCTGGAGCCCAGCTTCT  
CTTCCACAGGAAGGCGGAAGCAGTCTACCCAGATACAGTGGCACTGACCTTCGACCCCAT  
CCACCAGTGGCTGTCTGCGTGTATAAGGACCACAGCATCTACATCTGGGATGTCAAGGA  
CATCAACGGAGTGGGCAAGGTGTGGTCAAGACTCTTCCACAGCTCCTACGTTTGAAACGT  
GGAGGTGATCCTGAGTTTGAAGACCAGAGAGCTTGTGGCCATCAGGATCCTTTCTGAC  
TTGTTCTTTCAGACAACACCATTGCTTCTGGAACCTGGACAGCAGCCCTGATTCTCACTG  
GCAGAAAAACATCTTCAAGAAATACCCTGCTGAAGGTGCTGTACGTGGAGAATGACATCCA  
GCACCTGCAGGACATGTCACTTCCCAGACCGAGGGAGCGAGAATGGGACACCCATGGA  
CGTGAAAGCCGGGGTGCAGGTCATGCAGGTGAGTCTGACGGCCAGCATTGTTGCTTTCAGG  
CGACCGAAGTGGAAATCTGAGGATCCACGAGCTGCACTTCATGGACGAGCTGGTCAAGGT  
GGAGGCCCATGATGCTGAGGTGCTGTGCCTGGAGTACTCCAAGCCAGAGACGGGGCTGAC  
CTTGCTGGCCTCAGCCAGTCCGGACCGGCTGATCCATGTGCTGAACGTGGAGAAGAACTA  
CAACCTGGAGCAGACGCTGGATGACCACTCCTCCTCCATCACCGCCATCAAGTTCGCTGG  
CAACAGAGACATCCAGATGATCAGCTGTGGGGCTGACAAGAGCATCTACTTTCGAGTGC  
CCAGCAGGGTTCCGATGGACTACACTTTGTCCGTACCCACCACGTAGCAGAGAAAACCAC  
CTTGTATGACATGGACATTGACATCACCCAGAAGTACGTGGCCGTGGCCTGCCAGGACCG  
CAATGTGAGAGTCTACAACACTGTGAACGGGAAGCAGAAGAAGTGTACAAGGGCTCCCA  
GGGTGACGAAGGGTCTTGTGTAAGGTCCATGTGGACCCCTCAGGCACCTTCTGGCCAC  
CAGCTGCTCTGACAAAAGCATCTCAGTGATTGACTTTTACTCGGGCGAGTGCATTGCCAA  
GATGTTTGGCCATTGAGAAATTATTACCAGCATGAAGTTCACCTATGACTGTCATCACTT  
GATCACAGTATCTGGAGACAGCTGCGTGTTCATCTGGCATCTGGGCCCGGAGATCACCAA  
CTGCATGAAGCAGCACTTGTGGAGATTGACCACCGGCAGCAGCAGCAGCACACAAATGA  
CAAGAAGCGGAGCGGCCACCCAGGCAGGATACGTATGTGTCCACACCTAGTGAGATTG  
CTCCCTGAGCCCTGGAGAGCAAAACAGAGGATGATCTGGAGGAAGAGTGTGAGCCAGAAGA  
GATGCTGAAGACACCATCCAAAGATAGCTTGGATCCAGATCCTCGTTGCCTGCTAACCAA  
CGGCAAGCTGCCACTGTGGGCAAAGCGGCTGCTAGGGGACGATGATGTGGCAGATGGCTC  
GGCCTTCCACGCCAAGCGCAGCTACCAGCCCCACGGCCGCTGGGCAGAGCGGGCCGGCCA  
AGAGCCCCCAAGACCATCCTGGATGCCAGGACCTGGATTGCTACTTTACCCCCATGAA  
GCCCGAGAGTCTGGAGAACTCCATTCTGGATTCACTGGAGCCACAGAGCCTGGCCAGCCT  
GCTGAGTGAGTCAGAGAGTCCCCAGGAAGCTGGCCGCGGGCACCCCTCCTTCTGCCCCA  
GCAGAAGGAATCATCTGAGGCCAGTGAGCTCATCCTCTACTCTCTGGAGGCAGAAGTGAC  
AGTCACAGGGACAGACAGCCAGTATTGCAGGAAGGAGGTGGAGGCCGGGCCTGGAGACCA  
GCAGGGCGACTCCTACCTCAGGGTGTCTCCGACAGCCAAAGGACCAGAGCCCCGCCTGA  
GGACTCGGGGGAGTCAGAGGCCGACCTGGAGTGCAGCTTCGCAGCCATCCACTCCCCAGC  
TCCGCTCCTGACCCTGCCCTCGGTTTGGCCACGTCACTGCCCCATTTCCAGGATGCGC  
AGGTCCACAGAAGATGAGCTGTCCCTGCCCGAGGGACCCAGCGTCCCCAGCAGCTCCCT  
ACCCAGACTCCGGAGCAGGAGAAGTTCCTCCGCCACCACTTTGAGACACTGACTGAGTC  
CCCCTGCAGAGAGCTCTTCCCCGCAGCTCTGGGAGACGTGGAGGCCTCTGAAGCTGAAGA  
CTACTTCTTCAACCCACGCCTGAGCATCTCCACGCAGTTCTCTCAAGCCTCCAGAAGGC  
ATCCAGGTTACCCATACTTCCCTCCCCGGGCAACCCAGTGCCTTGTGAAGTCTCCAGA  
GGTCAAGCTCATGGACCGAGGCGGAAGCCAGCCCAGAGCAGGTACTGGCTACGCCTCCCC  
AGACAGGACCCACGTCTCTGCTGCAGGGAAGGCTGAAGAGACCCCTGGAGGCCTGGCACC  
ACCACCTCCCTGCCTTACGAGCCTGGCGTCTGTGTCCCTGCTTCTCCGTGCTGCCCCAC  
AGACAGGAATCTCCAACGCCACATCTGCACCCACCCAGGCCTGGCTCAGGGTGTCCA  
TGCCCCCTCCACCTGTTTCTACATGGAGGCCACTGCCAGCTCCCGTGCCAGGATATCACG  
CAGCATCTCCCTCGGTGACAGTGAGGGCCCTATCGTGGCCACACTGGCCCAGCCCCCTCCG  
TAGGCCATCGTCCGTTGGGGAGCTGGCCTCCTTGGGCCAGGAGCTTCAGGCCATCACCA  
CGCAACACCACCCAGTTTGGACAGTGAGGGCCAAGAGCCTGCCCTGCGTTCTGGGGCAA  
CCACGAGGCCCGGGCCAACCTGAGACTGACCCTGTCAAGTGTCTGTGATGGGCTCCTGCT  
GCCCCCGTGGATACCCAGCCTGGCGTACCCTCCCTGCAGTGTGACTTCCAGCCCCCTAG  
CCCTGTGGAAGAGAGCACCCTGAGGCTCCACGGCTCTGCCTTTTACCCAAGTCTCCAGC  
TCCTGAGTCCCCTGGCCTTCTGCCACCCAGTAACCCCAAGCTTCCAGAGGCCGGGCC

TGGCGTCCCTGGCGGCACTGCCTCCCTCCTGGAGCCCACCTCCGGTGCACCTTGGTCTGTT  
CCAGGGCAGCCCTGCCCCTGGAGTGAGCCCTGGGTGCCGGTTGAAGCCCTGTCCCCATC  
TCCCCTTGAGCTGAGCAGGGTGGGGAACATCTTGACAGGCTGCAGACCACCTTCCAAGA  
AGCCCTCGACCTTTACCGTGTGTTGGTCTCCAGTGGCCAGGTGGACACCGGGCAGCAGCA  
GGCACAGACTGAGCTGGTCTCCACCTTCTGTGGATCCACAGCCAGCTGGAGGCTGAATG  
CCTGGTGGGGACTAGTGTGGCCCCAGCCAGGCTCTGCCAGCCAGGACCCCCGACCCC  
ACCGACGCTGTACCCCCCTGGCCAGCCAGACCTGCAGGCCCTGCTGGAACACTACTCGGA  
GCTGCTGGTGCAGGCCGTGCGGAGGAAGGCACGGGGGCACTGAGGGCGCAGCCCCCTCCAC  
CGCAGCCCTGCTGCTTCTGAGGACTTAGGTATTTTAAGCGAATAAACTGACAGCTTTGAG  
GAATG

>Gorilla gorilla\_WDR62 (ENSGGOT\_1156)

TTTCCCGCGGCTGTTTCGCTGTTCCAGTGGGTCTGGCGGTGGCGGCAGCGCGGTTAGGG  
GATGTAACGGTGCAGCCGGCTCCGGCGTGACGATGGCGGCCGTAGGGTCCGGAGGCTATGC  
GCGGAACGATGCAGGGGAGAAGCTGCCCTCTGTTCATGGCGGGAGTTCCGGCGCGGAGGGG  
CCAGTCTTCCCGCCCCCGCCCCACCGCTCTGCCTCCGGCGGCGGACGCGACTCTCGAC  
GGCCTCCGAGGAGACGGTGCAGAACCAGGCTGACTCGAGAAGGTGCTTGGCATCACAGC  
CCAGAACAGCAGTGGACTAACCTGTGACCCCGGCGCAGGCCACGTGGCCTACCTGGCAGG  
CTGTGTGGTGGTGAATTTGGACCCCAAGGAGAACAAGCAGCAGCACATCTTTAACACCGC  
CAGGAAGTCTCTCAGTGTCTGGCCTTCTCCCCTGATGGGAAGTACATAGTGACAGGGGA  
GAATGGGCATAGGCCTGCTGTGCGCATCTGGGATGTGGAGGAGAAGAATCAGGTGGCGGA  
GATGCTAGGCCACAAGTATGGTGTGGCGTGTGTGGCCTTCTCACCAATATGAAGCACAT  
CGTGTCCATGGGCTACCAACATGACATGGTGTCAACGTCTGGGACTGGAAGAAAGACAT  
CGTAGTGGCCTCCAACAAGGTATCTTGTAGAGTCACTCGCCCTCTCCTTCTCAGAGGACAG  
CAGCTATTTTGTCACTGTTGGGAACCGGCATGTGAGGTTCTGGTTCTTGGAAGTCTCCAC  
TGAGACAAAGGTGACGAGCACAGTGCCTTGTAGGGCGCTCGGGCATCCTGGGTGAGCT  
GCACAACAACATCTTCTGTGGTGTGGCCTGCGGTCCGGGCGGATGGCAGGCAGTACCTT  
CTGTGTCTCTACTCGGCCTCCTCTGCCAGTTCAATGAGAAGAGGGTGTGGAGAAGT  
GATCAACCTGAAGTCTCCCTGTCTTCTGCTTCTGTGTGAGCCAGGAGTTCACTTCTG  
TGGCTGCACAGATGGGATAGTCCGCATCTTCCAGGCCATAGCCTGCACTACCTCGCCAA  
CCTGCCCAAGCCACACTACCTTGGGGTAGACGTGGCACAGGGCCTGGAGCCAGCTTCT  
CTTCCACAGGAAGGCGGAAGCAGTCTACCCAGATACAGTGGCACTGACCTTCGACCCCAT  
CCACCAGTGGCTGTCTGCGTGTATAAGGACCACAGCATCTACATCTGGGATGTCAAGGA  
CATCAACAAAGTGGGCAAGGTGTGGTCAAGACTCTTCCACAGCTCCTACGTTTGAATGT  
GGAGGTGTATCCTGAGTTTGAAGACCAGAGAGCTTGTGGCCATCAGGATCCTTTCTGAC  
TTGTTCTTCAGACAACACCATTGCTTCTGGAACCTGGACAGCAGCCCTGATTCTCACTG  
GCAGAAAAACATCTTCAGCAATACCCTGCTGAAGGTCTGTACGTGGAGAATGACATCCA  
GCACCTGCAGGACATGTCACTTCCAGACCGGGGAGCGAGAATGGGACACCCATGGA  
CGTGAAGCCGGGGTGCAGGTCATGCAGGTGATCCTGACGGCCAGCATTGGCTTCAGG  
CGACCGAAGTGGAAATCTGAGGATCCACGAGCTGCACCTCATGGACGAGCTGGTCAAGGT  
GGAGGCCCATGATGCTGAGGTGCTGTGCCTGGAGTACTCCAAGCCAGAGACGGGGCTGAC  
CTTGCTGGCCTCAGCCAGTCCGGACCGGCTGATCCATGTGCTGAACGTGGAGAAGAACTA  
CAACCTGGAGCAGACGCTGGATGACCACTCCTCCTCCATCACCGCCATCAAGTTCGCTGG  
CAACAGAGACATCCAGATGATCAGCTGTGGGGCTGACAAGAGCATCTACTTTCGAGTGC  
CCAGCAGGGTTCCGATGGACTACACTTTGTCCGTACCCATCACGTAGCAGAGAAAACCAC  
CTTGTATGACATGGACATTGACATCACCCAGAAGTACGTGGCCGTGGCCTGCCAGGACCG  
CAATGTGAGAGTCTACAACACTGTGAACGGGAAGCAGAAGAAGTGTACAAGGGCTCCCA  
GGGTGACGAAGGGTCTTGTGAAGGTCCACGTGGACCCCTCAGGCACCTTCTGGCCAC  
CAGCTGCTCTGACAAAAGCATCTCAGTGATTGACTTTTACTCGGGCGAGTGCATTGCCAA  
GATGTTTGGCCATTGAGAAATTATTACCAGCATGAAGTTCACCTATGACTGTCATCACTT  
GATCACAGTATCTGGAGACAGCTGCGTGTTCATCTGGCACCTGGGCCCCGAGATCACCAA  
CTGCATGAAGCAGCACTTGTGAGAGATTGACCACCGGCAGCAGCAGCAGCACACAAAGGA  
CAAGAAGCGGAGCGGGCACCCAGGCAGGATACGTATGTGTCCACACCTAGTGAGATTG  
CTCCCTGAGCCCTGGAGAGCAAACAGAGGATGATCTGGAGGAAGAGTGTGAGCCAGAAGA  
GATGCTAAAGACACCATCAAAGACAGCTTGGATCCAGATCCTCGGTGCCTGCTAACCAA  
CGGCAAGCTGCCACTGTGGGCAAAGCGGCTGCTAGGGGACGATGATGTGGCAGATGGCTC  
GGCCTTCCACGCCAAGCGCAGCTACCAGCCCCACGGCCGCTGGGCAGAGCGGGCCGGCCA

AGAGCCCCTCAAGACCATCCTGGATGCCAGGACCTGGATTGCTACTTTACCCCCATGAA  
GCCCCGAGAGTCTGGAGAACTCCATTCTGGATTCACTGGAGCCACAGAGCCTGGCCAGCCT  
GCTGAGTGAGTCAGAGAGTCCCCAGGAAGCTGGCCGCGGGCACCCCTCCTTCTGCCCCA  
GCAGAAGGAATCATCTGAGGCCAGTGAGCTCATCCTTTACTCTCTGGAGGCAGAAGTGAC  
AGTCACAGGGACAGACAGCCAGTATTGCAGGAAGGAGGTGGAGGCCGGGCCTGGAGACCA  
GCAGGGCGACTCCTACCTCAGGGTGTCTCTGACAGCCCAAAGGACCAGAGCCCCGCCTGA  
GGACTCGGGGGAGTCAGAGGCCGACCTGGAGTGCAGCTTCTCAGCCATCCACTCCCCAGC  
TCCGCCTCCTGACCCTGCCCCCTCGGTTTGCCACGTGCTGCCCCATTTCCAGGATGCGC  
AGGTCCCACAGAAGATGAGCTGTCCCTGCCCCGAGGGACCCAGCGTCCCCAGCAGCTCCCT  
ACCCAGACTCCAGAGCAGGAGAAGTTCCTCCGCCACCCTTTGAGACACTGACTGAGTC  
CCCCCTGACAGAGCTCTTCCCCGAGCTCTGGGAGACACGGAGGCCTCTGAAGCTGAAGA  
CTACTTCTTCAACCCACGCCTGAGCATCTCCACGCAGTTCTCTCAAGCCTCCAGAAGGC  
ATCCAGGTTTACCACATACCTTCCCTCCCCGGGCAACCCAGTGCCCTTGTGAAGTCTCCAGA  
GGTCAAGCTCATGGACCGAGGCGGAAGCCAGCCCAGAGCAGGTAAGTGGCTACGCCTCCCA  
AGACAGGACCCACGTCTCGCTGCAGGGAAGGCTGAAGAGACCCTGGAGGCCTGGCGCCT  
ACCACCTCCCTGCCTTACGAGCCTGGTGTCTGTGTCCCTGCTTCCCTCCGTGCTGTCCAC  
AGACAGGAAGCTCCCAACGCCACATCTGCACCCACCCAGGCCTGGCTCAGGGTGTCCA  
TGCCCCCTCCACCTGTTTCTACATGGAGGCCACTGCCAGCTCCCGTGCCAGGATATCACG  
CAGCATCTCCCTCGGTGACAGTGAGGGCCCTATCGTGGCCACACTGGCCCAGCCCCCTCCG  
TAGGCCATCGTCCGTTGGGGAGCTGGCCTCCTTGGGCCAGGAGCTTCAGGCCATCACCAC  
TGCGACAACACCCAGTTTGGACAGTGAGGGCCAAGAGCCTGCCCTGCGTTCTGGGGCAA  
CCACGAGGCCCGGGCAACCTGAGACTGACCCTGTCAAGTGTCTGTGATGGGCTCCTGCT  
GCCCCCGTGGATGCCAGCCTGGCGTCACCGTCCCGGCAGTGAGCTTCCCAGCCCCCTAG  
CCCCGTGGAAGAGAGCGCCCTGAGGCTCCATGGCTCTGCCTTTCGCCCAAGTCTCCCAGC  
TCCTGAGTCCCCTGGCCTTCCCTGCCCACCCAGTAACCCCCAGCTTCCAGAGGCCGGGCC  
TGGCGTCCCTGGCGGCACTGCCTCCCTCCTGGAGCCCACCTCCGGTGCCTTGGTCTGTT  
CCAGGGCAGCCCTGCCCCGTGGAGTGAGCCCTGGGTGCCGTTGAAGCCCTGCCACCGTC  
TCCCCCTTGAGCTGAGCAGGTGGGGAACATCTTGACAGGCTGCAGACCACCTTCCAAGA  
AGCCCTCGACCTTTACCCTGTGTGGTCTCCAGTGGCCAGGTGGACACCGGGCAGCAGCA  
GGCAGGACTGAGCTGGTCTCCACCTTCTGTGGATCCACAGCCAGCTGGAGGCCGAATG  
CCTGGTGGGACTAGTGTGGCCCCAGCCAGGCTCTGCCAGCCAGGACCCCCGTCCCC  
ACCGACGCTGTACCCCCCTGGCCAGCCAGACCTGCAGGCCCTGCTGGAACACTACTCGGA  
GCTGCTGGTGCAGGCCGTGCGGAGGAAGGCACGGGGTCACTGAGGGCGCAGCCCCCTCCAC  
CGCAGCCCTGCTGCCTCTGAGGACTTAGGTATTTTAAGCGAATAAACTGACAGCTTGGAG  
GAATG

>Macaca mulatta\_WDR62 (JU472486.1)

GTTGATTCACTGGGTTGTGGCGGTGGCGGCGGCGGCTTAAGGGATGTAACGGTCCGCC  
GGCTCCGGCGTGACGATGGCGGCCGTAGGGTCCGGAGGCTGTGCGCGGAACGATGCAGGG  
GAGAAGCTGCCCTCTGTATGGCGGGAGTTCGGCGCGGAGGGGTGAGTCTCCCCGCCG  
CCCCCCCCACCGCTCTGCCTCCGGCGGCGGACGCGACTCTCGACGGCCTCCGAGGAGACG  
GTGCAGAACC GGGTGTCACTCGAGAAGGTGCTTGGCATCACAGCCCAGAATAGCAGTGGC  
CTAACCTGTGATCCTGGCACAGGCCATGTGGCCTACCTGGCAGGCTGTGTGGTGGTGATT  
TTGGACCCCAAGGAGAACAACAGCAGCACATCTTTAACTGCCAGGAAGTCTCTGAGT  
GCTCTGGCCTTCTCCCCTGATGGGAAGTACATAGTGACAGGGGAGAATGGGCATAGGCCT  
GCTGTGCGCATCTGGGATGTGGAGGAGAAGAATCAGGTGGCGGAGATGCTAGGCCACAAG  
TATGGTGTGGCCTGTGTGGCCTTCTCACCAATATGAAGCACATCGTGTCCATGGGCTAC  
CAACATGACATGGTGTCTCAACGTCTGGGACTGGAAGAAAGACATCGTAGTGGCCTCCAAC  
AAGGTATCTTGTAGAGTCATCGCCCTCTCCTTCTCAGAGGACAGCAGCTATTTTGTCACT  
GTTGGGAACCGACATGTGAGGTTCTGGTTCTTGGAAAGTCTCCACTGAGACAAAGGTGACG  
AGCACAGTGCCCCCTGTAGGGCGCTCAGGCATCCTGGGCGAGCTACACAACAATATTTTC  
TGTGGTGTGGCCTGCGGTGCGGGCCGGATGGCAGGCAGTACCTTCTGTGTGTCTACTCG  
GGCCTCCTCTGCCAGTTCAATGAGAAGAGGGTGTGGAGAAGTGGATCAACCTGAAGGTC  
TCCCTGTCTTCTGCCTCTGTGTGACCCAGGAGCTCATCTTCTGTGGCTGCACAGATGGG  
ATAGTCCGCATCTTCCAGGCCACAGCCTGCACTACCTCGCCAACCTGCCCAAGCCACAC  
TACCTTGGGGTAGATGTGGCACAGGGCCTGGAGCCCAGCTTCTCTTCCACAGGAAGGCA  
GAAGCAGTCTACCCAGATACAGTGGCACTGACCTTCCAGCCCATCCACCAGTGGCTGTCC



TGCGTGTATAAGGACCACAGCATCTACATCTGGGATGTCAAGGACATCAACAGAGTGGGC  
AAGGTGTGGTCAGAGCTCTTCCACAGCTCCTACGTTTGGAACGTGGAGGTGTATCCTGAG  
TTTGAAGACCAGAGAGCTTGTGGCCATCAGGATCCTTTCTGACTTGTTCTTCAGACAAC  
ACCATTTCGCTTCTGGAACCTGGACAGCAGCCCTGATTCTCACTGGCAGAAAAACATCTTC  
AGCAATACCCTGCTGAAGGTCGTGTATGTGGAGAATGACATCCAGCACCTGCAGGACATG  
TCACACTTCCCAGACCGGGGGAGTGAGAATGGGACGCCCATGGACGTGAAAGCCGGGGTG  
CGGGTCATGCAGGTCAGTCTGATGGCCAGCATTGGCTTCAGGCGACCGAAGTGGAAAT  
TTGAGGATCCACGAACCTGCACCTCATGGACGAGCTGGTCAAGGTGGAGGCCCATGATGCT  
GAGGTGCTGTGCCTGGAGTACTCCAAGCCAGAGACAGGGCTGACCTTGCTGGCCTCAGCC  
AGTCCGGGACCGGCTGATCCATGTGCTGAACGTGGAGAAGAACTACAACCTGGAGCAGACG  
CTGGATGACCACTCCTCCTCCATCACTGCCCATCAAGTTTCGCTGGCAACAGAGACATCCAG  
ATGATCAGCTGTGGGGCCGACAAGAGCATCTACTTTTCGAGTGGCCAGCAGGGTTTCAGAT  
GGACTACACTTTGTCCGTACCCACCACGTAGCAGAGAAAACCACCTTGATGACATGGAC  
ATTGACATCACCCAGAAGTACGTGGCCGTGGCCTGCCAGGACCGCAATGTGAGAGTCTAC  
AACACTGTGAACGGGAAGCAGAAGAAGTGCTACAAGGGCTCCCAGGGTGACGAAGGGTCC  
TTGCTGAAGGTCCATGTGGACCCCTCAGGCACATTCTGGCCACCAGCTGCTCTGACAAA  
AGCATCTCAGTGATTGACTTTTACTCGGGCGAGTGCATTGCCAAGATGTTTGGCCATTCA  
GAAATTATTACTAGCATGAAGTTTACCTATGACTGTCTACTTGTATCACAGTATCTGGA  
GACAGCTGTGTGTTTCTGTCACCTGGGCCCCGAGATCACCACCTGCATGAAGCAGCAC  
TTGCTGGAGATCGACCACCAGGAGCAGCAGCAGCACACAAGGACAGGAAGCAGAACAGC  
CACCCCAGGCAGGATACGTATGTGTCCACACCTAGTGAGATTTCGTTCCCTGAGCCCTGGA  
GAGCAGACAGAGGATGATCTGGAGGAAGAGTGTGAGCCAGAAGAGATGCTGAAGACACCA  
TCCAAAGACAGCTTGGATCCAGATCCTCGATGCCTGCTGACCAACGGCAAGCTGCCACTG  
TGGGCAAAGCGGCTGCTAGGGGACGATGATGTGGCAGATGGCTCGGCCTTCCATGCCAAG  
CGCAGCTACCAGCCCCACGGCCGTGGGCGAGCGGGCTGGCCAAGAGCCCCCTCAAGACC  
ATCCTGGATGCCCAGGACCTGGATTGCTACTTTACCCCCATGAAGCCCCGAGAGTCTGGAG  
AACTCCATTCTGGATTCACTGGAGCCACAAAGCCTGGCCAGCCTGCTGAGTGAGTCAGAG  
AGTCCCCAGGAAGCTGGCCCGGGCACCCCTCCTTCCCTCCCTCAACAGAGGGAATCATCT  
GAGGCCAGTGAGCTCATCCTCTACTCTCTGGAGGCAGAAGTGACAGTACAGGGACAGAC  
AGCCAGTATTGTGGGAAGGAGGCGGAGGCCAGGCCTGGAGACCAGCAGGGCGACTCCTAC  
CTCAGGGTGTCTCCAACAGCCCAAAGGACCAGAGCCCCCTGAGGACTCGGGGAATCA  
GAGGCCGACTTGGAGTGCAGCTTTCGCGGCCGTCCACTCCCCAGCTCCGCCTCCTGATCCC  
GCCCCCTCGGTTTGGCACGTTGCTACCCCCATTTTCCAGGATGCGCAGGTCCCACAGAAGAT  
GAGCTGTCCCTGCCCCGAGGGACCCAGCGTCCCCAGCAGCTCCCTACCCCAGACTCCGGAG  
CAGGAGAAGTTTCTCCGCCACCACTTTGAGACACTGACTGAGTCCCCCTGCAGAGAGCTC  
TTCCCCGCAGCTCTGGGAGACGTGGAGGCCTCTGAAGCTGAGGAGTACTTCTTCAACCCA  
CGCCTGAGCATCTCCACGCAGTTTCTCTCAAGCCTCCAGAAGGCATCCAGGTTTACCCAC  
ACCCTCCCTCCCCGGGCAACCCAGCACCTTGTGAAGTCTCCAGAGGTCAAGCCCATGGAC  
CAAGTTGGAAGCCAGCCCAGAGCAGATACTGGCTATGCCTCCCCAGACGGGACCCACGTC  
CTCGCTGCGGGGAAGGCTGAAGAGACGCTGGAGGCCTGGCGCCCACCACCCCCCTGCCTT  
ACAAGCCTGGCGTCTGTGTCCCTGCCTCCTCCGTGCTGCCCACGGACAGGAAGCTCCCA  
ACGCCCACATCTGTGTCCACCCCAGGCCTGGCTCAGGCTGTCCACACCCCCCTCCACCTGT  
TCCTACATGGAGGCCACTGCCAGCTCCCATGCCAGGATATCACGCAGCATCTCCGTCCGT  
GACAGCGAGGGCCCTATCGTGGCCACGCTGGCCCAGCCCCCTCCGTAGGCCATCGTCTGTT  
GGGGAACCTGGCCTCTCTGGGCCAGGAGCTTCAGGCCATCACCGCTGCAGCAACACCCAAT  
TTGGGCAGTGAGGGCCAAGAGCCTGCCCTGCATTCTGGGGCAACCACGAGGCCCGGGCC  
AACCTGAGACTGACCCCTGTCAAGTGTCTGTAACGGGCTCCTGCTGCCCCCGTGGATGCC  
CAGCCTGGCGTACCATCCCAGCAGTGAGCTTCCCAGCCCCCTAGCCCCGTGGATGAGAGC  
ACCCTGAGGCTCCATGGCTCTGCCTTTTCGCCCAGGTCTCCCAGCTCCTGAGTCCCCTGGC  
CTTCTGCCCCACCCTAGTAGCCCCCAGCTTCCAGAGGCCGGGCTGGCATCCCTGGCGGC  
ACTGCCTCCCTCCTGGAGCCCACTTCTGGTGCCTCGGTCTATTCCAGGGCAGCCCTGCC  
CGCTGGAGTGAGCCCTGGGTGCCGGCTGAAGCCCTGCCCCCATCCCCCTTGAGCTGAAC  
AGGGTGGGGAACATCTTGACAGGCTGCAGACCACCTTCCAAGAAGCCCTCGACCTTTAC  
CGTGTGTTGATCTCCAGTGGCCAAGTGGACACCAGGCAGCAGGCACGGACTGAGCTG  
GTCTCCACTTTCTGTGGATCCACAGTCACTGGAGGCCGAATGCTTGGTGGGGACCAGT  
GTGGCCCCAGCCCAGACCCTGCCAGCCCAGGACCCCCCTCCCCACCGACGCTGTGCCCT  
CTGGCCAGCCCAGACCTGCAGGCCCTGCTGGAACACTACTCGGAGCTGCTGGTGCAGGCT

GTGCGGAGGAAGGCACGGGGACACTGAGGGTGCAGCCCCTCCACCGCAGCCCTGCTGCTT  
CTAAGGACTTAGGTATTTTAAGCGAATAAACTGACAACCTGGAA

>Saimiri boliviensis boliviensis\_WDR62 (XM\_003937389.1)

CACCTAGTTCCTCTGGGTGGCGGCAAAAATCGAGGTGAGGCGGCTGTGGCCTTAGCCTTG  
TAAAAGTTAAAATCTGTATGTTCCAGCGAGTAATGAAAACGCAGTCTGGATGAAAGACCC  
CATGACGCTTGATCAGGCCCATCCTGTACACTAGCTGTGGCCCCGCCAGGCACTC  
GCTGCGCTTCTTCGTCCCCATTGGTCCTAGGAGCGCCGCCCGGCAGCCCTGAGATTGGCC  
AGACCGGGCCCGTCGTGTCCAATAGGCGGCGGCGCCGGCTTTCCCGCGGTTGTTTGCTGT  
TTCAGTGAGTCGTGGAGGCGGCGGCTTAGGGGATGTAACGGTCGCCCGGCTCCGGCGC  
GACGATGGCGGCGGTAGGGTCCGGAGGCTATGCGCGGAACGATGCGGGGAGAAGCTGAC  
CTCTGTATGGCGGGAGTTCCGGCGGAGGGGCCAGTCTCCCCGCCCGCCCCACC  
GCTCTGCTGCGGCGGCGACGCGATTCTCGACGCCCCGAGGAGACGGTGCAGAACCG  
GGTGTCACTCGAGAAGGTGCTTGGCATCACAGCCAGAACAGCAGTGGCCTAACCTGTGA  
CCCTGGCACAGGCCATGTGGCCTACCTGGCAGGCTGTGTGGTGGTGATTTTGGACCCCAA  
GGAGAACAAGCAGCAGCACATCTTTAACACCGCCAGGAAGTCTCTGAGTGCTCTGGCCTT  
CTCCCCGTGATGGGAAGTACATAGTGACAGGGGAGAATGGACACAGGCCTGCCGTGCGCAT  
CTGGGATGTGGAGGAGAAAAATCAGGTGGCGGAGATGCTAGGCCACAAGTATGGTGTGGC  
CTGTGTGGCCTTCTCGCCAATATGAAACACATCGTGTCCATGGGCTACCAACATGACAT  
GGTGCTCAACGTCTGGGACTGGAAGAAAGACATCGTGGTGGCCTCAACAAGGTATCTTG  
TAGAGTCATTGCTCTCTCCTTCTCAGAGGACAGCAGCTATTTTGTCACTGTTGGGAACCG  
GCATGTGAGGTTCTGGTTCTTGAAGTCTCCACTGAGACAAAGGTGACGGGCACAGTACC  
CCTTGTGGGCGCTCAGGCATACTGGGCGAGCTGCACAACAACATTTTCTGTGGTGTGGC  
CTGTGGTGGGGCCGGATGGCGGGCAGTACCTTCTGTGTGTCTACTCAGGCCTCCTTTG  
CCAGTTCAATGAGAAGAGGGTGTGGAGAAGTGGATCAACCTCAAGGTCTCCCTGTCTTC  
CTGCCTCTGTGTGACCCAGGAGCTCATCTTCTGTGGCTGCACAGATGGGATAGTCCGCAT  
CTTCCAGGCCACAGCCTGCACTACCTTGCCAACCTGCCAAGCCGCACTACCTTGGGGT  
AGATGTGGCACAGAAGGACTGGAGCCCAGCTTCTCTTCCACAGGAAGGCAGAAGCAGTCTA  
CCAGATACAGTGGCAGTACCTTCCAGCCCATCCACCCAGTGGCTGTCTGCGTGTATAA  
GGACCACAGATCTACATTTGGGACATCAAAGACATCAACAGAGTGGGCAAGGTGTGGTC  
AGAGCTCTTCCACAGCTCTTACGTCTGGAATGTGGAGGTGTATCCTGAGTTTGAAGACCA  
GAGAGCTTGTGGCCATCAGGATCTTTTTCTGACTTGCTCTTCCAGACAACACCATTTCGCTT  
CTGGAACCTGGACAGTAGCCCTGACTCTCACTGGCAGAAAAACATCTTCCAGCAATACCCT  
GCTGAAGGTTGTGTATGTGGAGAATGACATCCAGCACCTGCAGGACATGTCACACTTCCC  
AGACCGGGGAGCGAGAATGGGACACCCATGGACGTGAAAGCCGGGGTGCGGGTGATGCA  
GGTCAGTCTGACGGCCAACATTTGGCTTCCAGGCGACCGAAGTGGAAATCTGAGGATCCA  
CGAGCTGCACTTTCATGGACGAGCTGGTCAAGGTGGAGGCCCATGATGCTGAGGTGCTGTG  
CCTGGAGTACTCTAAGCCGGAGACAGGGATGACCTTGTGTCCTCAGCCAGTCCGGACCG  
GCTGATCCATGTGCTGAACGTGGAGAAGAATAACAACCTGGAACAGACGCTGGATGACCA  
CTCCTCCTCCATCACCGCCATCAAGTTTCGCTGGCAACAGAGACATCCAGATGATCAGCTG  
TGGGGCTGACAAGAGCATCTACTTTTCGACGTGCCAGCGGGGTTCCGGATGGACTACACTT  
TGTCCGTACCCACCACGTAGCAGAGAAAACCACCTTGTATGACATGGACATTGACATCAC  
CCAGAAGTATGTGGCCGTGGCCTGCCAGGACCGAAATGTGAGAGTCTACAACACCGTGAA  
CGGGAAGCAGAAGAAGTGTACAAGGGCTCCCAGGGTGACGAAGGGTCTTACTGAAGGT  
CCATGTGGATCCCTCAGGTACCTTCTGGCCACTAGCTGCTCTGACAAAAGCATCTCAGT  
GATTGACTTTTACTCAGGCGAGTGCATTGCCAAGATGTTTGGCCATTGAGAAATTATTAC  
CAGCATGAAGTTACCTATGACTGTCACTTGTATCACAGTATCCGGAGACAGCTGTGT  
GTTTCTGTCACCTGGGCCCAGAGATCACCACCTGCATGAAGCAACACTTGTGGAGAT  
CGACCGCCGGGAGCAGCAGCAGCACGAAGGACAGGAAGTGGAGTGGCCACCCAGGCA  
GGATACCTATGTGTCCACACCTAGCGAGATTTCGCTCCCTGAGCCCTGGAGAGCAGACAGA  
GGATGATCTGGAGGAAGAGTGTGAGCCAGAAGAGATGCTGAAGACACCATCCAAAGACAG  
CATGAATCCAGATCCTCGGTGCCTGCTAACCAATGGCAAGCTGCCACTGTGGGCAAAGCG  
GCTGCTAGGAGATGATGATGTGCCAGATGGCTCGGCCTTCCACGCCAAGCGCAGCTACCA  
GCCCCACGGCCGCTGGGCAGAGCGGGCCGGCCAGGAGCCCCTCAAGACCATTCTTGATGC  
CCAGGACCTGGATTGCTACTTTACCCCATGAAGCCGAGAATCTGGAGAACTCCGTTCT  
GGATTCACTGGAACCACAGAGCCTGGCTGGCCTGCTGAGTGAGTCAGAGAGTCCCCAGGA  
GGCTGGCCACGGGCACTCCTCCTTCTGCCCAACAGAGGGAATCATCGAATGAGGCCAG

TGAGCTCATCCTCTACTCCCTGGAGGCAGAAGTGACAGTCACAGGGACAGACAGCCAGTA  
CTGCGGGAAGGAGGCGGAGGTGCGGCCTGGAGACCAGCAGGGCGACTCCTACCTCAGGGT  
GTCCTCCATCAGCCCAAAGGATCAGAGCCCCTGAGGACTCAGGGGAGTCCGAGGCCGA  
CCTGGAATGCAGCTTCGAGGCCGTACACTCCCCAGTTCGCCACCTCACCCACCCCTCA  
GTTTGTACGTTGCTGCCCATTTCCAGGATGCACAGGTCCCACAGAAGATGAGCTGTC  
CCTGCCTGAGGGACCCAGCATCCCCAGCAGCTCCCTGCCCCAGACTCCCGAGCAGGAGAA  
GTTCTCCGTACCCTTTGAGACGCTGACTGAGTCCCCCTGCAGAGAGCTCTTCCCCAC  
AGCCCTGGGAGACACGGAGGCCTCTGAGACTGAGGACTACTACTTCAACCCGCGCCTGAG  
CATCTCCACGCAGTTTCTCTCCAGCCTCCAGAAGGCATCCAGGTTACCCACACCTTCCC  
TTCTCGGGCAACCAGCACCTTTGTGAAGTCTCCGGAGGTCAAGCCACAGACCCGAGGTG  
AAGCCAACCCAGAGCAGGTACTGGCTACACCTCCCAAGACGGGACCCACGTCTCACTGC  
AGGGAAGGCGCAGGAGACCTTGAGGCCCTGGCGCCACCACCCCTGCCTTACAGGCCT  
GGTGCCCTGTGTCCCTGCCTCCTCCGTGCTGCCACAGACGGGAAGCTCCCAACGCCAC  
ATCTGCACTCACCTAGGCCCGGCTCAGGGTGTCCACGCCCTCCACCTGCTCCTACAT  
GGAGGCCCTGCCAACTCCCGTGCCAGGATATCACGCAGCATCTCCCTCGGGGACAGCAA  
GGGCCCTATCGTGGCGGAGTTGGCCCGGCCCTCTGTAGGCCATCGTCCGTGGGGACCT  
GGCCTCCCTGGGCCAGGAGCTTCAGACCATCACACCACGGTGACACCCAATTTGGACAG  
TGAAGGCCAAGAGCCTGCCCTGCACTCCTGGGGCAACCACGAGGCCCGGGCAACCTGAG  
ACTGACCCTGTCAAGTGTCTGTGATGAGCTCCTGCTGCCACCGTGGATGCCAGCCTGG  
TGTACAGTCCCAGGAGCGAGTTTCTCAGCCCCTAACCCCATAGACGGGAGCGCCCTGAG  
GCTCCATGGCTCTGCCTTTCTCCCAAGTCTCCAGTCTCTGAGTCCCCTGGCATTCTGC  
CCACCCAGTAGCCCCAGCTTCCAGAGGCCGACCTGGCGTCCCTGGTGCCACTGCCTC  
CCTCCTGGAGCCACCTCTGGTGCCTTGGTCTGATTGAGGGCAGCCCTGCCTGTTGGAG  
TGAGCCCTGGGTGCCGGCTGAAGCCCTGTCCCCGTCCCCCTTGAGCTGAGCAGGGTGGG  
GAACATCTTGACAGGCTGCAGACAGCCTTCCAAGAAGCCCTCGACCTTTACCGTGTGTT  
GGTCTCCAGTGGCCAGGTGGACACCAGGCAGCAGGCACGGAATGAGCTGGTCTCCAC  
CTTCTGTGGATCCACAGCCAACCTCGAGGCCAAGTGCCTGGTGGGGACCAGTGTGGCCCC  
AGCCCAGGCCCTGCCAGCCAGGTCCCCCTCCCCACCAACACTGTACCCCTGGCCAG  
CCCAGTCTGCAGGCCCTGTGGAACACTACTCAGAGCTGTGGTGCAGGCTGTGCGGAG  
GAAGGCACGGGGCCTGAGGGTGCAGCCCCTCCACCGCAGCCCTGCTGCTTCTGAGGAC  
TTAGGTATTTTACGTGAATAAACTGACAGCTTGGAGGAATG

>Mus musculus\_WDR62 (ENSMUST\_108190)

CTTTCCCGCGCCATTGCTATTTCGAGTGGGTGCTGGCTACAGGCGGCTGTTAAGAAGCG  
TAACGGACACTGGTCTCCGACAGCATGATGGCTGCCTTAGCGGCCGAGGTTATACGCGG  
AGTGACACGATAGAAAAGCTGTCTCTGTTCATGGCGGGAGTTCGGCGCGGAGAAACCAG  
TCCTCCCCGCCTCCTGCCCCACCGCTCTGCCTCCGGCGGCGGACGCGACTCGCGGCGGCT  
CCCGAGGACACTGTGCAGAACCAGGTTGACACTTGAGAAGGTGCTTGGCATCACAGCCCAG  
AACAGCAGCGGGCTAACCTGTGACCCTGGCACAGGCCATGTGGCCTACTTAGCAGGGTGC  
GTGGTGGTGGTCTTGAACCCCAAGGAGAACAAGCAGCAGCATATATTTAACACAACCAGG  
AAGTCCCTGAGTGTCTGGCCTTCTCCCCAGATGGGAAGTACATAGTGACAGGAGAGAAT  
GGACACCGGCCAGCTGTGCGCATCTGGGATGTGGAGGAGAAGACTCAAGTGGCAGAGATG  
CTGGGCCACAAGTATGGTGTGGCCTGTGTGGCTTTCTCACCCAATATGAAGCACATCGTG  
TCCATGGGCTACCAACATGACATGGTCTCAATGTTTGGGATTGGAAGAAAGACATTGTG  
GTGGCTTCCAACAAGGTGTATGTAGAGTATCGCTCTCTCCTTCTCTGAGGACAGCAGC  
TATTTTGTACCGTTGGGAATCGGCATGTGAGGTTTTGGTTCTTAGAAGCCTCTACTGAG  
GCCAAGGTAACCAGCACAGTGGCCCTGGTAGGACGCTCAGGCATCCTGGGTGAGCTGCAC  
AACAATATCTTTTGTGGCGTGGCCTGCGGCCGGGCGGATGGCAGGCAATACCTTCTGT  
GTGTCCTACTCTGGCCTCCTCTGCCAGTTCAATGAGAAAAGGGTGTGGACAAGTGGATC  
AACCTGAAGGTCTCCTTGTCTTCTGCCTGTGTGTGAGTGACGAGTTGATCTTCTGTGGA  
TGCACAGACGGGATAGTCCGCATCTTCCAGGCCACAGCCTACTCTACCTACCAACCTG  
CCCAAACCACACTACCTGGGAGTGGACGTGGCCACGGACTGGACTCCAGCTTCTCTTC  
CACAGAAAAGCAGAAGCAGTCTACCCAGATACAGTGGCCCTGACCTTTGACCCCGTCCAC  
CAGTGGCTGTCTGTGTTTACAAAGACCACAGCATCTACATCTGGGATGTCAAGGACATT  
GATGAAGTCAGCAAGATATGGTCAGAGCTCTTCCACAGCTCCTTTGTCTGGAATGTAGAG  
GTGTACCCTGAATTTGAAGACCAGAGAGCTTGCCTGCCGTCCGGGACTTTTCTGACTTGT  
TCCTCAGACAATACCATCCGCTTCTGGAATTTGGATAGCGCCTCTGACACTCGATGGCAA

AAGAACATCTTCAGCGATTCTCTGCTGAAGGTGGTCTATGTAGAGAATGACATCCAGCAC  
CTGCAGGACCTGTCTCACTTCCCAGACCGGGGCAGTGAGAACGGCACTCCCATGGATATG  
AAAGCTGGGGTTCGAGTCATGCAGGTGAGTCTGACGGCCAGCACTTGGCTTCAGGCGAC  
CGCAGTGGAAATCTGAGGATCCACGAGCTGCACCTTCATGGATGAGCTGATCAAGGTGGAG  
GCCCACGATGCTGAGGTGCTGTGCCTGGAGTACTCCAAGCCTGAGACAGGAGTGACTTTG  
CTGGCTTCAGCCAGTCGGGACAGACTCATCCATGTGTTAAACGTGGAGAAGAACTACAAC  
CTGGAGCAGACCCTGGACGACCACTCCTCCTCCATCACAGCCATTAAGTTTGCTGGCACC  
AGAGATGTCCAGATGATCAGTTGTGGAGCTGACAAGAGCATCTACTTTCGCAGTGCCCAG  
CAGGCCTCGGATGGACTGCACCTTGTCCGTACCCACCACGTAGCAGAGAAGACCACCTTG  
TATGACATGGATATCGACATCACACAGAAGTATGTGGCAGTGGCCTGCCAGGACCGCAAC  
GTAAGGGTCTACAACACCGTGAAGTGGGAAACAGAAGAAGTGTACAAGGGTTCCCAGGGC  
GACGAAGGGTCCCTGCTGAAGGTCCACGTGGACCCCTCAGGCACCTTCTGGCCACAAGC  
TGCTCTGACAAAAGCATCTCCTTGATTGACTTTTTACTCGGGCGAGTGTGTTGCCAAGATG  
TTTGGCCATTTCGAAATTGTCACTGGCATGAAGTTCACCTACGACTGCCGCCACTTGATC  
ACAGTATCTGGAGACAGCTGTGTGTTTACTCTGGCACCTGGGCCCGGAGATCACACCCTGC  
ATGAAGCAGCACTTGTGAGATCAACCACCAGGAGCAGCAGCAGCAGCCCAAGGACCAG  
AAGTGGAGTGGCCCTCCCAGCCAGGAGACATATGCATCCACACCAAGTGAATTCGTTCC  
CTGAGCCCTGGAGAGCAGACAGAGGATGAGATGGAGGAGGAATGTGAGCCAGAAGAGTTG  
CTGAAAACACCATCCAAAGACAGCTTGGACCCAGATCCTCGATGCCTGCTGACAAATGGC  
AAGCTGCCACTCTGGGCAAAGCGGCTGCTAGGGGATGATGATGTGGCAGACAGCTCAGCT  
TTCCACGCCAAGCGCAGCTACCAGCCACATGGCCGTTGGGCAGAGCGGGCTGAGCAGGAA  
CCCCTCAAGACCATCCTGGATGCCTGGAGCCTGGATTCTACTTTACACCCATGAAGCCT  
GAAAATCTCCAAGACTCTGTTCTGGACTCAGTAGAGCCACAGAACCTGGCAGGCCTGCTA  
AGTGAGTGTTCACTCGGTAATGGACACACGTCTCCGGGAGAAGGCTTGGTGAGCTACCTA  
CTTACCCAGAGTTAGGGAGTCCCAAAGAGGACAACCGAGGCCACCCCTCCTACCTGCCT  
CTACAGAGGGAAGCCACCGAGGCAAGCGAACTCATCCTCTGCTCCCCAGAGGCGGAAGTG  
TCACTTACAGGGATGCACAGGGAGTATTATGAGGAGGAGACAGAGGCAGGACCTGAAGAC  
CAGCAAGGCGACACCTATCTCAGGGTCTCTTCCGTGAGTTCAAAGGATCAGAGCCCCCT  
GAGGACTCAGGGGAGTCAGAGGCTGAACCTGGAGTGCAGCTTTGCCGCCGCCACAGCTCA  
GCTCCTCAAACCGACCCCTGGCCCTCACCTCACCATGACAGCAGGTAAGCCAGAGTACCCA  
AGTACAGAAGAGCTTTCCAGCCTGAGCTGCCAGGCTTGGGCAATGGCTCCTTACCCAG  
ACACCTGAGCAGGAGAAGTTCCTCCGCCACCATTTTTGAGACACTTACTGATGCCCTACT  
GAAGAGCTCTTTTATGGATCCCTGGGAGACATAAAGATCTCAGAGACTGAGGACTATTTT  
TTCAATCCCCGGCTGAGCATATCCACCCAGTTCTCTCCCGCCTCCAGAAGACCTCCAGG  
TGCCCTCCCCGACTGCCCTGCACCTTATGAAGTCTCCAGAGGCTCAGCCTGTGGGCCAA  
GGGGCAACCAGCCCAAAGCAGGGCCCTGAGAGCAGGTAAGGCTACATGTCTCAGAT  
GGGACCAACGTCTCTCTGGGCAGAAGGCTGAAGAACTCAAGAGGCCTTGAGTCTACTG  
GACAGGAAGCCTCCAACACCCACATCTGTACTGACCACAGGCCGGGAGCAAAGTATCTCC  
GCCCCATCTTCGTGTTCTTACCTGGAGTCCACAACGAGCTCACATGCCAAGACGACACGC  
AGCATCTCTTGGGGACAGTGAGGGCCCTGTGACAGCTGAGCTACCCAGTCACTTAC  
AAGCCCTTATCCCCTGGCCAGGAACCTCCAAGCCATCCCCACTACAGTGGCACTGACCTCC  
AGCATCAAAGACCACGAGCCTGCACCGCTTTTCTGGGGCAACCATGAGGCCCGAGCCAGC  
CTGAAACTGACCTTATCCAGTGTCTGTGAGCAGCTGCTCTCTCCACCTCCACAGGAGCCA  
CCCATCACCCATGTGTGGTCTCAGGAACCTGTGGATGTCCCACCTAGTATGGCAGTCACA  
GTAGCCAGCTTCTGTGCACCCAGCCCTGTAGACATGAGCACCCCTGGGACTCCACAGTTCT  
ATGTTTCTCCCAAAGACCTCAGCCTCTGGGCCCCTAACCCCTCCTGCCACCTCCAACTT  
CTAGAGACCAGGCTTAGGGTGCCTGGCAGCACTGCTGCTCTCCTGGAGCCCACCCCGAT  
GCATCAGGTGTGATCGCAGACAGCCCTGGACACTGGGACACAGAAGTCCCTACCCAGAA  
CTCCTAGGCAGTGTGGAATCAGTCTTGCACAGGCTGCAGACTGCCTTCCAAGAAGCTCTT  
GACCTTTACCGCATGCTGGTCTCCAGCAGCCAGCTGGGTCTGAGCAGCAGCAGGCACAG  
ACCGAGCTGGCCTCCACCTTCCACTGGATCCTCAACCAGCTAGAAGCCAGCAACTGTATG  
GCTGCAGCTAACTTGGCCCCACCCAGACACTGCCTAGCCAGACCCTCTGTCCCTACCT  
ACACTTTGTCCCCTGGCCAGCCCAAACCTGCAGGCCCTGCTGGAACACTACTCAGAGTTG  
CTGGTGCAAGCAGTGAGGAGGAAGGCAAGGGGTGACTGAGAACCTGAAGCCCCTCTACCA  
AAGCCCCGCTGCCCTGGAGAAATAGATTTGTAACCAATAAACTGACAGTTGTTTCTGG  
AA

>Rattus norvegicus\_WDR62 (ENSRNOT\_65011)  
ATGATGGCTGCCTTAGCGGCCGGAGGTTACGCGCGGAGTGACACGATAGAAAAGCTGTCC  
TCTGTTCATGGCGGGAGTTCGGCGCGGAGAAACCAGTCCTCCCCGCCTCCTGCCCCACCG  
CTCTGCCTCCGGCGGGACGCGACTCGCGCGGCTCCCGAGGACACTGTGCAGAACCGG  
GTGACACTTGAGAAGGTGCTTGGCATCACAGCCCAGAACAGCAGCGGGCTCACCTGTGAC  
CCTGGCACAGGCCATGTGGCCTACTTAGCAGGCTGTGTGGTGGTGGTCTTGAACCCCAAG  
GAGAACAAGCAGCAACATATATTTAACACTACCAGGAAGTCCCTGAGTGCTCTGGCCTTC  
TCCCCAGATGGGAAGTACATAGTGACAGGAGAGAATGGGCACCGGCCAGCTGTGCGCATC  
TGGGATGTGGAAGAGAAGACTCAGGTGGCAGAGATGCTGGGCCATAAGTATGGTGTGGCC  
TGTGTGGCCTTCTCACCCAATATGAAGCACATCGTGTCCATGGGCTACCAACATGACATG  
GTCTCAATGTTTTGGGACTGGAAGAAAGACATTGTGGTGGCTTCCAACAAGGTGTCTGTGT  
CGAGTCACTCGCCCTCTCCTTCTCTGAGGACAGCAGCTATTTTGTCACTGTTGGCAATCGG  
CATGTTAGGTTTTGGTTCTTAGAAGCCTCTACAGAGGCCAAGGTAACCAGCACAAATGCC  
CTGGTAGGGCGCTCAGGCATCCTGGGTGAGCTGCACAACAATATCTTTTTGTGGCGTGGCC  
TGCGGCCGGGGCCGGATGGCAGGCAATACCTTCTGTGTGTCTACTCTGGCCTCCTCTGC  
CAGTTCAATGAGAAGAGGGTACTGGACAAGTGGATCAACCTAAAGGTCTCCTTGTCTTCC  
TGCCTCTGTGTGAGTGACGAGTTGATCTTCTGTGGATGCACAGACGGGATAGTCCGCATC  
TTCCAGGCCACAGCCTGCTCTACCTCACGAACCTGCCCAAACCGCACTACCTGGGAATA  
GACGTGGCCCAGGGTCTGGACTCCAGCTTCTTTTTCCACAGAAAAGCAGAAGCAGTCTAC  
CCAGATACAGTGGCCCTGACCTTTGACCCCATCCACCAGTGGCTGTCTGTGTTTATAAA  
GACCACAGCGTCTACATCTGGGATGTCAAGGACATTAATGAAGTCAAGCAAGATATGGTCA  
GAACTCTTCCACAGCTCCTTCGTCTGGAATGTAGAGGTGTACCCCGAATTGGAAGACCAG  
AGAGCTTGCCCTGCCATCCGGGACTTTTTCTGACTTGTTCCTCAGACAACACCATCCGCTTC  
TGGAATATGGATAGCGGCTCTGACACTCAATGGCGGAAAAACATCTTCAGCGATTCCCTG  
CTGAAGGTGGTCTATGTGGAGAACGACATCCAGCACCTGCAGGACATGTCTCACTTCCCA  
GACCGGGGTAGTGAGAACGGGACGCCCATGGATATGAAAGCTGGGGTTCGAGTCATGCAG  
GTCAGTCCCTGATGGCCAGCACTTGGCCTCAGGCGACCGCAGTGGAAATCTGAGGATCCAC  
GAGCTGCACTTCAAGCTGAGACAGGAGTACTTTGCTGGCTTCAGCCAGTCCGGACCGG  
CTCATCCATGTGTTAAATGTAGAGAAGAATTACAACCTGGAGCAGACACTGGATGACCAC  
TCCTCCTCCATCACTGCCATTAAGTTTGGCTGGCACCAGAGATGTCCAGATGATCAGCTGC  
GGAGCCGACAAGAGCATCTACTTTTCGAGCGCCCAGCAGACCTCGGATGGGCTGCACTTT  
GTCCGTACCCACCACGTAGCAGAGAAGACCACCTTGTATGACATGGATATTGACATCACA  
CAAAAGTATGTGGCTGTGGCCTGCCAGGACCGCAATGTAAGGGTCTACAACACAGTGAGC  
GGGAAACAGAAGAAGTGTACAAGGGCTCTCAGGGTGCAGGAGGGTCCCTGCTGAAGGTC  
CATGTGGACCCCTCAGGCACCTTCTGGCCACAAGCTGCTCTGACAAAAGCATCTCCGTA  
ATTGACTTTTACTCAGGCGAGTGTGTTGCCAAGATGTTTGGCCATTGAGAAATTGCTACT  
GGCATGAAGTTCACCTATGACTGCCGCCACTTGATCACAGTATCCGGAGACAGCTGTGTG  
TTCATCTGGCACCTGGGCCCCGAGATCACACCTGCATGAAGCAGCACTTGATGGAGATC  
AACCACCAGGAGCAGCAGCATCTGCCAAGGACCAGAAGTGGAGTGGCCCTCCAGCCAG  
GAGACCTCTGCATCCACCCCAAGTGAGATCCGTTCCCTGAGCCCTGGGGAGCAGACAGAG  
GATGAGATGGAGGAGGAGTGTGAACCAGAAGAGACGCTGAAAACACCGTCCAAAGAGAGC  
TTGGACCCAGATCCTCGGTGCCTGCTGACCAATGGCAAGCTGCCACTGTGGGCAAAGCGG  
CTGCTAGGGGATGATGATGTGACAGACAGCTCAGCCTTCCACGCCAAGCGCAGCTACCAG  
CCACATGGCCGTTGGGCAGAGCGGGCTGAGCAGGAACCCCTCAAGACCATCCTGGATGCC  
TGGGCCCTGGATTCTACTTTACACCCATGAAGCCTGGAATCTTGAAGACTCTGTTCTG  
GACTCAGTAGAGCCACAAAACCTGGCAGGCCTGCTAAGTGAAGTCTCACCAGAGAATGGA  
CACACGGCCCCGGGAGAAGGCCTGGTGAAGTACCTTTTGTCACTCAGAGTCAAGGAGCCCC  
AAAGAAGACAGCCGAGGACACCCCTCCTACCTGCCTCTACAGAGGGAAGGCACTGAGACA  
AGAGAACTCATCCTCTGCTCCCCAGAGGTGGAAGTGACAGTTACAGGGATGCACAGGGAG  
TATTATGAGGAGGCAGAGGCAGGACCTGAGGACCAGCAAGGCGATTCTATCTCAGGGTC  
TCCTCCGTGAGTTCAAAGGATCAGAGCCCTCCTGAGGACTCAGGGGAATCAGAGGCTGAA  
CTGGAGTGCAGCTTTGCTGCCGCCCATGTCTCAGCTCCTCGAACGGACCCTGGCCCTCAC  
CTCACCATGACAGGTAAGCCAGAGCACTCAAGTACAGACGAGCTTGCCAGCCTGGGGTG  
CCGGGCTTGGGCAATGGCTCCTTACCCAGACGCCTGAGCAGGAGAAGTTCCTCCGCCAC  
CATTTTGAAGACTCTTACTGATGCCCTGCTGAAGAGCTCTTTCTGGATCACTGGGAGAC  
ATAAAGATCTCAGAGACTGATGACTATTTCTTCAATCCCCGGCTGAGCATCTCCACACAG

TTCTCTCCCGCCTCCAGAAGACCTCCAGGTTCCCTCCCCGGCTGCCCCTGCACCTTATG  
AAGTCTCCAGAGGTTTCAGCCTGTGGGCCAAGGGGGCAACCAGCCCAAAGCAGGGCCCCTG  
AGAGCAGGTAAGTGGCTACATGTCTCAGATGGGACCAATGTCTCTCTGGGCAGATGGCT  
GAAGAGACTCCAGAGGCCTCGTGTCTACCAACCCCTCCCATCACAGGCCTGGCATCCTGT  
GTCCCTCCTTCTCAGTGATACCCACAGACAGGAAGCCTCCAACACCCACGTCTGGACTG  
ACCACAGGCCGGGAGCAGAGTATTCCTCGCCCATCTCCGTGTTCTTACCTGGAGTCCACA  
ACAAGCTCACATGCCAAGATGACTCGCAGCACCTCTCTCGGGGACAGTGAGGGCCCTGTG  
ACAGGCGAGCTACCCAGGCCACTCCACAAGCCCGTATCCCCGGCCAGGAACCCAGGCT  
GTTCCCACTACAGTAGCACTCACTTCTAGTGTCAAAGGCCATGAGCCTGCACTGCCTGCT  
TGGGGCAACCATGAGGCCCGAGCCAGCCTGAGACTGACCTTATCCAGTGTCTGTGAGCAG  
CTCCTCTCTCCACCGCAACTGGAGCCACCCACACACCTGTGTGGTCTCAGGAAGCTGTG  
GATGTCCCACCTAGTATGGCAGTACAGTAGCCAGCTTCTCAGCACCCAGCCCTGAAGAC  
ATGAGCACCCCTGGGACTCCACAGTTCTGTGTTTCTTCCAAAGACCTCAGCCTCTGGGCC  
CTCACCCCTCCTGCCCACCCCAACAGCCTCCAACCTTCTAGAGACCAGGTCTAGGATGCCT  
GGCAGCACCCCTGCTCTCCTGGAGCCACTCCTGATGCATCGAGTGGGAGCCAGACAGC  
CCTGGACACTGTGGGGAGCCTGGGCGCCGAGCTGAAGTCCCACCCCGAGGCCCTTGAG  
CTAGACAGTGTGGAATCAGTCTTGTACAGGCTGCAGACTGCCTTCCAAGAAGCCCTTGAC  
CTTTACCGAATGTTGGCCTCCAGCAACCAGCTGGGTGCGGAGCAGCAGGCACAGACT  
GAGCTGGCCTCCGCCTTCCACTGGATCCACCACCAGCTGGAAGCCAGCAACTGTGTGGGT  
GCAGCTAGCGTGGCCCCACCCCTCACACTGCCTAGCCCAGGCCCTCCCTCCCCACCTACA  
CTTTGTCCCCTGGCCAGCCCAAACCTGCAGGCCCTGCTGGAACACTACTCGGAGCTGCTA  
GTGCAGGCAGTGAGGAGGAAGGTGAGGGGCGACTGAGAGGCTGCAGCCCCTCTACCAAAG  
CCCTGCTGCCCCCGGAGAAATAGATTTGTAAGCAAATAAAGTACAGTTGTTTCTGGAA

>Ovis aries\_WDR62 (ENSOART\_5723)

ATGGCGGCCTTGGGGTCCGGAGGCTACGCGCGGAATGATACAGTTGAGAAGCTGCCATCA  
GTCATGGCGGGAGTTCCGGCGCGGAGGGCCAGTCTTCTCCGCCCCGGCTCCACCGCTC  
TGCCTCCGGCGGGGACGCGACTCCCGGGCGGCTCCCGAGGACACGGTGCAGAATCGGGTA  
TCACTGGAGAAGGTGCTCGGCATCACGGCCAGAACAGCAGTGGCCTAACCTGTGACCCC  
AGCACAGGCCACGTGGCCTACCTGGCAGGCTGTGTGGTGGTGATTTTGAACCCCAAGGAG  
AACAAGCAGCAGCACATTCTTAACACTGCCAGGAAGTCTCTGAGCGCTCTGGCCTTCTCC  
CCTGATGGAAAGTACATAGTGACGGGGGAGAATGGGCACAGGCCTGCTGTACGTATCTGG  
GACGTGGAAGAGAAGAGTCAAGTGGCGGAAATGCTGGGCCACAAGTATGGCGTGGCCTGC  
GTGGCCTTCTCCCCAACATGAAGCACATTGTGTCCATGGGCTACCAGCACGACATGGTG  
CTCAACGTCTGGGACTGGAAGAAAGACATCCTGGTGGCCTCCAACAAGGTATCGTGCCGG  
GTCATTGCCCTCTCCTTCTCAGAGGACAGCAGCTATTTTGTCACTGTTGGGAACCGGCAC  
GTGAGGTTCTGGTTCTTGAAGTGTCCACCGAAGCAAAGGTGACGGGCACGGTGGCCCTG  
GTGGGGCGCTCAGGCATCCTGGGTGAGCTGCATGACAACGTCTTCTGTGGTGTGGCTTGT  
GGCCGGGGCCAGATGGCAGGCAGTACCTTCTGTGTGTCTACTCGGGCCTCCTCTGTCAG  
TTCAACGAGAAGAGGGTGTGGAGAAGTGGATCAACCTGAAGGTCTCCCTGTCTTCTGTC  
CTCTGTGTGTCAGCCAGGAGCTCATCTTCTGTGGCTGCACTGATGGGATAGTCCGCATCTT  
CAAGCCACAGCCTACAGTACCTCACCAACCTGCCAAGCCGCACTACCTGGGGGTGGAT  
GTGGCCCAGGGCCTGGAGCCAGTGAAGTGTGGTGTATCTGCCTGCTTTGTTGTCACTCT  
GTGGGGGTGCTGGGTGCCTGGACTACCTCCTGGGTAAGCGTTTGGAGAGGGTGCCCAGAT  
GCCACAAAAGAAGGAGAAGATGGACGACAAGACATCAACCAAGTAGGCAAGGTGTGGTCC  
GAGCTCTTCCACAGCTCCTACGTCTGGAACGTGGAGGTGTATCCTGAGTTTGAAGATCAG  
AGAGCTTGTCTACCATCAGGATCTTTTCTGACTTGTTCCTCAGACAATAACCATCCGCTTC  
TGGAACATGGACAGCAACCCTGACTCTCACTGGCAGAAGAACATCTTTCAGTAATAACCCTG  
CTGAAGGTTGTGTATGTGGAGAACGACATCCAGCACCTGCAGGACATGTCACACTTCCCA  
GACCGGGGGAGCGAGAATGCGATGCCCATGGACGTGAAAGCTGGTGTTCGAGTCATGCAG  
GTCAGTCTGATGGCCAACACTTGGCTTCAGGCGACCGAAGTGGAAATCTGAGGATCCAC  
GAGCTGCACTTTCATGGATGAGCTGGTCAAGGTGGAGGCCACGATGCTGAGGTGCTATGC  
CTGGAGTACTCTAAGCCGGAGACAGGGCTGACTTTGCTGGCCTCGGCCAGTGGGACCGA  
CTGATCCACGTGCTGAACGTGGAGAAGAACTACAACCTGGAGCAGACCTTGGATGACCAC  
TCCTCATCCATCACGGCCATCAAGTTCGCTGGCAACAGAGACATCCAGATGATCAGCTGT  
GGCGCCGACAAGAGCATCTACTTCCCGAGTGGCCAGCGGGCCTCGGATGGACTGCACTTT

GTCCGTACCCACCATGTAGCTGAGAAGACTACCTTGTATGACATGGACATCGACATTACC  
CAGAAGTATGTGGCCGTGGCCTGCCAGGACCGCAATGTGAGAGTCTACAACACCGTGAAC  
GGGAAGCAGAAGAAGTGTACAAGGGCTCCCAGGGTGACGAGGGGTCCCTGCTGAAGGTC  
CACGTGGACCCCTCCGGCACCTTCTGGCCACGAGCTGCTCTGACAAAAGCATCTCAGTG  
ATTGACTTCTACTCAGGCGAGTGTGTTGCCAAGATGTTTGGCCATTTCAGAAATTGTCACC  
GGCATGAAGTTCACCTATGATTGCCGTCACTTGATCACCGTGTCCGGAGACAGCTGTGTC  
TTCATCTGGCACCTGGGCCCTGAGATCACCAACTGCATGAAGCAGCACTTGCTGGAGATC  
GACCACCGGGAGCAGCAGCAGCAGAACACGAAGGACGGCGCATGGAGCGGCCACCCAG  
CAGGAGATATATGCGTCCGTGCCTAGTGAGATTTGCTCCCTGAGCCCTGGAGAGCAGACG  
GAGGATGAGCTGGAGGAAGAATGTGAATCTGAAGAGTTGCTGAAGACCCCATCCAAGGAG  
AGCTTTGGATCCAGATCCTCAGTGCCTGCTGACCAACGGCAAGCTGCCGCTCTGGGCGAAG  
CGGCTGCTAGGAGATGATGACGCAGCAGCAGCACAGCCTTCCATGCCAAGCGCAGCTAC  
CAGCCGCATGGCCGCTGGGCAGAGCGGGCTGACCAGGAGCCTCTTAAGACCATCCTCGAT  
GCCAGGGACCTGGACTGCTACTTACCCCCATGAAGCCCGAGAGCCTGGAGGATTCCGTC  
CTGGATGCGATGGAGTCACAGAGACTGGCAGGCCTGCTGAGCGAGTCCGAGAGTCCCCAG  
GAGGATGGCTGCGGGCACCCCTTCCCTTGTACCCCCACAGCGAGAGTCTTCTGAGGCCAGC  
GAGCTCATCACCTGCCCCCGGAGACAGAGGTGACAGTCACAGGGAGGGACAGTGAGTAC  
TGTGCGGAGGAGGTAGTGGAGGCGTGCAGGAGACCAGCAAGGGAACCCCTTCCCTCCAGTC  
CCCTCAATCGGCTCGAAGGACCGGAATCCCCCTGAGGACTCGGGGGAGTCAGAGGCTGAC  
TTGGAGTGCAGCTTACCACCATCCATTCTCTCTCCACAGCCAGACCCAGAACCTCAG  
TTTGACACAATGCCCCCATAACCAGGATGCCAGGGACTGCAGGAGAATTGCCAGGCC  
GAGGTGCCAGGCATATCCAACAGCTCCCTGCCCCAGACCCCTGAGCAAGAGAAGTTCCCTC  
CGCCACCCTTCCGAGACGCTTACTGATGCCACCCTGAGGAGCTCTTCCCTCGGATCCCTG  
AGAGACCTGAAAGCCTCTGAGACCGAGGATGACTTCTTCAACCCCGACTGAGCATCTCA  
GCCCAGTTCCCTCTCCCGCCTTCAGAAGACATCCAGGTTTCCCCACACCTTCCCTTCCCGA  
CTTCCCCGGCACCTCGTGAAGTCTCAGAGGTGACTCACGGACCTCCAGGGCGAGCCC  
CCAAGAGTGGGTGCTGGCTCCACCTCCCCAGTCAGGACCAGCGTTGTTCCCTGGAGGAAAG  
GCTGAGGAGACGCTGGAGGTGTGGACCCCACTGTGTGAGTGTCCCCCTGCTATGGCGCCC  
TGATCCCCCTCCTTCTGCGCTGCCACAGACAAGAAGCCACCAGCACCCACAGCCCTA  
CCCCGCTGCAGGCCTGGCTCAGGGTGTCCACACCCCAACCACCCGCTCCACATGGAGGCC  
ACTGCCAGTTCCCATGCCAAGATGTCCCGCAGCATTTCACTGGAGGAGCTGGCCTCCCTG  
AGCCAGGAGTGCCAGGCTGTACCACCACAGTGACACACAGTTCTGACAGTGAGGGCCGA  
GAACCTGCCCTGCCCTCCCGGGCAACCATGAGGCCCGCGCCAGCCTGAAACTCAGCCTG  
TCGAGCATCTGTGACAGGCTCTTGCTGCCCCCAACCCAACTGGAGCCTCCTACCACGTGT  
GTCTGGTCCCAGGAGCCTGTGGACACCGAGCGCAATGTCACTGTTACGACAGATGGTTTC  
CCAGCCCACAGCCCTGCAGATGGGATCACCTCGAGGCTGCACAAGTCCGCCTTTCTCCCA  
AGGTTCCCTGGCCCCTGTGCGCCTCGATAACCCTGTCTCCCTGACAGTCCCCCGCTCCCA  
GAGGCCAGGCCTAGGGTCTTGGCAGCATCACCTCTCTCCGGGAGCCCAGCCCTGAAGTA  
CCCAGTCCAGTCCAGGACTGCCCTGGACACTGGGAGGACCCAGAGCGCCAACCAGCTTC  
CTGCCTCCAGACCCCTGGAGCTGAGCAATGTGGGGACTGTGCTGCACAGACTGCAGGCT  
GCCTTCCAGGAAGCCCTGGACCTTTACCACCTGATGGTCTCCAGTGATGAGGTGAACGCC  
GAACAGCGGCAGGCACAACTGAGCTGGCCTCCACTTCTCTGGATCCACAGCCAGTTA  
GAGGCTAGCGACTGGCTGGTGGGGACGGATGTGGCCACAGCCAGGCCCGCCAGCCCA  
GGTGCTCCCTCCCGCCTACCCTGTGCCCCCTGGCCAGCCCGATTTGCGTGCCCTGCTG  
GAACACTACTCAGAGCTGCTGGTGCAGGCCGTGAGGAGGAAGGCGCGTGGGGACTGA

>Loxodonta africana\_WDR62 (ENSLAFT\_13721)

ATGGCGGCCTTGGGCCCCGAGGCTACGCGCGGAACGACGCGGTGAGAAACTGTGCTCT  
GTCACCGCGGGGGTCCGGCGAGGAGAGGCCAGCCCTCCCGCCCCCGCCCCACCGCTCT  
GCCTCCGGCGGGACACGACTCACGGCGGCGCCGAGGACACGGTGCAGAGCCGGGTGT  
CGCTGGAGAAGGTGCTCGGCATCACAGCCCAGAACAGCAGCGGCCTAACCTGCGACCCCA  
GCACAGGCCATGTGGCCTACCTGGCAGGCTGTGTGGTGGTGATTTTGGACCCCAAGGAGA  
ACAAGCAGCAGCACATCTTCAATACTGCCAGGAAGTCCCTGAGTGCTCTGGCCTTCTCAC  
CTGACGGGAAGTACATAGTGACAGGAGAGAATGGACACAGGCCCGCTGTGCGCATCTGGG  
ATGTGGATGAGAAGAGCCAGGTGGCGGAGATGCTGGGCCACAAGTACGGCGTGGCCTGCG  
TGGCCTTCTCACCCAACATGAAGCACATCGTGTCCATGGGCTACCAGCATGACATGGTGC

TC AATGTCTGGGACTGGAAGAAAGACATCGTGGTGGCCTCCAACAAGGTGTCATGCAGGG  
TCATCGCCCTCTCCTTCTCAGAAGACAGCAGCTACTTTGTCACTGTTGGGAACCGGCACG  
TGAGGTTCTGGTTTTTGG AAGTCTCCACTGAAGCAAAGGTGACAGGGACGGTGCCCTGG  
TAGGGCGCTCGGGCATCCTCGGTGAGCTGCACAACAACGTCTTCTGTGGTGTGGCCTGCG  
GCCGGGGCCGGATGGCAGGCAATACCTTCTGCGTGTCTACTCGGGCCTCCTCTGCCAGT  
TCAACGAGAAGAGGGTCTTGAAAAGTGGATCAACCTGAAGGTCTCCCTGTCTTCTGCC  
TCTGCGTCAGCCAAGAACTCATCTTCTGCGGTGCACAGATGGGGTAGTCCGCATCTTCC  
AGGCCATAGCCTGCACTACCTCACCAACCTGCCCAAGCCTCACTACCTCGGGGTGGACG  
TGGCGCAGGGCCTGGAGCCCAGCTTCTCTTCCGCAGGAAGGCTGAAGCAATATATCCAG  
ACACGGTGGCGCTGACCTTTGACCCACCCACCAAGTGGCTGTCTGTGTATAAAGACC  
ACAGCTCTACATCTGGGATGTCCAGGACATCAACAAAGTGAAGCAAGATATGGTCAGAGC  
TATTCCATAGCTCCTACGTCTGGAATGTGGAGGTGTATCCTGAGTTTGAAGATCAGAGAG  
CTTGTCTGCCATCAGGATCTTTTTCTCACTTGTTCTTTCAGACAACACCATTTCGCTTCTGGA  
ACACGGATAGCAGCCCTGACTCTCACTGGCAGAAAAACATCTTCAGTAATACCCTCCTGA  
AGGTGGTATATGTGGAGAATGACACCCAGCACCTACAGGACACGTCACTTCCCAGACC  
GGGGGAGTGAAAACGGGACGCCCATGGATGTGAAAGCCGGGGTACGCGTCATGCAGGTCA  
GTCCTGATGGCCAGCACCTGGCTTCAGGCGACCGAAGTGGAAATCTGAGGATCCACGAGC  
TGCACCTCATGGACGAGCTGCTCAAGGTGGAGGCCATGATGCGGAGGTGCTGTGCCTGG  
AGTACTCCAAGCCTGAGACAGGGCTGACCTTGCTGGCCTCAGCCAGTCCGGACCGGCTGA  
TCCATGTGCTGAACGTGGAGAAGAATAACAACCTGGAGCAGACCCTGGACGACCACTCCT  
CCTCCATCACAGCCATCAAGTTTGCCGGCAACAGAGACATCCAGATGATCAGCTGTGGGG  
CTGACAAGAGCATCTACTTTTCGAGCGCCAGCGGGCCTCAGATGGACTACACTTTGTCC  
GAACCCACCACGTGGCAGAGAAGACCCTTTGTATGACATGGACATTGACATCACCCAGA  
AGTACGTGGCCGTAGCCTGCCAGGACCGGAATGTGAGAGTCTACAACACTGTGAACGGGA  
AGCAGAAGAAGTGCTACAAGGGCTCGCAGGGTGATGAAGGGTCCCTGCTGAAGGTCCATG  
TGGACCCCTCAGGCACCTTCTGGCCACAAGCTGCTCTGACAAAAGCATCTCAGTGATGG  
ACTTTTACTCCGGCGAGTGTGTGCGCAAGATGTTTGGCCATTTCAGAAATCGTCACTGGCA  
TGAAGTTCACCTACGATGCCCACCTGATCACAGTGTCCGGAGACAGCTGTGTGTTCA  
TCTGGCACCTGGGTCCGGAGATCACAGCTGCATGAAGCAGCACTTGTGGAGATAGACC  
ACCGGGAAGGATGGAACTGGAGCAGCCAGCCAGGTCTGGTGGCCACCTGACCAGCCCC  
CATCTGAGCAGGAGGCCTGTGCGTCCATGCCAGTGAGGCTCGTTCCATAAGCCCTGGAG  
AGCAGACAGAGGACGAGCTGGAGGAAGAGTGCGAACCTGAGGAGATGCTGAAGACGCCAT  
CCAAAGAGAGCTTGGACCCAGATCCTCGATGCCTGCTGACCAATGGCAAGCTGCCACTCT  
GGGCAAAACGGCTGCTAGGAGATGACGACGTGGCAGATGGTTCAGCCTTCCATGCCAAGC  
GCAGCTACCAGCCACACGGCCGCTGGGCAGAACGGGCTGACCAGGAGCCCCTCAAGACCA  
TCCTGGATGCCCGGGACCTGGATTGCTACTTACCCCATGAAGCCTGAGAGCCTGGAGG  
ACTCTGTCTGGACACAGTTGAGCCACAGAGCCTGGTGGACCTGCTCAGCGAGGGCTCTG  
ATGGGGATCCGGTGCTAAGACCAGGGCCTGGGCCCTTAGAGGTTCTGTTACATATGTTTT  
CAGAGTGTCCCAGGAGAACAGCTGTGGGCACCCTTCTTCTGCCCCTGCAGAGGGGGT  
CTGAGGCCAGTGAGCTTGTACCTACTCCCTGGAAGCAGCAGTGACAGTCTCAGGCACAG  
ACAGCAAGTACCGCGTTGGGGAGGAGGACGGGGGGCGTGCAGACCAGCAAGACGACTCCT  
ACCTCAGGATCTCCTCCACTGGCTCCAAGGCCAGAGCCCACCTGAAGACTCAGGGGAGT  
CAGAGGCAGACTTGGAGTGCAGCTTGGCCACCATCCACTCTTCCCGCCACGGCCTGATC  
CAGACCCTCGGTTTTGACGCGACGGTGTCCCACACACCAGGATGCCCCGGGCCTGCAGAAG  
AAGAGCAGGCCCTGCCCAGGGGGCCAGGCCTCACCAGCAGCTCTCTGCCCCAGACCCCCG  
AGCAGGAGAAGTTCCTCCGTCAACTTCGAGACGCTCGCCGACACCCAGCCTGAGGAGC  
TTTTCCACAGGTCCCTGAGAGACGTGACAGCCTCCGAGGCTGAGGACTTCTTCTCAATC  
CCCGGCTCAGCATCTCAGCCAGTTCTCTCACGCCTCCGGAAGAAACCCAGGTTCAACC  
ACACTTTCCCTCCCCAGCTGCCCTGCACCTCATGAAGTCTCAGAGGTCAATCCCATGG  
ACCAGGGGGGAAGCCAGCCCAGAGCAGAGCTGAGAGCAGGTAAGTGGCTACGCCTCCCCAG  
ACCAGACCAATGTCTCTCTGGCGGGGAGGCTGATGAGCTCCTTGGAGCCGTGGAAGCCT  
GGCACCCCTTGAACAGGAGGCCCGCTGCCTGCATCCATAACCCACCCAGGCCTGGCTC  
AGGGCGTCCGCGTTCCCTCCACCTGTTCTTACATGGAAGCCACAGCCAGCTCCCGTGCCA  
AGATGTACACAGCACCTCCCTCAGGGACCGTGTGGCCCTGTCCCGGCTGAGCTGGCCA  
GGCCCTCTGCAGGCCCTCCTCCATGGGGGAGCTGGCCTCCCTGGGCCAGGAGCTCCAAG  
CCGTCAACACCGGTAGCTCCAGCTCTGGCAGTGAGGGCCGGGAGCCTGCCCTGGCCT  
CCCGAGGCAACCATGAGGCCCGTGCCAACCTGAGACTGACCTTGTCAAGCATCTGTGACA



GCTTCCTGCTGCCCCATCCCCACTGGAGGCACCCACCACACGTGCCTGGTCCCAGGACC  
TGTGGCCACCCAGCCCTGTGCTACAGTCACAGCAGCCAGGCTCCTGGCCCCCAGCCCTGT  
GAACACAAGTGCCCTAAGGCTTCCCGACCCCTCCTTTCTCCCAAGGCTCCCTGCCCCCTCA  
GCCCCCTCAACCCTTCCACCCACCCTGGTAGCTCCCAGCTTCCAGAGACCAAGCCAGGAAT  
CTCTGGAAGCACTGCCTTCTCCTGGAGCCCACCGCTGATGCGCCCAGTCTGGTCCAGAG  
CAACCCTGGACACTGGGAGGAACCCGGGCTGCCAGCTGGGGTCTGCCCCCAGCTCCTCT  
TGAGCTGAGCGGTGTGGAGACCATCGTGCACAGGCTGCAGACTGCCTTCCAAGAAGCCCT  
TGACCTTTACCTTGTGCTGGTTTTCCAGTGGTCAGGTGAGCGCCGAGCAGCAGCAGACACG  
GACTGAGCTGGCCTCCACCTTCTCCTGGATCCACAGCCAGCTGGAGGCCCACTGGCTGGG  
AGGGACAGAGATGGCCCCAGCCCAGGCCCTGCCAGCCCAGGTCCACCTTCCCCACCTAC  
ACTCTGCCCCCTGGCTAGCCCAGATTTGCGGGCCCTGCTGGAACACTACTCGGAGCTGCT  
GGTGCAGGCCGTGCGCAGGAAGGTAGAGGGGGACTGA

>Equus caballus\_WDR62 (ENSECAT\_15354)

ATGGCGCCATAGGGCCCGGAGGCTTCGCGCGGAACGATGCAGTCGAGAAGCTGCCATCC  
GTCATGGCGGGAGTTTTGCGCGCGGAGGAGCCAGTCTCTCCGCCCCCTGCTCCACCGGTC  
TGCCTCCGGCGGCGGACGCGACCCTTGGCGGCACCCGAGGACACGATGCAGAACCGGGTG  
TCACTCGAGAAGGTGCTCGGCATCACAGCTCAGAACAGCAATGGCCTAACCTGTGACCCC  
GGCACAGGCCACGTGGCCTACCTGGCAGGCTGTGTGGTGGTGATTTTGAACCCCAAGGAG  
AACAAGCAGCAGCACATTTTTAATACTGCCAGGAAGTCTCTGAGTGCTCTGGCCTTCTCC  
CCTGATGGGAAGTACATAGTGACGGGGGAGAACGGGCACAGGCCTGCCGTGCGCATCTGG  
GACGTGGATGAGAAGAGTCAGGTGGCAGAGATGCTGGGCCACAAATACGGCGTGGCCTGT  
GTGGCCTTCTCCCCAACATGAAGCACATCGTGTCCATGGGCTACCAGCACGATATGGTG  
CTCAACGTCTGGGACTGGAAGAAAGGCATTTTTGGTGGCTTCCAACAAGGTCTCATGCAGA  
GTTATCGCCCTCTCCTTCTCCGAGGACAGCAGCTATTTTGTACCCGTTGGGAACCGGCAT  
GTGAGGTTCTGGTTCTTGGAAAGTCTCCACTGAGGCAAAGGTGACGGGCACGGTGGCCCTC  
GTGGGGCGCTCAGGCATCCTGGGTGAGCTGCACAACAACGTCTTCTGTGGTGTGGCTTGT  
GGCCGGGCGGATGGCAGGCAATGCCTTCTGTGTCTACTCGGGCCTCCTCTGCCAG  
TTCAACGAGAAGAGGGTACTAGAGAAGTGGATCAACCTAAAGGTCTCCTTGTCTTCTCTGC  
CTCTGTGTGAGCCAGGACTCATCTTCTGCGGCTGCACAGATGGGATAGTCCGCATCTTC  
CAGGCCACAGCCTGCACTACCTCGCCAACCTGCCCAAGCCACACTACCTCGGGGTGGAC  
GTGGCGCAGGGCCTGGAGCCCAGCTTCTTCCACAGGAAGGCAGAAGCAGTCTACCCA  
GATACAGTGGCGCTGACCTTCGACCCCATCCACCAGTGGCTGTCTGCGTGTATAAAGAC  
CACAGCATCTACATCTGGGATGTCAAAGACATCAACAAGTAGGCAAGATGTGGTCCGAG  
CTCTTCCACAGCTCCTACGTCTGGAATGTGGAGGTGTATCCTGAGTTTGAAGATCAGAGA  
GCTTGTCTGCCATCAGGATCTTTTTCTGACTTGTTCCTCAGACAACACCATCCGCTTCTGG  
AACATGGATAGCAGCCCTGACTCTCACTGGCAGAAAAACATCTTCAGTAATACCCTGCTG  
AAGGTAGTGTATGTGGAGAACGACATCCAGCACCTGCAGGACATGTCCCACTTCCCAGAC  
CGAGGGAGCGAGAATGGGACACCTCTGGACGTGAAGGCCGGGGTGCAGTGCAGGTC  
AGTCTGACGGCCAGCACTTGGCTTCCAGGCGACCGAAGTGGAATCTGAGGCAACTGCAC  
TTCATGGACGAGCTGGTCAAGGTGGAGGCCACGACGCCGAGGTGCTGTGCCTGGAGTAC  
TCCAAGCCCAGACGGGGCTGACCTTGTGGCCTCAGCCAGTCGGGACCGACTGATCCAC  
GTGCTGAACGTGGAGAAGAACTACAACCTGGAGCAGACCCTGGACGACCACTCCTCCTCC  
ATCACAGCCATCAAGTTCGCTGGCACCAGAGACATCCAGATGATCAGCTGTGGGGCTGAC  
AAGAGCATCTACTTTTCGAGTGGCCAGCAGGCCTCGGATGGACTACACTTTGTCCGTACC  
CACCACGTAGCAGAGAAGACCACCTTGTATGACATGGACATTGACATCACCCAGAAGTAT  
GTGGCTGTGGCCTGCCAAGACCGCAATGTAAAGTCTACAACACGGTGAACGGGAAGCAG  
AAGAAGTGCTATAAGGGCTCCAGGGTGACGAGGGCTCCCTGCTGAAGGTCCACGTGGAC  
CCCTCAGGCACCTTCTGGCCACAAGCTGCTCTGACAAAAGCATCTCCGTGATCGACTTT  
TACTCGGGCGAGTGCATTGCCAAGATGTTTTGGCCATTTCAGAAATCGTCACCAGCATGAAG  
TTCACCTATGACTGTGCTCACTTGATCACAGTGTCTGGAGACAGCTGCGTGTTCATCTGG  
CACCTGGGCCCCGAGCTCACCAACTGCATGAAGCAGCACTTGTGGAGATCGACCGCCGG  
GAGCAGCAGCGGCAGGAAACGAAGGACGGGATGTGGAGCAGCCAGCCCAGGCAGGAGACA  
TATGTATCCATGCCAGCGAGACATGCTCCCTAAGCCCTGGAGAACAGACGGAGGATGAG  
CTGGAAGACGAGTGTGAACCTGAAGAGTTGCTGAAGACACCGTCCAAGGAGAGCTTGGAT  
CCAGATCCTCAGTGCCTGCTGACCAACGGCAAGCTGCCACTCTGGGCAAAGCGGCTGGTG  
AATGACGATGATGTGGTGGATGGCTCAGCCTTCCATGCCAGGCGCAGCTACCAGCCGCAT

GGCCGCTGGGCAGAGCGGGCTGACCAGGAGCCCCTCAAGACCATCCTGGATGCCCGGGAC  
CTGGATTGCTACTTTACCCCCATGAAGCCCCGAGAGCCTGGAGGACTCCCTTCTGGATACA  
GTGGAGCCACAGAGCCCGGGCGGCCTGCTGAGCGAGCCCGAGAGTCCCCGGGACGATGGC  
TGTGGGCATCCCTCCTTCTGCCCCCTACAGAGGGAGTCTCTGAGGCCAGCGAGCTCATC  
ATCTACTCCCCAGAGGCGGAGGTGACGGTCACAGGGACAGACAGCGAGGACTGTGCGAAG  
GAGGGGATGAGGGAGCCCCGGAGACCAGCAAGGCGACTGCTACCTCCAGGTCCCCCTCCATC  
GGCTTGAAGCATCAGAGCCCACCTGAGGACTCAGGGGAGTCAGAGGCCAACTTGGAGTGC  
AGCTTCGCCACCATCCACTCCTCCCCCTCCACAGCCGGACCCAGACCCTCGATTTGACCCA  
TTAGCTTTCCCTTCTCGGCCTGGATGCCCAGGTACCGCAGAAGAGTTGTCCCAGCCCCGAA  
GTGCCAAGCATTTCACACGGCTCCCTGCCCCAGACCCTGAGCAGGAGAAATTCCTCCG  
CACCATTTCGAGACATTTACTGACGCCCCCTGAGGAGCTCTTCCACGGATCCCTGAGG  
GACGTGCAGGCCTCTGAGCTGAGGACTACTTCAATCCCCGGCTGAGCATCTCGGCCAG  
TTCCTCTCCCGCCTCCAGAACACATCCAGGTTTCAGCCACACCTGCCCTCCCCAGCTGCC  
CTGCACCTTGGGAAGCCCCCAGAGGTCAAACGGTCAGACTTCAGAGGGAGCCAGCCCAGA  
GCAGAGCCCCCAAGAGTGGATGCTGGTTGCACCTCCCCGGGCAGGACCAGTGTCTCTCT  
GTGGGGATGGCTGAGGAGCCCCCTCGAGCCCCCTGGAGGCCTGGTGCCCACTGACCCCCCTGC  
CTCACAGGCCTGCCACCATGTGTCCCCTCCTCCTCAGTGCTGCCACAGACGGGAAGCCT  
CTGACGCCCACAGCCCTACCCACTCCAGGCCTGGCTCAGGAGGTCTGCACCCCCCTCCACC  
CGCTCCTACCTGCAGACCACTGCCAGCTCCCGTGCCAAGATGTCACGTAGCATCTCTGTC  
GAGGACAGGGAGAGCCCTGTCTGGCTGAGCTGCCAAGACCCTCCGCAGACCCTCGTCC  
ATGGGGGAGCTGGCCTCCCTGGGCCAGGATCTCCAGGCTGTGAGCACAGCAGCACCCAGT  
TCTGACAGCGAGGCCAAGAGCCTGCCCTGCCCTCCTGGGGCAACCATGAGGCCCGAGCC  
AGCCTGAAACTGACCCTGTGCAACATATGTGATGGGCTCTTGCTGCCCCCACCCTGCTG  
GAGCCTCCTACCACGTGCGTCTGGTCCCAGGAACCTGTAGCCACCAGCCTGATGTCATG  
GCCGCAACAGCCAGCTTCCCTGGCCCATAGCCCCATGGATGGGAGCACCCCTGAGGCTCCAC  
AACTCCGCCTTTCTCCCAAGGCTTCCAGCCCCCTGAGCCCCCTCAACACCCTGCCACCCC  
AACAAGCCCCCGCTTCCAGAGGCCAGTCTGGGGCCCCCTGGCAGCATCACCTCCCTCCTG  
GAGCCCACTCCTGGTGAGTACCACCCTCAGGATAAGGGATTTGACCACTGTGGCAGCCCC  
AGACCGTGGGGGAGCCTGGGATGCCGGCTCCCCTTGAGCTGAGCAGTGTGGAGACCATT  
GTGCACAGACTGCAGACTACTTCCAGGAAGCTCTGGACCTTTACCACCTGGTGGTCTCC  
AGTGACCAGGTGAGCGCTGAGCAGCGGCAGGCCCGACTGAGCTGGCCTCCACCTTCCAC  
TGGATCCACTGCCAGTTAGAGGCCAATGACTGGCTGCTTGGAACTGATGTGGCCCCAGAC  
CAGGCCCTGCCTAGCCCAGGGCCCCCTTCCCCCCTACATTGTGCCCCCTTGCCAGCCCC  
GATTTGCACGCCCTGCTGGAACACTACTCGGAGCTGCTGGTGCAGGCTGTGCGGAGGAAG  
GCCCGGGGGGACTGA

>Sarcophilus harrisii\_WDR62 (ENSSHAT\_12622)

ATGGCGGGCAACACCTTCTGTGTGCTCCTACTCCGGTCTCCTCTGCCAGTTTAAATGAGAAG  
AGAGTCTTGAAAAGTGGATCAACTTAAAGGTCTCCCTTTTCATCTTGCCTGTGTGTCAGT  
GAGGATCTCATCTTCTGCGGCTGCACTGATGGGACGGTCCGCATCTTCCAGGCACATGAC  
ATGCATTATGTGACCAACTTACCCAAGCCCCACTACCTGGGAGTGGATGTGGCCCAAGGC  
CTGGATCCCAGCTTCTCTTTCAGTAGGAAGGCCAGTCCGGTCTACCCAGACACGGTGGCT  
CTGGCCTTTGACCCCCACCACCACTGGCTCTCGTGCGTGTACAAGGACCACAGTATCTAT  
GTTTGGGACATCCTTGACCTAACTAAAGTGGGCAAAGTGTGGTCCGATCTTTTCCACAGT  
TCCTACGTCTGGAATGTTGAGGTCTACCCAGAGTTTCAAGACCAGAGAGCCTGTCTGCCC  
TCCGGATCGTTTTCTGACCTGCTCCTCAGACAACACCATCCGCTTCTGGAACATGGAGAGC  
AGCCCCACTTCCGGCCGGCCCCAAGAACGTTTTTCAGTAACAACCTGCTAAAGGTGGTATAT  
GTAGAAAATGACATCCAGCACCTGCAAGACATATCCCATTTCCAGACCAGGGGAATGAG  
AATGGGACTCCTGTGGACATGAAGTCAGGAGTGCGGGTATGCAGGTGAGTCTGATGGT  
CAGCACTTGGCCTCAGGCGACCGCAGTGGAAATCTGAGGATTCATGAGCTCAGGTTTCATG  
GATGAGCTGATTAAGGTGGAGGCCCATGACGCAGAAGTTTTGTGTCTGGAATATTCCAAA  
CCTGAAACTGGGGTGACATTGCTGGCCTCTGCCAGTCCGGACCGGCTCATCCACGTGCTC  
AATGTGGACAAGAATTATAACTTGGAAACAAACCCTGGATGACCATTCTCCTCAATCACA  
GCCATCAAATTTGCAGGGAACAGAGACATCCAGATGATAAGCTGTGGAGCTGACAAAAGC  
ATCTACTTCCGCAGTGCCAAAAGTTTTCCGATGGCCTTCATTTTGTACGCACCCATCAC  
GTGGCAGAGAAAACCTTGTATGACATGGACATCGATATCACCCAGAAATATGTGGCT  
GTGGCCTGTGAGGACAGGAATGTGAGAGTCTACAACACGGTCAATGGCAAACAGAAGAAA  
TGCTACAAGGGTTCTCAGGGGGACGATGGCTCCTTGCTGAAGGTGCATGTTGACCCTTCG

GGCACCTTCCTAGCCACCAGTTGTTCTGACAAGAGCATCTCGGTGATTGACTTCTATTCT  
GGAGAGTGCATTGCCAAGATGTTTGGACATTGAGAAATTGTCACAGGCATGAAGTTTACT  
TATGACTGTGCGCACCTGATCACTGTGTCTGGAGACAGTTGTGTCTTTATCTGGCAGCTG  
GGCCCGGAGATCACCAGCTGCATGAAGCAGCACCTGATGGAGATCGATCACATTGAGCAG  
CAGAAGAAGCTCAAAGAGAGAAAGTGGACCAGCCAGCTGAGGCGGGAAACTTACATGTCT  
GTGCCCAGCGGGACTTGTTCCTGAGCCCTGGAGAGCAAACGGAGGATGAACTGGAAGAG  
GAGTGTGAGCCAGAGGAGCTACTGAAGACCCCCACCAAAGACAGCTTTGAGACAGATCCC  
CGATGTCTGCTGACCAATGGCAAGCTTCCCCTCTGGGCTAAGCGGTTGCTGGGGGATGAG  
GATGTGGATGGGGCCACGTTCCATGCCAAGCGGAGCTACCAGCCCCACGGCCGCTGGGCT  
GATCGGGCTGACAGGGAGCCCATCAAGACCATTCTGGATGCCCGGGACCTGAATTACTAT  
TTCAGCCCCGTGAACCCCCGACGTGCTGGAAGACTCTGGCCTGGAGAAGGTGGAGCCACAG  
AACCTGGCCAGCTGCTCAATGAGACAGAGGGCCAAGAGGATCCAAGCCAGACGGAAGGT  
GGATTCCAGTGCCCTGACTTCTCCAGTTGGATCTGGAGTCTTCTAAAGAGAGTGACATC  
ATCATTTACACCCTGGAGCCAGAGGCCCTCCCCGAGAAGAGGCTCCAAAGTGAGTACCAT  
ATGAAGGAAGTGGACATCCCCCCTCTCAGCGGGCAATGGGTATCTGCGAGTCGGCTCC  
GTTCTGAAGGGGGACCTGGACAGCCGTGTGCGGGAGCTCCAGCCTGAAGGTGGGGACTCG  
CTCGAGTCTGAGGCTGAAACGGAAGTGGAGCCCGCTGACCTGGAAGGCAGCTTCAAAGCC  
ATTCACCTCCTCACCCCCCAGCCCAAGGCCGAGAAGAGCCCTCTGGAGCTGATGCCCTTA  
GTCCCAGACGCAGAGAGCACATTGGAAGTGGAGCTCATCGACCCGAGGGGCCCCGTGCC  
CCCAGCAGCTCTTTGCCGAGACCCCAGAGCAGGAGAAGTTTCTCAGGCACCATTTTGAA  
ACCCTCACTGATGCCCATCCTGAAGGTTCCCTGAAGGACATGGAGGCCCTGAGGTAGAC  
ACGGAATCTGAGAAACATTTCTTCTCAACCCTCGCCTGAGCATTTCTGCCAGTTTCTT  
TCTCGATTCCAGAAAAGCCCCAGGTTTGCGCACACCTTCCCACCGACGTTGCCCTTTCAG  
TTAGTGAAGCCGCTGGAGGCTGTGGCACTTGGCCGGGATGGGCCCGAGGCCAGAGGAGC  
TATGAGGCCGAGACGCCTCTGATGGACTCCTTGGTGGGAAGGCAGCCAAGAGCACGGAG  
ACCCAGCACCTGCGTCTGGTGGCCACTGATCTCTGGCGTCACTGGCATGGGGTCCAGGC  
CCACCCTCAGAAGCTCTCATGGGCCCTCCCTGGAGGAAGAGAGGGCAAGAAAATCGAAG  
CAGTACCTCCACTCCCCTGCACCCTGGCCCGGGGTGGCCGAGAGCCCCGGGCCGCTCC  
TACCTGGAGTCCACCACGAGCTCCCGAGCCCAAGATGTCCCAGAGTGTCTCTCTTTGGAGAA  
AACCTCACCCGACCCTGACAGAACCCCCCAGCCCCAAATGGCCTGAGGAGCCCTCTG  
TCCATGGGAGAACTCTCGATGTTGGGGCAGGATGGTCCAGCCGAGCCCGCCAGAGAGCCG  
AGTGCCCCAGAGCGGGGCCCGGACCTGCCCTGTGGGGTAATCATGAAGCCCGAGCCAGC  
CTGAGACTGGACCTGCCCAATGTCTGTGACCCGCTCCGGATGCCTCCCCGCTCCCCACCC  
CCTGCTCCCCGCCCCAGCCCCGAGGCCTCCAGAGATGAAGGCCATGGGCCTCTATGAGCCT  
GGCTTCCCTCCACAGGCTGTGCGGAGCCCAGCCACCAGTTCCAGGCCCTCCCCGAGGGCCCCG  
GCAGCCATAGAATCTGTGGGGCCTAGGGGCATCGCTTCTGAAACCCCCCTCTTGGAACCT  
CCCTCTGGTGAAGTGTGACCACCCCAAGGGCTCGCCCCCTCCACCCCCGGCCCAGAGGCCT  
GGACTGGGGCCGTCCACATTGCCACCATGAGGAATGTGGAGAGCGTCACCCAAAAGCTG  
CAGCGCAGCTTCCAGGAGGCCCTGGACCTTTACAAGATGGTGGTTTTCCAGCCCTCAGATG  
AGCGGAGAACAGCAGCAAATTCGGGCAGAATTGTCTACCTTCTGTGGATCCAGGGC  
CAGCTGGAAGCCATGACCTGGCTTGGGGTTTTCCCCTTCCCCTGCCACAAGCCCAGCCCCA  
GGCCTTCCGTCCCCTCTCCTGTGGTCTTGGCCAGCTCAGAGGTCCGGGCCCTGTTGGAA  
CACTACTCAGAGCTGTTGGTGCAGGCGGTCCGAAGAAAGGCGGGTGGCAGG

>Orcinus orca\_WDR62 ( XM\_004284157.1)  
ATGGCGCCTTGGGGCCCCGAGGCTACGCGGGAACGATGCAGTCGAGAAGTTGCCATCC  
ATCATGGCGGGAGTTCCGGCGCGGAGGGCCCAGTCCCTCCCCGCCCCCGTTCTACCGCTC  
TGCCTCCGGCGGCGGACGAGACTCTCGGCGGCGCCCCGAGGACACGGTGCAGAACCGGGTA  
TCACTTGAGAAGGTGCTTGGCATCACAGCCAGAACAGCAATGGCCTAACCTGTGACCCC  
AGCACAGGCCATGTGGCCTACCTGGCAGGCTGTGTGGTGGTGATTTTGAACCCCAAGGAG  
AACAAGCAGCAGCACATTTTTAATACAGCCAGGAAGTCTCTGAGTGCCCTGGCCTTCTCC  
CCTGATGGAAGTACATAGTGACGGGGGAGAACGGGCACAGGCCTGCTGTGCGCATCTGG  
GACGTGGAAGAGAAGAGTCAGGTGGCGGAGATGCTGGGCCACAAGTACGGTGTGGCCTGT  
GTGGCCTTCTCCCCAGTATGAAGCACATTGTGTCCATGGGCTACCAGCACGACATGGTA  
CTCAACGTCTGGGACTGGAAGAAAGACATCGTGGTGGCCTCCAACAAGGTATCATGCAGG  
GTCATTGCCCTCTCCTTCTCCGAGGACAGCAGCTATTTTGTCACTGTTGGGAATCGGCAT  
GTGAGGTTCTGGTTCTTGAAGTCTCCACTGAAGCAAAGGTGACGAGCACAGTACCCCTC

GTGGGGCGCTCAGGCATCCTGGGTGAGCTGCACAACAACGTCTTCTGTGGTGTGGCTTGT  
GGCCGGGGCCAGATGACAGGCAGTACTTTCTGTGTGTCTACTCGGGCCTCCTCTGCCAG  
TTCAACGAGAAGAGGGTGTAGAGAAGTGGATCAACCTAAAGGTCTCGCTGTCTTCTGC  
CTCTGTGTGAGCCAGGAGCTCATCTTCTGCGGTTGCACAGATGGGATAGTCCGCATATTC  
CAAGCCCACAGCCTGCAGTACCTCGCCAACCTGCCCAAGCCGCACTACCTTGGAGTGGAT  
GTTGCCCCAGGGCCTGGAGCCCAGCTTCTTTTTTCAGCAGGAAGGCAGAAGCCATCTACCCG  
GATACAGTGGCGCTGATCTTCGACCCCATCCACCAGTGGCTGTCTGTGTGTATAAGGAC  
CACAGCATCTACATCTGGGATGTCAAAGACATCAACAAAGTAGGCAAGGTGTGGTCAGAG  
CTCTTCCACAGCTCCTACGTCTGGAATGTGGAGGTGTATCCTGAGTTTGAAGATCAGAGA  
GCTTGTCTGCCATCAGGATCTTTTTCTGACTTGTTCCTCAGACAATACCATCCGCTTCTGG  
AACATGGACGGCAGCCCTGACTCTCACTGGCAGAAGAACATCTTCAGTAATACCCTGCTG  
AAGTTTGTGTATGTGGAGAATGACATCCAGCACCTGCAGAACATGTACACTTCCCAGAC  
CGGGGGAGTGAGAATGGGATGCCTGTGGACATGAAAGCTGGGGTACGAGTCATGCAGGTC  
AGTCTGTATGGCCAACACTTGGCTTCAGGCGACCGAAGTGGAAATCTGAGGATCCACGAG  
CTGCACTTCATGGACGAGCTGGTCAAGGTGGAGGCCCATGATGCTGAGGTGCTGTGCCTG  
GAGTACTCCAAGCCTGAGACAGGGTTGAGCTTGTGGCCTCAGCCAGCCGGGACCGACTG  
ATCCACGTGCTGAACGTGGAGAAGAATAACAACCTGGAGCAGACCCTGGATGACCATTCC  
TCCTCCATCACAGCCATCAAGTTTGTGGCCACAAGGACATCCAGATGATCAGCTGTGGG  
GCAGACAAGAGCATCTACTTCCGCAGTGGCCAGCAGGGCTCAGATGGACTACACTTTGTC  
CGTACCCACCACGTGGCAGAGAAGACCACCTTGTATGACATGGACATTGACATTACCCAG  
AAGTACGTGGCTGTGGCCTGCCAGGACCGCAACGTAAGAGTCTACAACACCATGAACGGG  
AAGCAGAAGAAGTGCTACAAGGGCTCCCAGGGTGATGAAGGGTCCCTGCTGAAGGTCCAT  
GTGGACCCCTCAGGCACCTTCTGGCCACAAGCTGCTCTGACAAAAGCATCTCGGTGATT  
GATTTTTACTCCGGGGAGTGCCTTGGCAAGATGTTTGGCCATTGAGAAATCGTCACCCGGC  
ATGAAGTTCACCTACGATTGTGCTCACTTGATCACAGTATCCGGAGACAGCTGCGTGTTC  
ATCTGGCACTTGGGCCCCGAGATCACCAGCTGCATGAAGCAGCACTTGTGGAGATTGAC  
CACCGTGAGCAGCAGCAGGAGAACACGAAGGGCAGGAACGGAGCAGCCACCCAGGCAG  
GAGACATATGCATCCATGCCAACGAGATTTGCTCCCTAAGCCCTGGAGAGCAGACGGAG  
GATAAGCTGGAGGAAGAATGTGAACCTGAAGAGTTACTAAAGACACCATCAAAGAGAGT  
TTGGATCCAGATCCTCGGTGCTGCTGACCAACGGCAAGCTGCCACTCTGGGCAAAGCGG  
CTGCTAGGAGATGATGATGTGGCAGACAGCTCGGCCTTCCACGCCAAGCGCAGCTACCAG  
CCACATGGCCCGTGGGCGGAGCGGGCTGACCAGGAGCCTCTCAAGACCATCCTGGATGCC  
CGGGACCTGGATTGCTACTTTACCCCCATGAAGCCCCGAGAGCCTAGAGGATTCTGTTCTA  
GATACAGTGGAGCCGCAGAGACTGGCGGGCCTGCTGAGCGAGTCAGAGAGTCCCCAGGAC  
AATGGCTGTGGGCCTCCCTCCTTACCGCCCCCTACAGAGGGAGTCTTCTGAGGCCAGCGAG  
CTCATCATCTACCCCTGGAGACAGAGGTGACAGTACAGGGACAGACAGCAAGTACTGT  
GCGGAAGAAGTAGAGAGGGCGCCAGGAGACCAGCAAGGTGACTCCTACCTCAGGGCCCCC  
TCCATCGACTCGAAGGACCAGAGGCCACCTGAGGACTCAGGGGAGTCAGAGGCCGACTTG  
GAGTGCAGCTTTACCACCATCCATTCTCCCTCCACAGCCAGACCCAGACCCCTCAGTTT  
GATGTGACGCCCCCTACACCAGGATGCCAGGTACCACAGAAGAGTTGTCCAGCCCGAG  
GTGCCAAGCATATCCAACGGCTCCCTGCCCCAGACCCCTGAGCAAGAGAAGTTCTCCGC  
CACCCTTCGAGACACTTACTGACGCCACCCTGAGGAGCCCTTCCACGGATCCCTGAGA  
GACCTGAAGGCCTCTGAGGCCGAGGACAACCTTCTCAATCCCCGGCTGAGCATCTCAGGC  
CAGTTCTCTCCCGCCTCCAGAAGACATCCAGGTTACCCACACCTTCCCTTCCCGGCTG  
CCCCTGCACCTCGTGAAATCCCCAGAGGTCAAACCTCATGGATCTCAGGGGGAGCCCGCCC  
AGAGCAGAGCCCCCTGAGAGCAGGTACTGGCTACACCTGCCAGGCAGGACCAATGTCATC  
TCTGGGGGAAAGGCTGAGGAGCCCCCTCGAGACCCTGGAAGCCTGGTCCCCACTGACCCCC  
TGCCTCACAGGCCTGGCGCCCTGCATCCTGCCCTCCTCTGTGCTGCCACAGACAAGAAG  
CCTCCGACACCCACAGCTCTACCCACTCCAGGCCTGGCTCAGGGTTTTCCACACCCCGCC  
GCCCGCTCCTGCATGGAGGCCACTGCCAGTTCTGTGCCAGGATAACCACACAGCATTTC  
ATTGAGGACAGTGAGGGCCCTGTCTGGCTGAGCTGGCCAGGCCTCTGTGCAGGTCTCTG  
TCCCTGGGGGAGCTGGCCTCCCTGGGCCAGGAGCTCCAAGTCATTACCACCACAGTGACA  
CCCAGTTCTGACAGTGAGGGCCAAGAAGCTGCCCTGCCCTCCCGGGCAACCATGAGGCC  
CGCGCCAGCCTGAAACTCACCTGCCAAGCATCTGTGACAGGCTCGTGTGGCCCCACCC  
CAACTGGAGCCTCCACCACGTGTGTCTGGTCCCAGGAGCCTGTGGCCATCCAGCCCAAT  
GTCATGGTCACAACAGCCAGCTTCTGGCCCCAGCCCTGTGGATGGGAGTGCCCCAAGA  
CTCCACAACGCCACCTTTCTCCAAGTTCTGGCCACCGAGGCCCTCAATACCCCTTCC

CATCCCAACAGCCCCCACTTCCAGAGGCTAGGCCTGGGGTCCCTGGCAGCATCACCTCC  
CTCCTGGAGCCCACCCCTGATGCGCTCAGTCCAGTCCAGGGCTGCCCTGGACACTGCGGG  
GAACCGAGGGGGCCAGCCAGGGTACTGCCCCAGATCCCCTTGAGCTGAGCAATGTGGGG  
ACCGTCGTGCACAGACTGCAGACTACCTTCCAAGAAGCCCTGGACCTTTACCACCTGATG  
GTCTCCAGTGACGAGGTGGGCGCCGAGCAGCAGCAGGCACGGACTGAGCTGGCCTCCACT  
TTCCTTTGGATCCACAGCCAGTTAGAGGCCAACGACTGGCTGGTTGGGACCGATGTGGCC  
CCAGCCCAGGCCCTGCCAACCCAGGCCCCCCCTCCCCACCTACACTGTGCCCCCTGGCC  
AGCCCAGACTTGCGTGCCCTACTGGAACACTACTCAGAGCTGCTGGTGCAGGCCGTGCGG  
AGGAAGGCACGGGGGGACTGA

>Pteropus alecto\_WDR62 (XM\_006905949.1)

ATGGCGACCTTGGGGCCCGAGGCTACGCGCGGAACGATGCAGTCGAGAAGCTGCCATCC  
GTCATGGCGGGGGTTCCAGCGCGGAGGGGCCAGTCCCTCCCCGCCCCCGCTCCAGCGCTC  
TGCCTCCGGCGACGGACCCGACTCCCCACGGCGCCAGAGGATACGGTGCAGAACC GGGTG  
TACTGGAGAAGGTGCTCGGCATCACAGCCCAGAACAGCAGCGGCTTAACCTGTGACCCC  
AACACAGGCCATGTGGCCTACCTAGCAGGCTGTGTGGTCTGTGATCTTGGATCCCAAGGAA  
AACAAGCAACAGCACATTTTTAACTGCCAGGAAGTCTCTGAGCGCTCTGGCCTTCTCC  
CCTGATGGGAAGTACATAGTGACGGGGGAGAATGGACACAGGCCTGCTGTACGCATCTGG  
GACGTGGATGAGAAAAGTCAGGTGGCGGAGATGTTGGGCCACAAGTACGGCGTGGCCTGT  
GTGGCCTTTTCCCCAATATGAAGCACATCGTTTTCCATGGGCTACCAGCACGACATGGTA  
CTCAATGTCTGGGACTGGAAGAAAGATGTTGTGGTGGCCTCCAACAAGGTATCATGCAGA  
GTCATCGCCCTCTCTTTCTCAGAGGACAGCAGCTATTTTGTACAGTTGGAAACCGGCAC  
GTGAGGTTCTGGTTCTTGAAGTCTCTACTGAAACAAAGGTGACAGGCACGGTGGCCCTC  
ATAGGGCGCTCAGGCATCCTGGGTGAGCTGCACAACAATGTCTTCTGTGGCGTGGCTTGT  
GGCCGGGGCCAGATTGCAGGCAATACCTTCTGTGTGCTACTCGGGCCTCCTCTGCCAG  
TTCAACGAGAAGAGGGTGTGGAGAAGTGGATCAACCTGAAGGTCTCCCTGTCTTCTTGC  
CTCTGTGTGTCAGCCAGGAGCTCATCTTCTGTGGCTGCACAGATGGGATAGTTTCGCATCTT  
CAGGCCACAACCTGCAATTACCTTGCCAACCTGCCAGGCCACACTACCTTGGTGTGGAT  
GTGGCCAGGGCTTGGAGCCCAGCTTCTCTTCTGCGAGGAAGACAGAAGCAGTCTACCCC  
GATACAGTGGCGCTGACCTTGCACCCATCCACCAGTGGCTGTCTGTGTGTATAGGGAC  
CACAGCGTCTATATCTGGGATGTCAAAGACATCAACAAAGTAGGCAAGATGTGGTCAGAG  
CTCTTCCACAGCTCCTACGTCTGGAACGTAGAGGTATATCCTGAGTTTGAAGATCAGAGA  
GCTTGTCTGCCATCAGGATCTTTTTCTGACTTGTTCCTTCCAGACAACACAATCCGCTTCTGG  
AACATGGATAGCAGCCCTGACTCTCCCTGGCAGAAAAACATCTTCAGTAATACCCTACTG  
AAGGTAGTGTATGTAGAGAATGATATCCAGCACCTGCAGGACATGTCACACCTCCCAGAC  
CGGGGGAGTGAGAATGGGACACCTATGGATGTGAAAGCTGGGGTACGAGTCATGCAGGTC  
AGTCTGTATGGCCAGCACTTGGCTTCCAGCGACCGAAGTGGAAATCTGAGGATCCATGAG  
CTGCACTTCATGGATGAGGTGGTCAAGATGGAGGCCACGATGCTGAGGTGCTATGCCTG  
GAGTACTCCAAGCCTGAGACAGGGCTGACCTTGTGTCCTCAGCCAGTCGAGACCGACTG  
ATCCATGTGCTGAACGTGGAGAAGAACTACAACCTGGAGCAGACCTTGGATGACCACTCC  
TCCTCCATCACGGCCATCAAGTTTGGCGGCAACAGAGACATCCAGATGATCAGCTGTGGG  
GCCGACAAGAGCATCTATTTCCGCAGTGCCAGCGGGCCTCAGATGGGCTCCACTTTGTT  
CGTACCCACCATGTGGCAGAGAAGACCACCTTGTATGACATGGACATTGACATCACCCAG  
AAGTACGTGGCTGTGGCCTGTGAGGACCGCAATGTGAGAGTCTACAACACCGTGAATGGG  
AAGCAGAAGAAATGCTACAAGGGCTCCCAGGGTGACGAAGGGTCCCTGCTGAAGGTCCAC  
GTGGACCCCTCGGGCACCTTCTGGCCACAAGCTGCTCTGACAAAAGCATCTCGTGATT  
GACTTTTACTCTGGCGAGTGCATCGCCAAGATGTTTGGCCATTCTGAAATCGTCACTGGC  
ATGAAGTTCACCTATGATTGTGCTCACTTGATCACAGTATCTGGAGACAGCTGTGTGTTT  
ATCTGGCACCTGGGCCCCGAGATCACCAACTGCATGAAGCAGCACTTGTGGAAATCAAC  
CATCGGGAGCAGCAGCAGCAGAATACCAAAGACGGGAAGTGGAGCAGCCACCCCAGACAG  
GAGACATATGCATCCATGCCAGTGAGATTTGTTCCCTAAGCCCTGGAGAGCAGACAGAA  
GATGAGTTGGAGGAAGAGTGTGAACCTGAAGAGTCTGCTGAAGACACCATCCAAAGAGAGC  
TTAGATCCAGATCCTCGATGCCTGCTGACCAATGGCAAGCTGCCACTGTGGGCAAAGCGG  
CTGCTAGGAGACGACGATGTGGCAGATGGCTCAGCCTTCTATGCCAAACGCAGCTACCAG  
CCCCATGGCCGCTGGGCAGAGCGGGCCAACCAGGAGCCCTCAAGACCATCCTGGATGCC  
CGCAGCCTGCATTGCTACTTTACCCCCATGAAGGCTGACAGCCTGGAGGACTCTGTTATA  
GATACAGTGGAGCCGAAAGCCTGGCAGGCCTGCTGAGTGTGAGTGCAGAGTCCCCAGGAA

GATGGCCACAGGGATCCCTCCTTCTGCTGCCCCACAGAGGGAGTCTCTGAGGCCAGT  
GGGCTCATCTCTTCTCCTTGGAGGCAGAAGTGACAGCCCCAGGGAAAGACAGCAAGTAC  
TTCGAGAAGGAGGTGGAGGGGGAGCCTGGAGACCAGCAAGGTGACTCCTACCTCAGAGTC  
TCCTCCATCGGCTCGAAGGATCAGAGCCCACCTGAGGATTGAGGGGAGTCAGAGGTCGAC  
CTGGAGTGCAGCTTCACTACTATCCATTCTCCCTCCACAGCTGGAATAAATGCTCAG  
TTTGACATGACATTGACCCCCACACCAGAACGCCAGGAACCGCAGAGGAGTTGACCAGG  
CCTGAGGTGCCAGGCATATCTAATGGCTCCCTGCCCCAGACCCCTGAGCAAGAGAAGTTC  
CTCCGCCATCACTTTGAGACACTTACTGATGCCCCACCCTGAGGAGTTCTTCCACAGATCC  
CTAAGAGATGTGAAGGCCTCTGAGGATGAGGACTTCTTTAATCCACGGCTGAGCATTTC  
GCTCAGTTCTCTCACGCCTCCAGAAGACATCCAGGCTCACCCACACCTTCCCTCCTCGG  
CTGCCCTGCACCTTGTGAAGTCCCCAGAGGTGAGACTCACAGACCTCGGGGGGAGCCAG  
CCCAGAGCGGATCCCCTGAGAGCAGGTAAGTGGCTGCACCTCCCCAGGCAGGACCAATGTC  
CTCTCTGGGGGAAGGCTCAGGAGTCCCTTGACACCCCGAGGCCTGGTGCCCACTGATT  
CTGCCACAGACAGGAAGCCTTCGACACCCCCAGCTCTACCCACACCAGTTCTGGCTCCG  
AGTGTCTCTCGCCCTCCACCTGCTCCTACATGGAGCCCACTGCAAGCTCCCGTGCCAAG  
GTGTACGCAGCATCTCCCTTGAGAACAACGAAGATCCCGTCTGGCTGAGCTAACCAGG  
CCCGTCCACAGGCCGTATCCATAGGGGACCTGGCGTCTCTGGGCCAGGAGCTCCAGGCC  
ATCACCCTACGGCAGCACCTGACAGTGAGGGCCATGAGCCTGCCCTGCCCTCCCGGGGC  
AACCACGAGGCACGGACCAGCCTCAGACTGACCCTGTCAAGTGTCTATGACAGGCTTTTG  
CTGCCCCACCCCACTGGAGCCATCCAGTACTTGTGTCTGGTCCAGGAACCTGTGGCC  
ACCCAGCCTAATGTTATGGTCAACAAGCTAACTTCCCGGCTCCAGTCCCGTGGATGTG  
AGTTCTCTGAGGCTCCACAGCTCCACCTGTCTCCAAGGCTCCTGGTCCCTGAGCCCTC  
AACACCCATCCCAGCAGCCCCCACTTCCAGAGGCCAGGCCTGGGGTTTCTGGCAACATC  
ACTACCTCTTGGAGCTCACTCCAGATGCGCTCAGTCTGGTCCGGGACAACCTGGACAC  
TGGAGGGAGTCCAGGGTACCAGCCAGGGTCTGTCTCAGCTTCCCTTGAGCTGAGCAGT  
GTGAGGACCATCGTGTACAGGCTGCAGACTGCCTTCCAAGAAGCCCTGGACCTTTACCAC  
CTGATGGTCTCCAGGGACCAGATGAGCACCGAGCAGCGGCAGGCACAGACTGAGTTGGCC  
TCCACCTTCTTTGGATCCACAGCCAGTTAGAAGCCAACGACTGGCTGGTTGGGACCAAT  
GTGGCCCCAACCCAGGCCCTGCCAGCCAGTCCCCCTCCCCACCTACACTGTGCCCC  
CTGGCCAGCCCCGATTTGCGTGCCCTGCTGGAACACTACTCAGAGCTGCTGGTGAAGCT  
GTGCGGAGGAAGGCACGAGGATACTGA

>*Oryctolagus cuniculus*\_WDR62 (ENSOCUT\_29475)

ATGGCGGCCTTAGGGCCCCGAGGCTACGCGCGGAACGATGCAGTCGAGAAGCTGCCATCT  
GTCATGGCGGGAGTTCCGGCGCGGAAGGGCCAGTCTCTCCGCCCCCGCCCCAGCGCTC  
TGCCTCCGGCGGGCAGCGACTGTGCGCGGCCCGAGGACACCGTGCAAAACCGGGTG  
TCTCTTGAGAAGGTCTTGGCATCACAGCCCAGAACAGCAGTGGCCTCACCTGTGACCCT  
GGCACAGGCCACGTGGCCTACCTAGCAGGCTGTGTGGTAGTGATTTTGAACCCTAAGGAG  
AACAAGCAGCAGCATATCTTGAACACCGCCAGGAAGTCCCTGAGCGCTCTGGCCTTCTCT  
CCTGATGGGAAGTACATAGTGACAGGAGAGAATGGGCACAGGCCAGCGGTGCGCATCTGG  
GACGTGGAGGAGAAAAGTCAGGTGGCGGAGATGCTGGGCCACAAGTATGGCGTGGCCTGT  
GTGGCCTTCTCACCAATATGAAGCACATCGTGTCCATGGGATACCAGCACGACATGGTA  
CTCAACGTCTGGGACTGGAAGAAAGACATCGTGGTGGCCTCCAACAAGGTGTCTGTCAGG  
GTCATCGCCCTGTCTTCTCTGAAGATAGCAGCTATTTTGTCACTGTTGGGAACCGGCAC  
GTGAGGTTCTGGTTCTTGGATGTCTCCACAGAAGCAAAGGTGACAGGTACAGTGCCCTC  
GTAGGGCGCTCGGCATCCTGGGCGAACTTCAACAACATCTTCTGTGGCGTGGCGTGT  
GGCCGGGGCCAGGTGGCAGGCAGCACCTTCTGTGTCTCTACTCGGCCTGCTCTGCCAG  
TTCAACGAGAAGAGGGTGTGGAGAAGTGGATCAATCTGAAGGTCTCCCTGTCTCCTGC  
CTCTGCGTCAGCCAGGAGCTCATCTTCTGCGGCTGCACAGATGGGATAGTCCGCATCTTC  
GAGGCCACAGCCTGCATTACCTCGCCAACCTGCCCAAGCCACACTACCTTGGGGTAGAT  
GTGGCACTGGGCCTGGAGCCTAGCTTCTCTTCCGCAGGAAGGCGGAAGCCGTCTATCCA  
GATACAGTGGCACTGACGTTTGGATCCCGTGCACCAGCGGCTGTCTGCATTTATAAGGAC  
CACAGCATCTATGTCTGGGATGTCAAGGATATCAACAAAGTGGGCAAGTTGTGGTCAAG  
CTCTTCCATAGCTCCTACGTTTGGAAATGTGGAGGAACTGCAGGTGTATCCTGAGTTTGA  
GATCAGAGAGCTTGTGGCCATCAGGATCTTTTCTGACTTGTTCCTCAGACAACACCATC  
CGCTTCTGGAACATGGATAACTGCCGTGACTCTCACTGGCAGAAAAACATCTTCAGCAAT  
ACCCTTCTGAAGGTAGTGTACGTGGAGAACGACATCCAGCACCTGCAGGACATGTACAC

TTCCCAGACCGCGGGCAGCGAGAGCGGGACACCCGTGGACGCGAAAGCCGGGGTGC GCGT C  
ATGCAGGT CAGT CCTGATGGCCAGCACTTGGCTTCAGGCGACCGCAGTGGAAATCTGAGG  
ATCCACGAGCTGCACTTCATGGATGAGCTGGTGAAGGTGGAGGCCATGATGCTGAGGTG  
CTATGCCTGGAGTACTCCAAGCCTGAGACAGACATAGGGTTGACCTTGCTGGCCTCGGCC  
AGTCCGGGACCGCCTGATCCACGTGCTGAACGTGGAGAAGAATAACAACCTGGAGCAGACC  
CTGGATGACCACTCCTCCTCCATCACGGCCATTAAGTTTGCTGGCCACAGAGACATCCAG  
ATGATCAGCTGTGGGGCCGACAAGAGCATCTACTTCCGCAGTGGCCAGCAGGCCCTCAGAT  
GGGCTCCACTTCGTCCGTACCCACCACGTGGCAGAGAAAACACCTTGTATGACATGGAC  
ATTGACATCACCCAGAAGTACGTGGCCGTGGCCTGCCAGGACCGCAACGTGAGGGTCTAC  
AACACCGTGAACGGGAAGCAGAAGAAGTGTACAAGGGCTCCCAGGGTGATGAAGGATCC  
CTGCTGAAGGTCCATGTGGACCCCTCAGGCACCTTCTGGCCACAAGCTGCTCTGACAAA  
AGCATCTCGGTGATCGACTTTTACTCGGGCGAGTGTGTTGCCAAGATGTTGCGTCACTCA  
GAAATCGTCACTGGCATGAAGTTACCTATGATTGTCGTCACTTGATCACAGTGTCCGGA  
GACAGCTGTGTGTTTCTGTCACCTGGGCCCGAGATCACCAACTGCATGAAGCAGCAC  
TTGTTGGAGATGGACCACCAGGAGCAACAGCAGCACACCAAGGACCAGAACTGGAGCAGC  
GACCCAGGCAGGAGACGTGCACGACCACACCCCGTGGCCCTCGCTCGCTGAGTCTGGGA  
GAGCAGACAGAGGAAGAGCTGGAGGAGGAGTGCAGCCAGAAGAGCTGCTGACGACACCG  
TCCAAGGAGCGCTTGGATCCAGATCCTCGCTGCCTGCTGACTAATGGCAAGCTGCCACTT  
TGGGCAAAGCGGCTGCTAGGAGATGACGATGTGGCGGACGGCTCGGCCTTCCACCCCAAG  
CGCAGCTACCAGCCCCACGGCCGCTGGGCGGAACGGGCTGGCCAGGAGCCCTCAAGACG  
ATCCTGGATGCGCGGGAGCTGGATTGCTACTTTACCCCATGAAGGCCGAGAGCCTGGAC  
GACTCCATTCTGGACACGGTGGAGCCACAGAACCTGGCAGGTCTGCTGAACGAGTCAGAG  
AGCCCCCGCAGGACGGCTGCGGGCAGCGCCCTTCTGCGCCACAGAGGGAGCCAGCG  
GAGGCCAGCGAGCTTTCATCTACTCCCTGGAGGCAGAGGTGCCAGTCCCAGGGGACAGAC  
AGCGAGTCTTTCGAGAAGGAGGCCGAGGCAGGGCCTGGAGACCAGCTCGCTGACTCCTAC  
CTCAGGGTCTCCTCCATCAGCTCGAAGGATCAGAGCCCACCCGAGGACTCTGGGGAGTCA  
GACAGCGATGTGGAGTGCAGCCAGGCCTCCCTCCTCGGCCGAGCCAGGGCCTCGCTGT  
GCCGGAACGACCCCACTCAGGAGCTGCCAGGCCCTCGGAGGAGGAGCTGCCCCGG  
CCCCGAGGGCCAGCGTGCACGAGCTCCCTGCCCCAGACCCCTGAGCAGGAGAAGTTT  
CTCCGCCACCACTTCGAGACCTCACTGACGCCCACCTGAAGGCTCCCTGGGGGACGCG  
AACGTCCCTGAGGCCGAGGACGTCTTCTCAACCCCCGCTGAGCATCTCGGCCAGTTT  
CTCTCACGCCTCCAGAAGCCATCCAGGCTCACCCAGGCCTTCCCTGCCCGGCTGCCCCGC  
CACCTGGCCAAGTCTCCCAGGTGAAGCCCACGGACAGCAGGGGGAGCCAGCCCAGAGCC  
GAGCCCCTGCGAGCAGGTGCTGGCCACGCCTCCCCGAGGGGAGCACGGTCCGCTGTGGG  
GAGAAGGCTGCGGAGACCTCGGAGGCCTGGTGCCACGGACCTCCTGCCTCACCTGCCCG  
GCTCCCTGTGTCCCTTCTCCCCAGTGCCTCCACAGACAGGAAGCCGCCGACACCCACA  
TCCGTACCTCCCCCGGCCTGGCTCCGGGTGTCCACACCCCTCCACCTGTTCTTACATG  
GAGGCCACTGCCAGCTTCCGTGCCAAGATGTCACGCAGCATCTCCCTGGAGGACGGTGAA  
GGCTCTGTTGTGGCTGAGCTGGCCAGGGCCCTCAGAAGGCCCTCATCTGTGGGGGAGCTG  
GCCTCCCTGGGCCAGGAGCTCCACCCATCACCGCCACAGCGACACCCAGTTCTGGCAGC  
GAGAGCCAAGGGCCACCTCCCTCCCGGGGCAACCACGAGGCCCGGGCCAACCTGAGA  
CTGACCCTGCCAAGTGTCTGTGACAGGCTCCTGTTGTCCCCACCCCTCTGGAGTACCC  
ACATGTGTCTGGTCCCAGGAGCCCACGGAAGCCCAGCCCTGTGTCTATGGCCCCAGCACCT  
GGCCCCATGGATAATAATGTCCCAAGACCCCACTCTGCCTTTCTCACAAAGGCTCCCA  
GCTCCTGAGCCCCTCAACTCTCCTGCCACCCCAACAGCCCCAGTTTCCAGAGGCCAGG  
CCTGGAGTCCCTAGTTGCACTGCTTCTTCTGGAGCCCACCCCTGGTGCCTCAGCCTG  
ATCCGGGGCAGCCCTGGCCACTGGGGGAGCTGGGGCTGCCGGCTGAAGTCCCAGCCCCA  
GTGCCCTTGGCTGACCAGCGTGGGGAGTGTGTCGCGCAGGCTGCAGACTGCCTTCCAA  
GAAGCCCTGGGCCTTTACCACACGTTGGTCTCCAGCAACCAGATGGGGCCGAGCGGCG  
CAGGCACAGACCGAGCTGGCGTCCACCTTCTTTGGATCCACAGCCAGCTGGAGGCCACC  
GACTGGCTAGTTGGGACCAACATGGCCCCCGCCAGGCCCTGCCAGCCCAGCGCCCCC  
TCCCCACCTCCGCTGTGCCCGCTGGCCAGCCAGACTTGCACGCCCTGCTAGAACACTAC  
TCGGAACCTGCTGGTACAGGCCGTGCGGAGGAAGGCGCGGGGGACTGA

>Canis familiaris\_WDR62 (ENSCAFT\_10711)  
ATGGCGGCCTTGGGGCCCGGAGGCTACGCGCGCAACGATGCAGTGGAGAAGCTGCCGTCC  
GGCGCGCGGGGGTTCCGGCGCGGAGGGCCAGTGTCTCCGCCCCCGCCCCGCGCTC

TGTCTCCGGCGGGCGGACACGACTCTCGACGGCGCCGGAGGACACGGTGCAGAACCGGGTG  
TCACTCGAGAAGGTACTTTGGCATCACAGCCCAGAACAGCAGTGGCCTAACCTGTGACCCC  
AACACAGGCCATGTGGCCTACCTAGCAGGCTGTGTGGTGGTGATTTTGAACCCCAAGGAG  
AACAAGCAGCAGCACATTTTTAACTGCCAGGAAGTCTCTGAGTGTCTGGCCTTCTCC  
CCTGATGGGAAGTACATAGTGACAGGGGAGAACGGGCACAGGCCTGCTGTGCGCATCTGG  
GACGTGGATGAGAAGAGTCAGGTGGCAGAGATGCTGGGCCACAAGTACGGCGTGGCCTGT  
GTGGCCTTCTCCCCAATATGAAGCACATTGTGTCCATGGGCTACCAGCACGACATGGTA  
CTCAACGTCTGGGACTGGAAGAAAGACATCGTGGTGGCTTCCAACAAAGTATCATGCAGG  
GTCATTGCTCTCTCCTTCTCAGAGGACAGCAGCTATTTTGTACCCGTAGGGAACCGACAC  
GTGAGGTTCTGGTTCTTGAAGTCTCCACAGAAGCAAAGGTGACGGGCACAGTTCCCCTC  
ATAGGGCGTTTCGGGCATCTGGGTGAGCTGCACAACAACATCTTCTGTGGCGTGGCTTGT  
GGCCGGGGCAAGATGGCAGGCAACACCTTCTGTGTCTCTACTCGGCCTCCTTTGCCAG  
TTCAATGAGAAGAGAGTGTGGAGAAGTGGATCGACTTGAAGGTCTCCTTATCTTCATGC  
CTCTGTGTGACCCAGGAGCTCATCTTCTGCGGCTGCACAGATGGGATCGTCCGCATGTTT  
CAGGCCACAGCCTGCAATACCTTGCAAACCTGCCAAAACCACTACCTTGGGGTGGAC  
GTGGCCAGGCTCTGGAGCCAGCTTCTCTTCTGCAGGAAGGCAGAAGCAGTCTACCCA  
GATACAGTGGCGCTGACCTTCGACCCCATCCATCAGTGGCTGTCTGCGTGTATAAGGAC  
CACAGCATCTACATCTGGGACGTCAAAGACATCAACAAAGTAGGCAAGATGTGGTCCGAG  
CTCTTCCACAGCTCCTACGTCTGGAACGTGGAGGTGTATCCTGAGTTTGAAGATCAGAGA  
GCTTGTCTGCCATCAGGATCTTTTTCTTACTTGTTCCTCAGACAACACCATCCGCTTTTGG  
AACATGGATAGCAGTCCCAGCTCTGAATGGCAGAAGAATATCTTCAGTAACACCCTGCTG  
AAGGTAGTGTATGTAGAGAATGACATCCAGCACCTGCAGGACATGTCCCACTTCCAGAC  
CGAGGGAGTGAGAATGGAACACCTGTGGATGTGAAGGCTGGGGTCCGAGTCATGCAGGTC  
AGTCCTGATGGCCAGCACTTGGCTTCCAGGCGACCGAAGTGGAAATCTGAGGATCCACGAG  
CTACACTTCATGGATGAGCTGGTCAAAGTGGAAAGCCATGATGCTGAGGTGCTGTGCCTG  
GAGTACTCCAAGCCTGAGACAGGGCTGACCTTGTGGCCTCAGCCAGTCGGGACCGACTG  
ATCCATGTGTGAATGTGGAGAAGAATAACAACCTGGAGCAGACCCTGGATGACCACTCT  
TCCTCCATCACGGCCATCAAATTTGTGGCAATAGAGACATCCAGATGATCAGCTGTGGG  
GCTGACAAGAGCATCTACTTTTCGAGTGCACAGCCAGCGGACCTCAGATGGACTACACTTTGTC  
CGTACCCACCATGTGGCAGAGAAGACCACCTTGTATGACATGGACATTGACATCACCCAG  
AAGTATGTGGCTGTAGCCTGCCAGGACCGCAATGTGAGAGTCTACAACACCGTGAATGGA  
AAGCAGAAGAAGTGCTACAAAGGCTCCCAGGGTGACGAAGGGTCCCTGCTGAAGGTCCAT  
GTGGACCCCTCAGGCACCTTCTGGCCACTAGCTGCTCCGACAAAAGCATCTCGGTGATT  
GACTTTTATTTCAGGCGAGTGCATTGCCAAGATGTTTGGTCATTTCAGAAATTGTTACCAGC  
ATGAAGTTCACCTACGACTGTGCTCACTTGATCACAGTATCTGGAGACAGCTGTGTGTTT  
ATCTGGCATCTGGGCCAGAGATCACTAACTGCATGAAGCAGCACTTGTGGAGATTAAC  
CACCGGGAGCAACAGCAGCAGCAGAACAGGAAGGACGAGAGGTGGAGCAGCCAGCCAGG  
CAGGAGACCTATACATCCATGCCAGCGAGATTTGCTCCTTAAGCCCTGGAGAGCAGACG  
GAGGAGGAGCTGGAGGAAGAGTGTGAATCGGAAGAGTTGCTGAAGACCCCGTCCAAAGAC  
AGCTTGGACCCAGATCCTCAGTGTCTCCTGACCAATGGCAAACCTGCCACTGTGGGCAAAG  
CGGCTGCTAGGAGACGACGATGTGACAGATGGCTCAGCCTTCCATGCCAAGCGCAGCTAC  
AAGCCACATGGCCGCTGGGCAGAGCGGGCTGACCAGAAGCCCTCAAGACCATCCTGGAT  
GCCCAGGACCTGGATTGCTACTTACCCCCATGAAGCTTGAGAGCCTGGAGGACTCTGTT  
CTGGATACAGTGGAGCCCCAGAGCCTGGCAGGCCTGCTGAGTGTGAGTCCGAGAGCCCCAG  
GAGAATGGCTGTGGGCACCCCTCCTTCTTGGCCCTACAGCGGGAGTCTCTGAGGACAGT  
GAACTCATCATCTACTCCCTGGAGGCAGAGGTGACAGTACAGGGACAGACAGCGATTAC  
TGCACAAAGGACATGAAGGGGAAGCCCAGAGACCAGCAGGGTACTCCTACCTCAGAGGC  
TCCTCCATTAGCTCAAAGGATCGGAGCCACCCGAAGACTCGGGGGAGTCAGAGGCCGAC  
TTGGAGTGCAGCTTACCACCATCCATTGTCCTTCCCCCTCCCCGGCCAACCCCTCGGTTTAA  
ATGATGATGCCCCGCACACCAGGATGCCAGGTACCACAGAAGAGTTATCCCAGCCCGAG  
GTGCTGGGCATATCCAACGGCTCCCTGCCCCAGACCCCTGAGCAGGAGAAGTTCCCTCCGC  
CACCCTTCGAGACACTTACTGACGCACACCCCGAGGAGCTCTTCCATGGATCCCTGAGA  
GACTTGGAGGCCCTGAGGCTGAAGACTTCTTCAATCCCCGGCTTAGCATTTTCAGCTCAG  
TTCCTCTCACGTCTCCAGAAAACATCCAGGTTTACCCACACCTTCCCTCCCCGACTGCCC  
CTGCACCTGGTGAAGTCCCCAGAGGTCAAATTCACGGACCTTGGGTGCAGCCAGCCAGG  
GCAGAGCCTCTGAGAGTAGGCGCTGGCTACACCTCCCCAGGCAGAACCAGCGTCTCTACT  
GGGAAAAGGCTGAGGAGCCCTTGGACACTGGAGGCCTGGTTCCCACTGACCCCTGC



CTCTCAGGCCTGGCATCCTGTGCCCCCTCCTCAGTGCTGCCTGCTGACAGGAAGCCTCTG  
ACGCCCATAGCCCTGCCACTCCAGGCTTGACTCAGGGTGTCCACAGCCCCTCCTCCCAC  
TCCTACATGGCGGCTGCTGCGAGCTCCCAGCCAAAGATGTCACGCAGCATCTCCCTCGAG  
GACAGTGAGGGCCCCGTGCTGGCTGAGCTGGCCAGGCCCTCCCAGGCCGTCTCCGTT  
GGGGAACCTGGTGTCCCTGGGCCAGGAGCTCCAGGCCATCCCCACCGCGGCAGCACCGGGC  
TCTAACAGCGAGGGCCGAGAACCTGCCTTGCTCTCCTTAGGGGGCAACCACGAGGCCCGG  
GCCAGCCTGAAGCTGACCCTGTCAAGCATCTGCGACAGGCTCTTGTTGCCCCCTCCCCCG  
TTGGATCCTGTGGCCACCCAGCCCAGCGTCACAACAGCCACCTTCCCAGTCCCAGCCCC  
GTGGATGCAAGCTCCCTGGGGCTCCACAGTTCCACCTTTCTCCCAGGCTCCTGGTCCCT  
GAGTCCCCCAACACCCCTGCCACCCCAACAGCACCTCACTTCCAGAGACCAGGCCCGGG  
GTCCCTGGCAGCGTCACTCCCTCCTGGAGCCCCCCCCCTGATGCGCTCAGTCTGGTCCAG  
GGCGGCCCTGGACACTGGGAGGACCTGGGGGGCCATTGAGGTTCTGCCCCAACTCCC  
CTTGAACCTAAGCAGTGTGAGCACCATCGTGACAGACTGCAGACTGCCTTCCAAGAAGCC  
ATGGACCTTTACAACCTGGTGGTCTCCAACGACCAGATGAGCACTGATCAGCAGCGGCAG  
GCACGGACTGAGCTGGCCTCCACCTTCTTTGGATCCATAGCCAGTTAGAGGCCAACAGC  
TGGCTGCTGAGGAGTGATGTGGCCCCACCCAGGCCAGCCTGGCCTGGGCTCCCCCTCC  
CCACCGACACTGTGCCCCCTGGCCAGCCAGACTTGCACGCCCTGCTGGAACATTACTCA  
GAGCTGCTGGTGCAGGCTGTGCGGAGGAAGGCCCGGGGGCACTGA

>Felis catus\_WDR62 (ENSFCAT\_14143)

ATGGCGGCCTTGGGGCCCCGAGGCTACGCGCGGAACGATGCAGTCGAGAAGCTGCCATCC  
GTCACGGTGGGAGTTCCGACGCGGAGGAACCAGTGCTCTCCGCTCCCCTCCCCAACTG  
TGTCTCCGGCGGGCGGACCCGACTCTCGGCGGGCCGGAGGACACGGTGCACAACCGGGTG  
TCGCTCGAGAAGGTGCTCGGCATCACAGCCAGAACAGCAGTGGCCTGACCTGTGACCCC  
AGCACAGGCCATGTGGCCTACCTGGCAGGCTGTGTGGTGGTGATTTTGAACCCCAAGGAG  
AACAAGCAGCAGCACATTTTTAACTGCCAGGAAGTCGCTGAGTGCTCTGGCCTTCTCC  
CCTGATGGGAAGTACATAGTGACGGGGGAGAACGGGCACAGGCCTGCTGTGCGCATCTGG  
GATGTGGATGAGAAGAATCAGGTGGCAGAGATGCTGGGCCACAAGTACGGCGTGGCTTGT  
GTGGCTTCTCCCCAATATGAAGCACATCGTGTCTATGGGCTACCAGCACGACATGGTA  
CTCAACGTCTGGGACTGGAAGAAAGACATTGTGGTGGCTTCCAACAAGGTATCATGCAGG  
GTCATCGCCCTCTCTTTCTCAGAGGACAGCAGCTATTTTGTACCCTAGGGAATCGGCAT  
GTGAGGTTCTGGTTCTTGAAGTCTCCTACTGAAGCAAAGGTGACGGGCACGGTGGCCCTC  
GTAGGGCGTTCAGGCATCCTGGGAGAGCTGCACAACAACATCTTCTGTGGCGTGGCTTGT  
GGCCGGGGCCAGATGGCAGGCAATACCTTCTGTGTGCTACTCGGGCCTCCTCTGCCAG  
TTCAATGAGAAGAGGGTGCTGGAGAAGTGGATCAACCTGAAGGTCTCTGTCTTCTCTGC  
CTGTGTGTGTCAGCCAGGAGCTCATCTTTTGGCGTGCACAGATGGGATAGTCCGCATCTTC  
CAGGCCCGCAGCCTGCAGTACCTCGCGAACCTGCCCAAACCGCACTACCTTGGGGTGGAC  
GTGGCCAGGGCTTGGAGCCAGCTTCTCTTCCACAGAAAGGCAGAAGCAGTCTACCCG  
GATACGGTGGCACTGACCTTCGACCCCATCCATCAGTGGCTGTCTGCGTGTATAAGGAC  
CACAGCATCTACATCTGGGATGTCAAAGACATCAACAAAGTAGGCAAGATGTGGTCGGAG  
CTCTTCCACAGCTCCTACGTCTGGAACGTGGAGGTGTATCCGGAGTTTGAAGATCAGAGA  
GCTTGTCTGCCATCAGGATCTTTTCTTACTTGGCTCCTCAGACAACACCATCCGCTTTTGG  
AACAAGGACGGGAGAAAAGAAAGCAGAGTCCCTCTCCCTCCGACACCCTGCTGAAGGTA  
GTGTACGTAGAGAATGACATCCAGCACCTGCAGGACACGTGCACTTCCCAGACCGGGGG  
GGTGAGAACGGGACGCCTGTGGACGTGAAAGCTGGGGTGCGGGTGATGCAGGTGAGTCTC  
GATGGCCAGCACTTGGCTTCCAGGCGACCGAAGTGGAAATCTGAGGATCCACGAGCTACAT  
TTCATGGACGAGCTGGTCAAGGTGGAGGCCCATGATGCTGAGGTGCTGTGCCTGGAGTAC  
TCCAAGCCTGAGACAGGACTGACCTTGTGTCCTCAGCCAGTCCGGACCGACTGATCCAC  
GTGCTGAATGTGGAGAAGAACTACAACCTGGAGCAGACCCTGGATGACCACTCCTCCTCC  
ATCACGGCCATCAAGTTTGTGGCAATAGAGACATCCAGATGATCAGCTGTGGGGCTGAC  
AAGAGCATCTACTTCCGACGTGCCAGCAGGCCCTCAGATGGACTACACTTTGTCCGTACC  
CACCACGTGGCAGAGAAGACCACCTTGTATGACATGGACATCGACATCACCCAAAAGTAT  
GTGGCCGTGGCCTGCCAGGACCGCAATGTGAGAGTCTACAACACCGTGAATGGGAAGCAG  
AAGAAGTGCTACAAGGGCTCCCAGGGTGACGAAGGGTCCCTGCTAAAGGTCCACGTGGAC  
CCCTCAGGCACCTTCTTGGCCACTAGCTGCTCTGACAAAAGCATCTCGGTGATTGACTTT  
TACTCGGGCGAGTGCATTGCCAAGATGTTTGGCCATTGAGAAATCGTAACTGGCATGAAG  
TTCACCTATGACTGTGCTCACTTGGATCACAGTATCTGGAGACAGCTGTGTGTTTCTGCTG

CACCTGGGCCCAGAGATCACTAACTGCATGAAGCAGCACTTGCTGGAGATCGACCACCGG  
GAGCAGCAGCAGCAGAACATGAGGGACGGGAAGTGGAGGAGCCAGCCCAGGCAAGAGACC  
TATGCATCCGTGCCAGCGAGATTTGCTCCTTAAGCCCTGGAGAGCAGACGGAGGATGAG  
CTGGAGGAAGAGTGCGAACCGGAAGAGTTGCTGAAGACGCCATCCAAAGAGAGCTTGGAC  
CCAGACCCTCGGTGTCTGCTGACCAATGGCAAGCTGCCACTCTGGGCAAAGCGGCTGCTA  
GGAGACGATGATGTGGCAGATGGCTCAGCCTTCCATGCCAAGCGCAGCTACAAACCACAT  
GGCCGCTGGGCGGAGCGGGCTGACCAGGAGCCCTCAAGACCATCCTGGATGCCCGGAAC  
CTGGATTGCTACTTTACCCCCATGAAGCCCCGAGAGCCTGGAGGACTCTATTCTGGATACA  
GTGGAGCCCCAGAGCCTGGTGGGACTGCTGAGTGAGTTGGAGAGTCCCCAGGAGGATGGC  
TGTGGGCATCCCTCCTTCCCTGCCCCACAGAGGGAGTCCCCTGAGGACAGGGAGCTCATC  
GTCTACTCCCTGGAGGCAGAAGTGACGGTCACAGAGACAGACAGCAAGTATTGCACGAAG  
ACGACCAGGGCGGGCCCCGGAGAGCAGAAGGAGACGCCTCCCTCAGCGTCTCCTCCATC  
AGCTCCAAGGATCAGAGCCCACCTGAGGAGGAGTCAAGAGGCCGACTTGGAGTGCAGCTTC  
GCCACCATCCATTCTCCCTCCACGGCCAGAGCCAGACCCTCAGTTTGACATGATGCTG  
CCCCCACACCGGGATGCCAGGGACCGAGAAGAGCTGTCCAGCCCCGAGGTGCCAGGC  
ATATCCAACAGCTCCCTGCCCCAGACCCTGAGCAGGAGAAGTTCTCCGCCAGCACTTC  
GAGACGCTCACTGATGCTCACTCTGAGGAGCTCTTCCATGGATCCCTGAGAGACTTGGAG  
GCCTCTGAGACTGAGGACTTCTTCAATCCCCGGTTGAGCATCTCAGCCCAGTTCTCTCA  
CGCTCCAGAAGACATCCAGGTTACCCACACCTTCCCTCCCCGGCTGCCCGGCACCTT  
GTGAAGTCCCCAGAGGTCAATCTCACAGACGCTGGGGGAGTCAAGCCAGAGCAGAGCCC  
CCGAGAGCAGGCGCTGGCCACACCTCCCCAGGCAGAACCAACGTCCCCCTGGGAAAAG  
CCTGAGGAGCCCCTGAGACCCTAGAGGCCTGGTGGCCACTGACCCCTGCCTCACAGGT  
CCGGCACCCCTGTGCGCCCTCCTCCTCAGTGCTGCCACCAGGACAGGAAGCCTTCGACACCC  
ACAGCCCTGCCCACTCCAGGCCTGGCTCAGGGTGTCCACAGCCCCCTCCATCCACTCCTAC  
ATGGAGGCCACTGCCAGCTCCCGTGCCAAGATGTCACGCAGCATCTCCCTCGAGGACAGT  
GAGGGCCCTGTGCTGGCTGAGCTGGCCAGGCCCCCTCCGAGGCCCTCATCAGTCGGGGAG  
CTGGCATCCCTGGGCCAGGAGCTCCAGGCCAACCCACCACGGCAGCACTCAGTTCTAAC  
AGTGAGGGCCGAGAACACTGTCTGCTCCTTGGGGCAACCATGAGGCCCGGGCGAGTCTG  
AAGCTGACCCCTGTGAGCATCTGTGACAGGCTCTTGTACTCCTTCCCCAGTGAACCT  
GTGGCCACCCAGCCAGTGTACCATCGCAACAGCCACCTTCTCGGCCTCCAGCCCCGTG  
GATGCAAGCACCCCTGGGGCTCCACAAATCCACCTTTCTCCCAAGGCTCCTGGCCCCGAG  
CCCCCTCAATACCCCTGCCACCCCAACAGCACCCCACTTCCAGAGGCCAGGCCTGGGGTC  
CCTGGCAGCATCACCTCCGTCTGGAGACAACCCCTGATGCACTCAGTCTGGCCAGGGC  
AACCTTGGCACTGGGAGGAGCCTAGGGTGCCAGCCAGGGTCCCGCCCTCAGCTCGCCTA  
GACCTGAACACTGTGAGTACCATCGTGCACAGACTGCAGACTGCCTTCCAGGAAGCCCTG  
GACCTTTACAACGTGATGGTCTCCCGTGACGAGGTGAGCAGTGAAGCAGCAGGCACGG  
ACTGAACTGGCCTCCACCTTTGTTGGATCCATAGCCAGTTAGAAGCCAGTACTGGCTG  
GTTGGAAGTGTGGCCAGGCCCAGCCCAGCCCAAGGTCTCCTCCCCACCTACATTG  
TGCCCCCTGGCCAGCCAGATTTGCATGCCCTGCTGGAACACTACTCGGAGCTGCTGGTG  
CAGGCTGTGCGGAGGAAGGCACGGGGGATTGAGGGCCAGGAGCCTGCTCTCCACTACAG  
CCCTGCTGCTTCTGAAGAAATAGACATTTTAAGCAAATAAACTGACAGTTTAGAGGAATG  
GTTCTGGTGCCTGTCTGCATCCACAAAGCCCCCTTGGAGGTGGATGCGGGGAAGGAGGGT  
AGGGAGGAGACCAGCCAGGGAACATGAGCGGATAAACTTTGGAAGGGATGAAATTTGTA  
TGCAGCAGGTGTTGGCCTAGCATTGTAGCCTCACCTGCCCTTCTCTTCTGTCTCACCT  
GGGGGACATCAGCCCCAGTGCCTCCCTGCCTTGTTCAGGACTCCATCAATGGGACCAA  
CATTCCCAAGAAATTTGGGAACCGCAATAATGATCCCAGCACCTGGATCCATATTGCCTA  
CGTAGCCCTCTGAGCTGCTGTGGGTCTGTTGTCTTGGCCAGTGAAGCCAGCTATTCC  
CCAAGGAGCCGCCAGCCCTTCTCTCTGCCCCCTACTGGTACCCAAGAACCCACTGGAGC  
CACTGCCATCACCGTGTGCCAGACCATGTTCCCGGTACACACACTGCCACGCCACTGGT  
TCATGGTCCCTAGGCCAAGCCCAGCTGGATCCTGTGAGGTCCAGGCTTTTGTCCCTAACT  
ACAGCAGGGGAAATGGACCGGCAGGCTCACTCACTGGACACTGGGGCAGCATGGCCAGTC  
CATCTAGCAGCTGGAACAAGTAGCTTCCCCAGCAGGAGGACTACAAGTAGATTGCTCCCA  
TGAGCTCCCAGCTCTGGTACCAGCTTCCCTAGGCAGCAGGCATCTGGCCGTGTGGTGCAT  
CTGCCAAGAAGGCCACTCTTGTGACCACAAAAGTCCCTGCTGTCCCAACTCTCTCTAAAA  
AGGAAGCCAGCAAGGGCAGGGTCTCGCCGAAAGCACAGCCCCGCCATGTGGCTTGCTGT  
GGCCTGAACCACCACTTGCCTGAGTTCTCTCTGCTCTGTTTGGTGGTTCATGGCCACTA  
GAAACAAGCTTAGACCCACTCTTGTCCAGGGTACCACAGAGCTCAGACTCAAACCTAGGC

TTGCCTGGTGGCAGAGCCAGACACTTCAGCATAAAGACATGGCCCTGCGCTGTCTCCATA  
AACAATTACACACATCAGAATCAACTGTGCAGTTCAAAAAAATCCTGCCGGGTACCTGTG  
TCGGTTCTGTGTGTGAGGGGTAGGGTGAAGGAGCAAGACAAGATAAGCAAAGCATCTGCC  
TCATGGCATTAGCCTTCTAGAGAGCAAACCGGAATTAAGATGTCAGTGTGCTGGCTTGG  
CTGATGGGTGAGGGAAGGCCTTTCTGAGGTGACATTTGAGCTGAGGCTTGAGAGAAGGCA  
CGGGTCATGTGGGCATCTTGGGAAAGTATCCAGGCAGACAACAGTGGACGCAAATGCCCC  
ATCGGGGGGATGAAATACATGTGTAAGGAATGCAGTGAAGCCAGGAGAGGAGATGGGAGGA  
AGAACAGGGCTCCAGGGGGCAGGGCCTTGTTCACAACATTTAAGTCCAAGAAATACAAC  
ACAATTTTCCCCCAAATAAGATGCCTGGGCTTGGTATTTGAGACGTCAGGTGTTATTTT  
TCAAAGCTCCCTCTCCCTGCCCCAGGGAGCCAGGAGGTCCAGGACTCAGGCGGGCTGGA  
CCTCTGACGGGAGGTTCCCTGACCTGCCAGCCCCACAGGTTACAGACCACTGGGGCCCA  
CTGTCTTGCCTCTGCCTAGCTTGGCCACGGTCACCTAAGATCCCTGATGCGAAGCTTGG  
CATCCAGGCCCCCGACACCCAGAGGACCGTCTTGAGTCATGCCCTCATGGAATGTACC  
CCTCCCACCCTGTATCATGATTAAGCCTTCAACTCCCTAGTAGCAAATCACTGGCTTATA  
GGGTTCCAAGCTGTAGGGACATTTGCTACTCTTGACTATGTTCTCTGCTCCATTAACCCCT  
GAGTCTTGAGTTCTGCCCTCCAGCTTAGTGGGCTCTCTCATAGCTGCAACATGGCTGCCG  
TGCCAGCCCTCAGCAGTACACCTACCCAGCCAGGAACAAAGGCATGAAGGAAGGCAGCCA  
CCAGCATAGTGAGAACAGTGTCTAAGCCTCCCTAGACACCTCCCTTTTCCAGAGCGATTGCA  
GGCAAGAGGAATGGAGATTGCTTTTCAATTTTCTTGACCAGCCGTCTCTCCTGTCTGGGC  
ATGTGGCTGCTCAAACAAAATTGGGTTCTCTCAGCACAGTAGGAGGGTGCCTGGTAGGG  
AGGACCCAGGGTGCCTGCCACTCTCCACTTCCAATGCCAAGCTCTTCCAGCCCTAGAAGG  
ACCAGACTTGCTCTCC

>Ailuropoda melanoleuca\_WDR62 (ENSAMET\_1051)

ATGGCGGCCTTGGGTCCCGGAGGCTACGCGCGGAACGATGCTGTGCGAGAAGCTGCCATCC  
GTCACGGTGGGAGTTCCGGCGCGGAGGGGCCAGTGTCTCCTCCCCCGCTCCGCCGCTC  
TGTCTTCGGCGCGGACACGACTTTCCGGCGCGTCCGAGGACACGGTGCAGAACCGGGT  
TCACTCGAGAAGTACTTGGCATCACAGCCAGAACAGCAGTGGCCTAACCTGTGACCCC  
AGTACAGGCCAGTGGCCTACCTAGCAGGCTGTGTGGTGGTGAATTTGAATCCCAAGGAG  
AACAAGCAGCAGCATATTTTTAACACTGCCAGGAAGTCTCTGAGTGTCTTGGCCTTCTCT  
CCTGATGGGAAGTACATAGTGACGGGGGAGAACGGGCATAGGCCTGCTGTACGCATCTGG  
GATGTGGATGAGAAGAGTCAAGTGGCAGAGATGCTGGGCCACAAGTATGGCGTGGCCTGT  
GTGGCCTTCTCCCCAGTATGAAGCACATTGTGTCCATGGGCTACCAGCACGACATGGTA  
CTCAACGTCTGGGACTGGAAGAAAGACGTTGTGGTGGCTTCCAACAAGGTATCGTGCAGG  
GTCATTGCCCTCTCCTTCTCTGAGGACAGCAGCTATTTTGTACCCTAGGGAATCGGCAC  
GTGAGGTTCTGGTTCTTGAAGTCTCCACGGAAGCAAAGGTGACGGGCACAGTGCCTCTC  
ATCGGGCGCTCAGGCATCCTGGGTGAGCTGCACAACAACATCTTCTGTGGTGTGGCCTGC  
GGCCGGGGCCGATGGCCGGCAGTACCTTCTGTGTGTCTACTCGGGCCTCCTTTGCCAG  
TTCAACGAGAAGAGGGTGTGGAGAAGTGGATCAACCTGAAGGTCTCCTTATCTTCTCTGC  
CTCTGTGTGAGCCAGGAGCTCATCTTCTGCGGCTGCACAGATGGGATAGTCCGCATCTTC  
CAGGCCCACAGCTTGAATACCTCGCGAACCTGCCCAAACCACTACCTTGGGGTGGAT  
GTGGCCAGGGCCTGGAGCCAGCTTCTTCTTCTGCAGGAAGGCAGAAGCAGTCTACCCA  
GATACAGTGGCACTCACCTTCGACCCCATCCATCAGTGGCTGTCTTGTGTGTATAAGGAC  
CACAGCATCTACATCTGGGATGTCAAAGACATCAACAAAGTAGGCAAGATGTGGTCCGAG  
CTCTTCCACAGCTCCTACGTCTGGAACGTGGAGGTGTATCCTGAGTTTGAAGATCAGAGA  
GCTTGCCTGCCATCAGGATCTTTTCTTACTTGTTCCTCAGACAACACCATCCGCATTTGG  
AACATGGATAGCAGCCCTGACTCTCACTGGCAGAAAAATATCTTCCAGTAACACCCCTGCTG  
AAGGTCTGTATGTAGAGAATGACATCCAGCACCTGCAGAACATGTCCCACTTCCAGAC  
CGGGGGAGTGAATAAGGACCCCTATGGACGTGAAGGCTGGGGTGCAGTGCAGGTC  
AGTCTGATGGCCAGCACTTGGCTTCCGGAGACCGAAGTGGAAATCTGAGGATCCACGAG  
CTGCACTTTCATGGATGAGCTGGTCAAGGTGGAGGCCCATGATGCCGAGGTGCTGTGCCTG  
GAGTACTCCAAGCCTGAGACAGGGCTGACCTTGTGGCCTCGGCCAGTAGGGACCGACTG  
ATCCACGTGCTGAACGTTGAGAAGAACTACAACCTGGAGCAGACCCTGGACGACCACTCC  
TCCTCCATCACGGCCATCAAGTTTCTGCTGGCAACAGAGACATCCAGATGATCAGCTGTGGG  
GCTGACAAGAGCATCTACTTTTCGAGTGGCCAGCGGACCTTGGATGGACTACGCTTTGTC  
CGTACCCACCAGTGGCAGAGAAGACCACCTTGTACGACATGGACATTGATATCACCCAA  
AAGTATGTGGCCGTGGCCTGCCAGGACCGCAATGTGAGAGTCTACAACACCGTGAAGTGG

AAGCAGAGGAAGTGCTACAAGGGCTCCCAGGGGACGAAGGGTCCCTGCTGAAGGTCCAC  
GTGGACCCCTCAGGCACCTTCCTGGCCACTAGCTGCTCCGACAAAAGCATCTCAGTGATT  
GACTTTTACTCGGGCGAGTGC GTTGCCAAGATGTTTGGTCACTCAGAAATCGTTACCGGC  
ATGAAGTTCACCTACGACTGTGCTCACTTGATCACGGTATCCGGAGACAGCTGCGTGTTT  
ATCTGGCACCTGGGCCCCGAAATCACTAACTGCATGAAGCAGCACTTGCTGGAGATCAAC  
CACCAGGAGCAGCAGCAGCAGCAGAACGTGAAGGATGGGATGTGGAGCAACCAGCCCAGG  
CAGGAGAGCTATACATCTGTGCCAGCGAGATATGCTCCTTAAGCCCTGGAGAGCAGACA  
GAGGATGAGCTGGAGGAAGAGTGTGAACCGGAAGAGTTGCTGAAGACACCATCCAAAGAG  
AGCTTGGACCCAGATCCTCGATGTCTGCTGACCAATGGCAAACCTGCCACTCTGGGCAAAG  
CGGTGCTAGGAGACGAAGATGTGGCAGATGGCTCAGCCTTCCACGCTAAGCGCAGCTAC  
AAGCCACATGGCCGCTGGGCAGAGCGGGCTGACCAGGAGCCCCCTCAAGACCATCCTGGAT  
GCCCCGGACCTGGATTGCTACTTACCCCCATGAAGCCCCGAGAGCCTGGAGGACTCTATT  
CTGGATACAGTGGAGCCCCAGAGCCTGGCGGCCCTGCTGAGTGAGCCGGAGAGTCCCCAG  
GAGGTTGGCTGTGGGCATCCCTCCTTCCCTGCCCTGCAGAGGGAGTCCTCTGAGGACACC  
GAGCTCATCATCTACTCCCTGGAGGCAGAGTTGATGGTACAGGGACAGACAGTGAGTAC  
TGCACGAAGGACGTCAAGGGGGAGCTCAGAGACCAGCAAGGTGACTCCTACCTCAGAGTC  
TCTTCCATCGGCCCAAAGGATCAGAGCCCACCTGAGGACTCGGGGGAGTCAGAGGCCGAC  
TTGGAGTGCAGCTTACCACCACCCACTCTCCCCCTCCACGGCCAGCCCCGGACCCCTCGG  
TTTGACATGATGATGCCCCACATGCCAGGATGCCAGGTACCACAGAAGAGTTACCCCAG  
CCCGAGGTGCCAGGCATATCCGACGGCTCCCTGCCCCAGACCCCTGAGCAGGAGAAGTTC  
CTCCGCCACCACTTCGAGACGCTTACTGACGCTCACCCCGAGGAGCTCTTCCATGGAGCC  
CTGAGAGACTTGGAGGCGTCTGAGTCTGAGGACTTCTTTAATCCCCGGCTGAGCATTTC  
GCCCAGTTCCTCTCACGCCTCCAGAAGACATCCAGGTTACCCACAGCTTCCCTCCTCGG  
CTGCCCCCTACACCTGGTGAAGTCTCCAGAGGTCAAATTCACAGAGCTTGGGGGCAGCCAG  
TCCAGAGCAGAGCCTCTGAGTTC AAGCGCTGGCTACACCTCCGTCTCGCTGGGAGAAAG  
GCTGAGGAGGCCCAGGAGAGCCTGGAGGCCTGGCGCCCACTGACCCCTGCCTCCCAGGC  
CTGGCGCCCCGTGCCCCCTCCTCCTCAGTGCTGCCATTGACGGGAAGCCTCCGACACCC  
ACAGCCCTACCACTCCAGGCCTGGCTCAGGGTGTCCACGGCCCCCTCCACACACCCCTAC  
ATGGAGGCCACTGCCAGCTCCCGTGCCAAGATGCCACGCAGCATCTCCCTCGAGGACAGT  
GAAGGCCCTGTGCTGGCTGAGCTGACCAGGCCCTCCACAGGCCCTCCTCCGTGGGGGAG  
CTGGCATCCCTGGGCCAGGAGCTCCAGGCCATCCCCACCACTGCAGCACCCAGTTCTAAC  
AGCGAGGGCCAAGAACCTGCCTTGTCTCCTGCGGGCAACCATGAGGCCCGGGCCAGCCTG  
AAGCTGACCCTGTGAGCATCTGTGACAGGCTCTTGCTACCCCTCCCCACTGGAACCT  
TCGGCCACCCAACCCAGTGTCACTGTCAACAACAGCCACCTTCCCAGTCCCCAGTCCCATG  
GATGCAAGCTCCCCGAGGCTCCACAATTCCACCTTTCTCCCAAGGCTCCTGGTCCCTGAG  
CCCCTCAACACCCCTGCCCACCCCATCAGCACCCCACTTCCAGAGGCCAGGGCTGGGGTC  
CCTGGCAGCATCACCTCCCTCCTGGAGCCCACCCCTGATGCACTCAGTCTGGTCCAGGGC  
AGCCCTGGACACTGGGAGGAGCCTGGGGTGCCAGCCAGGGTCCTGCCCCCAGCTCCTCTT  
GAACTGAGCAGTGTGAGCACCATCGTGCACAGACTGCAGACTGCCTTCCAAGAAGCCCTG  
GACCTTTACCACCTGGTGGTCTCCAGTGACCAGGTGAGCACTGAGCAGCAGCGGCAGGCA  
CGGACTGAGCTGGCCTCCACCTTTCTTTGGATCCATAACCAGCTAGAGGCCAACGACTGG  
CTGGTTGGGACTGACGTGGCCCCGGCCCAGGCCAGCACAGCCTGGGTTCCCCCTCCCCA  
ACTACACTGTGCCCCCTGGCCAGCCCCGATTTGCATGCCCTGCTGGAACACTACTCGGAG  
CTGCTGGTGCAGGCCGTACGGAGGAAGGCACGGGGG
